# Supplementary material for: Catalyst-free reaction of 2-(4H-benzo[d][1,3]oxazin-4-yl)acrylates: synthesis of 1,2-dihydroquinolines and 2,3-dihydropyrroles
Source: Royal Society of Chemistry journal article supplement (doi:10.1039/d4cc02156h), 2024-01-01

## Supporting Information

# Catalyst-free reaction of 2-(4H-benzo[d][1,3]oxazin-4-yl)acrylates: synthesis of 1,2-dihydroquinolines and 2,3-dihydropyrroles

Tao Wang,<sup>‡</sup> Zhongyue Lu,<sup>‡</sup> and Pengfei Li\*

Department of Chemistry, Guangdong Provincial Key Laboratory of Catalysis, College of Science, Southern University of Science and Technology Guangming Advanced Research Institute, Southern University of Science and Technology, Shenzhen 518055, China

E-mail: lipf@sustech.edu.cn; flyli1980@gmail.com

## Table of contents

|                                                                            |    |
|----------------------------------------------------------------------------|----|
| <b>General information</b> .....                                           | 2  |
| <b>General procedure for the reaction between 1 and 2</b> .....            | 2  |
| <b>Optimization of reaction conditions</b> .....                           | 3  |
| <b>General procedure for the reaction between 1 and 4</b> .....            | 4  |
| <b>General procedure for the synthesis of compound 6l</b> .....            | 5  |
| <b>General procedure for the gram-scale synthesis of 3aa and 5aa</b> ..... | 5  |
| <b>Characterization Data of the Compounds 3</b> .....                      | 5  |
| <b>Characterization Data of the Compounds 5</b> .....                      | 13 |
| <b>X-ray crystallographic data for 3aa, 5aa and 6l</b> .....               | 21 |
| <b>Reference</b> .....                                                     | 27 |
| <b>NMR spectra of compounds 3</b> .....                                    | 28 |
| <b>NMR spectra of compounds 5</b> .....                                    | 57 |

---

## General information

The 2-(2-aryl-4*H*-benzo[*d*][1,3]oxazin-4-yl)acrylates **1** were synthesized following the general procedure reported by our group earlier.<sup>[1,2]</sup> The sulfur ylides **2** were synthesized following the general procedure reported earlier.<sup>[3,4]</sup> The  $\alpha,\beta$ -unsaturated *N*-aryaldimine **4** were synthesized following the general procedure.<sup>[5,6]</sup>

Starting material and solvents were used without further purification as commercially available unless otherwise noted. Thin-layer chromatography (TLC) was performed on silica gel plates (60GF254) using UV-light (254 and 365nm). Flash chromatography was conducted on silica gel (300–400 mesh). NMR spectra were recorded on a Bruker-400 MHz, 500 MHz and 600 MHz spectrometer. Chemical shifts ( $\delta$ ) are reported in ppm and coupling constants (*J*) are given in Hertz (Hz). Data for <sup>1</sup>H NMR are recorded as follows: chemical shift (ppm), multiplicity (s = singlet, d = doublet, t = triplet, dd = doublet of doublet, m = multiplet, coupling constant (Hz), integration. Data for <sup>13</sup>C NMR are reported in terms of chemical shift ( $\delta$ , ppm). High resolution mass spectral (HRMS) analyses were measured on a Thermo Scientific Orbitrap Fusion mass spectrometer using ESI and quadrupole technology.

## General procedure for the reaction between **1** and **2**

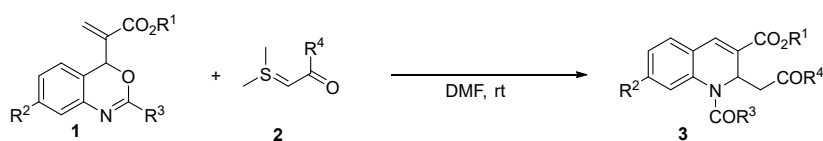

A mixture of **1** (0.1 mmol, 1.0 equiv), **2** (0.2 mmol, 2.0 equiv) in the DMF (0.5 mL) was stirred at room temperature (rt) for 0.5 h. After removing the solvent under atmospheric-vacuum condition, the residue was purified by flash chromatography (petroleum ether/ethyl acetate = 4/1) to afford the desired product **3**.

## Optimization of reaction conditions

**Table S1** Optimization of reaction between **1a** and **2a**.

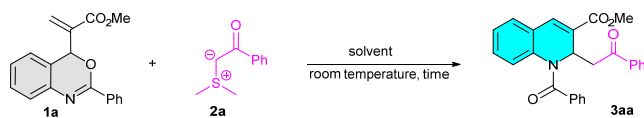

| Entry <sup>a</sup> | <b>2a</b> [equiv.] | Solvent                              | Time [h] | Isolated yield [%] <sup>b</sup> |
|--------------------|--------------------|--------------------------------------|----------|---------------------------------|
| 1                  | 2.0                | CH <sub>2</sub> Cl <sub>2</sub>      | 24       | 54                              |
| 2                  | 2.0                | ClCH <sub>2</sub> CH <sub>2</sub> Cl | 24       | 39                              |
| 3                  | 2.0                | CHCl <sub>3</sub>                    | 24       | 37                              |
| 4                  | 2.0                | toluene                              | 24       | 0                               |
| 5                  | 2.0                | EtOAc                                | 24       | 0                               |
| 6                  | 2.0                | acetone                              | 24       | 0                               |
| 7                  | 2.0                | THF                                  | 24       | 0                               |
| 8                  | 2.0                | MeCN                                 | 24       | 66                              |
| 9                  | 2.0                | DMF                                  | 24       | 98                              |
| 10                 | 2.0                | DMF                                  | 12       | 98                              |
| 11                 | 2.0                | DMF                                  | 6        | 95                              |
| 12                 | 2.0                | DMF                                  | 3        | 95                              |
| 13                 | 2.0                | DMF                                  | 1        | 95                              |
| 14                 | 2.0                | DMF                                  | 0.5      | 95                              |
| 15                 | 2.0                | DMF                                  | 0.3      | 78                              |
| 16                 | 1.8                | DMF                                  | 0.5      | 93                              |
| 17                 | 1.5                | DMF                                  | 0.5      | 93                              |
| 18                 | 1.2                | DMF                                  | 0.5      | 51                              |

<sup>a</sup> Unless noted, a mixture of **1a** (0.1 mmol) and **2a** in the solvent (0.5 mL) was stirred at room temperature (rt) for the time given.

**Table S2** Optimization of reaction between **1a** and **4a**.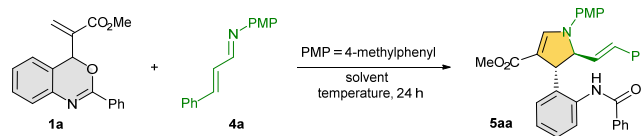

| Entry <sup>a</sup> | <b>4a</b> [equiv.] | Solvent                              | Temp. [°C] | Isolated yield [%] <sup>b</sup> |
|--------------------|--------------------|--------------------------------------|------------|---------------------------------|
| 1                  | 1.5                | DMF                                  | rt         | 31                              |
| 2                  | 1.5                | CH <sub>2</sub> Cl <sub>2</sub>      | rt         | 47                              |
| 3                  | 1.5                | ClCH <sub>2</sub> CH <sub>2</sub> Cl | rt         | 12                              |
| 4                  | 1.5                | CHCl <sub>3</sub>                    | rt         | 45                              |
| 5                  | 1.5                | toluene                              | rt         | 37                              |
| 6                  | 1.5                | THF                                  | rt         | 31                              |
| 7                  | 1.5                | MeCN                                 | rt         | 53                              |
| 8                  | 1.5                | MeCN                                 | 30         | 53                              |
| 9                  | 1.5                | MeCN                                 | 40         | 68                              |
| 10                 | 1.5                | MeCN                                 | 50         | 79                              |
| 11                 | 1.5                | MeCN                                 | 55         | 79                              |
| 12                 | 2.0                | MeCN                                 | 50         | 91                              |
| 13                 | 3.0                | MeCN                                 | 50         | 91                              |

<sup>a</sup> Unless noted, a mixture of **1a** (0.1 mmol) and **4a** in the solvent (1.0 mL) was stirred at the indicated temperature for 24 h. <sup>b</sup> Exclusive product.

### General procedure for the reaction between **1** and **4**

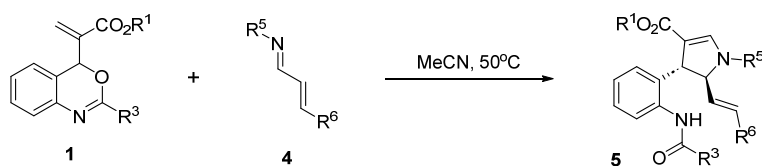

A mixture of  $\alpha,\beta$ -unsaturated *N*-aryldimine **4** (0.20 mmol), **1** (0.10 mmol) in CH<sub>3</sub>CN (1.0 mL) was stirred at 50 °C for 24 hours. After removing the solvent under atmospheric-vacuum condition, the residue was purified by flash chromatography (petroleum ether/ethyl acetate = 5/1) to afford the desired product **5**.

### General procedure for the synthesis of compound 6l

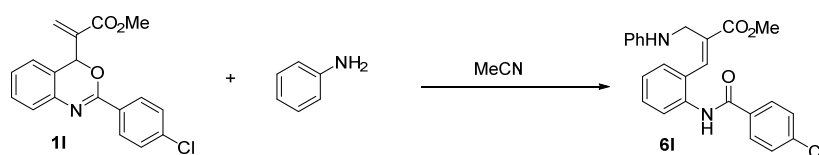

A mixture of aniline (0.20 mmol), MBH adduct **1l** (0.10 mmol) in CH<sub>3</sub>CN (1.0 mL) was stirred at 50 °C for 24 hours. After removing the solvent under atmospheric-vacuum condition, the residue was purified by flash chromatography (petroleum ether/ethyl acetate = 5/1) to afford the desired product **6l**.

### General procedure for the gram-scale synthesis of 3aa and 5aa

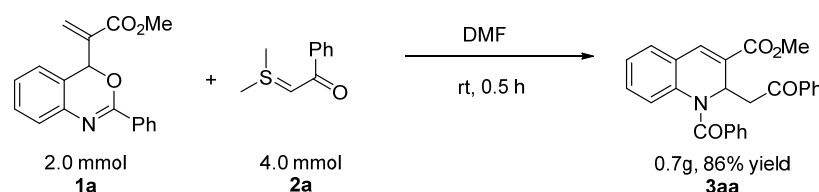

A mixture of **1a** (2 mmol, 1.0 equiv), **2a** (4 mmol, 2.0 equiv) in the DMF (10 mL) was stirred at rt for 0.5 h. After removing the solvent under atmospheric-vacuum condition, the residue was purified by flash chromatography (petroleum ether/ethyl acetate = 4/1) to afford the desired product **3aa** (0.71 g, 86% yield).

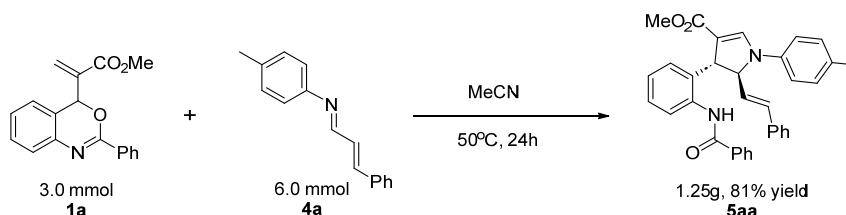

A mixture of **1a** (3.0 mmol) and **4a** (6.0 mmol), in CH<sub>3</sub>CN (30.0 mL) was stirred at 50 °C for 24 hours. After removing the solvent under atmospheric-vacuum condition, the residue was purified by flash chromatography (petroleum ether/ethyl acetate = 5/1) to afford the desired product **5aa** (1.25 g, 81% yield).

### Characterization Data of the Compounds 3

#### Methyl 1-benzoyl-2-(2-oxo-2-phenylethyl)-1,2-dihydroquinoline-3-carboxylate (3aa):

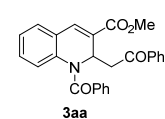

Purified by flash chromatography (petroleum ether/ethyl acetate = 4/1) and obtained as white solid, melting point, 39.0 mg, 95% yield, 104.1-104.6 °C. <sup>1</sup>H NMR (600 MHz, CDCl<sub>3</sub>) δ 8.06 (d, *J* = 7.7 Hz, 2H), 7.68 (s, 1H), 7.56 (t, *J* = 7.3 Hz, 1H), 7.48 (t, *J* = 7.6 Hz, 2H), 7.33 (t, *J* = 8.2 Hz, 2H), 7.25 (s, 2H), 7.21 (t, *J* = 7.5 Hz, 2H), 7.08 (t, *J* = 7.5 Hz, 1H), 6.98 (t, *J* = 7.7 Hz, 1H), 6.60 (d, *J* = 8.1 Hz, 1H), 6.19 (dd, *J* = 8.5, 5.6 Hz, 1H), 3.79 (s, 3H), 3.22 (dd, *J* = 12.7, 5.6 Hz, 1H), 3.00 (dd, *J* = 12.8, 8.5 Hz, 1H) ppm. <sup>13</sup>C NMR (151 MHz, CDCl<sub>3</sub>) δ 197.13, 169.77, 165.22,

137.02, 136.61, 134.99, 134.19, 133.19, 130.78, 130.05, 129.84, 129.12, 128.73, 128.68, 128.67, 128.23, 126.28, 125.67, 125.23, 52.21, 50.34, 40.81 ppm. HRMS (ESI)  $m/z$ :  $[M+H]^+$  Calcd for  $C_{26}H_{22}NO_4$  412.1543; Found 412.1543.

**Ethyl 1-benzoyl-2-(2-oxo-2-phenylethyl)-1,2-dihydroquinoline-3-carboxylate (3ba):**

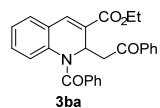

Purified by flash chromatography (petroleum ether/ethyl acetate = 4/1) and obtained as white solid, 40.0 mg, 94% yield, melting point 104.7-104.9 °C.  $^1H$  NMR (500 MHz,  $CDCl_3$ )  $\delta$  8.22 – 7.94 (m, 2H), 7.69 (s, 1H), 7.62 – 7.54 (m, 1H), 7.53 – 7.44 (m, 2H), 7.40 – 7.30 (m, 2H), 7.25 (d,  $J$  = 1.7 Hz, 2H), 7.24 – 7.19 (m, 2H), 7.12 – 7.05 (m, 1H), 7.04 – 6.89 (m, 1H), 6.62 (s, 1H), 6.25 – 6.12 (m, 1H), 4.35 – 4.21 (m, 2H), 3.24 (dd,  $J$  = 12.6, 5.6 Hz, 1H), 2.96 (dd,  $J$  = 12.5, 8.8 Hz, 1H), 1.29 (t,  $J$  = 7.1 Hz, 3H) ppm.  $^{13}C$  NMR (101 MHz,  $CDCl_3$ )  $\delta$  197.16, 169.79, 164.79, 136.99, 136.55, 134.95, 134.04, 133.23, 130.79, 130.31, 129.81, 129.16, 128.75, 128.70, 128.66, 128.22, 126.28, 125.68, 125.23, 61.37, 50.40, 40.86, 14.25 ppm. HRMS (ESI)  $m/z$ :  $[M+H]^+$  Calcd for  $C_{27}H_{24}NO_4$  426.1700; Found 426.1700.

**Butyl 1-benzoyl-2-(2-oxo-2-phenylethyl)-1,2-dihydroquinoline-3-carboxylate (3ca):**

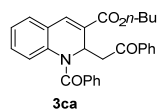

Purified by flash chromatography (petroleum ether/ethyl acetate = 4/1) and obtained as white oil, 39.9 mg, 88% yield.  $^1H$  NMR (500 MHz,  $CDCl_3$ )  $\delta$  8.17 – 8.05 (m, 2H), 7.68 (s, 1H), 7.60 – 7.52 (m, 1H), 7.52 – 7.46 (m, 2H), 7.38 – 7.33 (m, 2H), 7.25 – 7.19 (m, 3H), 7.14 – 7.06 (m, 1H), 7.05 – 6.93 (m, 1H), 6.68 – 6.49 (m, 1H), 6.18 (dd,  $J$  = 8.7, 5.4 Hz, 1H), 4.41 – 4.13 (m, 2H), 3.24 (dd,  $J$  = 12.6, 5.5 Hz, 1H), 2.95 (dd,  $J$  = 12.6, 8.7 Hz, 1H), 1.71 – 1.57 (m, 3H), 1.49 – 1.33 (m, 2H), 0.95 (t,  $J$  = 7.4 Hz, 3H) ppm.  $^{13}C$  NMR (101 MHz,  $CDCl_3$ )  $\delta$  197.15, 169.79, 164.87, 137.00, 136.54, 134.95, 134.00, 133.22, 130.77, 130.34, 129.81, 129.14, 128.75, 128.69, 128.66, 128.22, 126.31, 125.70, 125.23, 65.27, 50.41, 40.82, 30.70, 19.33, 13.90 ppm. HRMS (ESI)  $m/z$ :  $[M+H]^+$  Calcd for  $C_{29}H_{28}NO_4$  454.2013; Found 454.2014.

**Isobutyl 1-benzoyl-2-(2-oxo-2-phenylethyl)-1,2-dihydroquinoline-3-carboxylate (3da):**

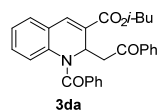

Purified by flash chromatography (petroleum ether/ethyl acetate = 4/1) and obtained as white solid, 39.4 mg, 87% yield, melting point 107.6 - 108.0 °C.  $^1H$  NMR (500 MHz,  $CDCl_3$ )  $\delta$  8.14 – 7.99 (m, 2H), 7.67 (s, 1H), 7.63 – 7.53 (m, 1H), 7.53 – 7.44 (m, 2H), 7.36 – 7.30 (m, 2H), 7.26 – 7.17 (m, 4H), 7.09 (t,  $J$  = 7.5 Hz, 1H), 7.04 – 6.95 (m, 1H), 6.64 (s, 1H), 6.19 (dd,  $J$  = 8.9, 5.2 Hz, 1H), 4.10 – 3.95 (m, 2H), 3.26 (dd,  $J$  = 12.7, 5.2 Hz, 1H), 2.95 (dd,  $J$  = 12.7, 8.9 Hz, 1H), 2.03 – 1.92 (m, 1H), 0.98 (dd,  $J$  = 6.7, 1.8 Hz, 6H) ppm.  $^{13}C$  NMR (101 MHz,  $CDCl_3$ )  $\delta$  197.15, 169.78, 164.84, 137.00, 136.54, 134.94, 133.97, 133.21, 130.74, 130.35, 129.83, 129.10, 128.73, 128.68, 128.64, 128.21, 126.36, 125.71, 125.24, 71.41, 50.42, 40.72, 27.89, 19.35, 19.31 ppm. HRMS (ESI)  $m/z$ :  $[M+H]^+$  Calcd for  $C_{29}H_{28}NO_4$  454.2013; Found 454.2014.

**Tert-butyl 1-benzoyl-2-(2-oxo-2-phenylethyl)-1,2-dihydroquinoline-3-carboxylate (3ea):**

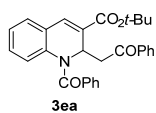

Purified by flash chromatography (petroleum ether/ethyl acetate = 4/1) and obtained as white solid, 36.7 mg, 81% yield, melting point 110.4 - 110.6 °C. <sup>1</sup>H NMR (500 MHz, CDCl<sub>3</sub>) δ 8.18 – 8.04 (m, 2H), 7.65 – 7.55 (m, 2H), 7.53 – 7.42 (m, 2H), 7.39 – 7.30 (m, 2H), 7.27 (d, *J* = 6.9 Hz, 2H), 7.24 – 7.18 (m, 2H), 7.14 – 7.03 (m, 1H), 7.03 – 6.92 (m, 1H), 6.63 (s, 1H), 6.13 (dd, *J* = 8.4, 5.9 Hz, 1H), 3.17 (dd, *J* = 12.4, 6.0 Hz, 1H), 2.99 (dd, *J* = 12.4, 8.5 Hz, 1H), 1.49 (s, 9H) ppm. <sup>13</sup>C NMR (126 MHz, CDCl<sub>3</sub>) δ 197.18, 169.79, 163.87, 137.08, 136.41, 135.03, 133.26, 133.21, 131.88, 130.77, 129.53, 129.19, 128.78, 128.73, 128.56, 128.21, 126.17, 125.87, 125.17, 81.98, 50.44, 41.02, 28.13 ppm. HRMS (ESI) *m/z*: [M+H]<sup>+</sup> Calcd for C<sub>29</sub>H<sub>28</sub>NO<sub>4</sub> 454.2013; Found 454.2015.

**Benzyl 1-benzoyl-2-(2-oxo-2-phenylethyl)-1,2-dihydroquinoline-3-carboxylate (3fa):**

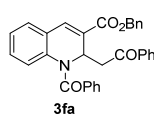

Purified by flash chromatography (petroleum ether/ethyl acetate = 4/1) and obtained as white oil, 42.9 mg, 88% yield. <sup>1</sup>H NMR (500 MHz, CDCl<sub>3</sub>) δ 8.10 – 7.88 (m, 2H), 7.72 (s, 1H), 7.63 – 7.47 (m, 1H), 7.47 – 7.29 (m, 9H), 7.26 – 7.17 (m, 4H), 7.16 – 7.07 (m, 1H), 7.06 – 6.95 (m, 1H), 6.65 (d, *J* = 7.8 Hz, 1H), 6.20 (dd, *J* = 9.0, 5.1 Hz, 1H), 5.38 – 5.22 (m, 2H), 3.28 (dd, *J* = 12.7, 5.2 Hz, 1H), 2.91 (dd, *J* = 12.6, 9.0 Hz, 1H) ppm. <sup>13</sup>C NMR (126 MHz, CDCl<sub>3</sub>) δ 197.14, 169.76, 164.63, 136.88, 136.61, 135.64, 134.90, 134.57, 133.17, 130.75, 129.96, 129.94, 129.10, 128.83, 128.72, 128.69, 128.64, 128.62, 128.58, 128.20, 126.36, 125.58, 125.23, 67.13, 50.39, 40.70 ppm. HRMS (ESI) *m/z*: [M+H]<sup>+</sup> Calcd for C<sub>32</sub>H<sub>26</sub>NO<sub>4</sub> 488.1856; Found 488.1862.

**Methyl 1-benzoyl-7-fluoro-2-(2-oxo-2-phenylethyl)-1,2-dihydroquinoline-3-carboxylate (3ga):**

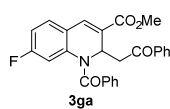

Purified by flash chromatography (petroleum ether/ethyl acetate = 4/1) and obtained as white oil, 35.6 mg, 83% yield. <sup>1</sup>H NMR (400 MHz, CDCl<sub>3</sub>) δ 8.11 – 7.94 (m, 2H), 7.64 (s, 1H), 7.59 – 7.53 (m, 1H), 7.50 – 7.44 (m, 2H), 7.40 – 7.34 (m, 1H), 7.32 – 7.26 (m, 2H), 7.26 – 7.20 (m, 3H), 6.88 – 6.72 (m, 1H), 6.39 (d, *J* = 10.2 Hz, 1H), 6.11 (dd, *J* = 8.6, 5.4 Hz, 1H), 3.79 (s, 3H), 3.23 (dd, *J* = 12.9, 5.4 Hz, 1H), 2.95 (dd, *J* = 12.9, 8.7 Hz, 1H) ppm. <sup>13</sup>C NMR (101 MHz, CDCl<sub>3</sub>) δ 197.00, 169.97, 165.10, 162.93 (*J*<sub>CF</sub> = 251.5 Hz), 138.40 (*J*<sub>CF</sub> = 10.1 Hz), 136.86, 134.40, 133.43, 133.33, 131.20, 130.12 (*J*<sub>CF</sub> = 10.1 Hz), 128.92, 128.86, 128.77, 128.60, 128.48, 122.02 (*J*<sub>CF</sub> = 2.6 Hz), 113.67 (*J*<sub>CF</sub> = 26.3 Hz), 112.65 (*J*<sub>CF</sub> = 22.2 Hz), 52.29, 50.46, 40.77 ppm. <sup>19</sup>F NMR (376 MHz, CDCl<sub>3</sub>) δ -107.29 ppm. HRMS (ESI) *m/z*: [M+H]<sup>+</sup> Calcd for C<sub>26</sub>H<sub>21</sub>FNO<sub>4</sub> 430.1449; Found 430.1452.

**Methyl 1-benzoyl-7-chloro-2-(2-oxo-2-phenylethyl)-1,2-dihydroquinoline-3-carboxylate (3ha):**

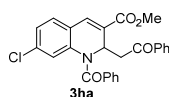

Purified by flash chromatography (petroleum ether/ethyl acetate = 4/1) and obtained as white oil, 35.6 mg, 80% yield. <sup>1</sup>H NMR (400 MHz, CDCl<sub>3</sub>) δ 8.09 – 7.99 (m, 2H), 7.64 (s, 1H), 7.61 – 7.54 (m, 1H), 7.52 – 7.45 (m, 2H), 7.43 – 7.35 (m, 1H), 7.31 – 7.26 (m, 3H), 7.24 (s, 2H), 7.06 (dd, *J* = 8.2, 2.0 Hz, 1H), 6.61 (s, 1H), 6.14 (dd, *J* = 8.5, 5.4 Hz,

1H), 3.81 (s, 3H), 3.25 (dd,  $J = 12.9, 5.4$  Hz, 1H), 2.96 (dd,  $J = 12.9, 8.6$  Hz, 1H) ppm.  $^{13}\text{C}$  NMR (101 MHz,  $\text{CDCl}_3$ )  $\delta$  196.95, 169.90, 165.00, 137.59, 136.86, 135.52, 134.33, 133.36, 133.28, 131.19, 129.97, 129.43, 128.91, 128.78, 128.60, 128.46, 126.26, 125.49, 124.06, 52.36, 50.46, 40.74 ppm. HRMS (ESI)  $m/z$ :  $[\text{M}+\text{H}]^+$  Calcd for  $\text{C}_{26}\text{H}_{21}\text{ClNO}_4$  446.1154; Found 446.1157.

**Methyl 1-benzoyl-7-bromo-2-(2-oxo-2-phenylethyl)-1,2-dihydroquinoline-3-carboxylate (3ia):**

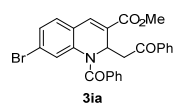

Purified by flash chromatography (petroleum ether/ethyl acetate = 4/1) and obtained as white solid, melting point 132.1 – 132.7 °C 38.6 mg, 79% yield.  $^1\text{H}$  NMR (400 MHz,  $\text{CDCl}_3$ )  $\delta$  8.02 – 8.00 (m, 2H), 7.62 (s, 1H), 7.58 – 7.55 (m, 1H), 7.50 – 7.46 (m, 2H), 7.40 – 7.38 (m, 1H), 7.29 – 7.26 (m, 4H), 7.24 – 7.16 (m, 2H), 6.74 (s, 1H), 6.15–6.11 (m, 1H), 3.81 (s, 3H), 3.27 – 3.23 (m, 1H), 2.99 – 2.94 (m, 1H) ppm.  $^{13}\text{C}$  NMR (101 MHz,  $\text{CDCl}_3$ )  $\delta$  196.95, 169.88, 165.00, 137.59, 136.86, 134.31, 133.37, 133.34, 131.19, 130.13, 129.57, 129.15, 128.90, 128.79, 128.60, 128.46, 128.38, 124.43, 123.55, 52.38, 50.46, 40.72 ppm. HRMS (ESI)  $m/z$ :  $[\text{M}+\text{H}]^+$  Calcd for  $\text{C}_{26}\text{H}_{21}\text{BrNO}_4$  490.0648; Found 490.0651.

**Methyl 1-benzoyl-7-methyl-2-(2-oxo-2-phenylethyl)-1,2-dihydroquinoline-3-carboxylate (3ja):**

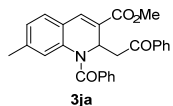

Purified by flash chromatography (petroleum ether/ethyl acetate = 4/1) and obtained as white solid, 36.1 mg, 85% yield, melting point 139.4 – 139.6 °C.  $^1\text{H}$  NMR (500 MHz,  $\text{CDCl}_3$ )  $\delta$  8.14 – 7.97 (m, 2H), 7.66 (s, 1H), 7.61 – 7.53 (m, 1H), 7.52 – 7.44 (m, 2H), 7.37 – 7.30 (m, 1H), 7.26 – 7.18 (m, 5H), 6.95 – 6.84 (m, 1H), 6.39 (s, 1H), 6.16 (dd,  $J = 8.7, 5.3$  Hz, 1H), 3.79 (s, 3H), 3.24 (dd,  $J = 12.7, 5.4$  Hz, 1H), 2.95 (dd,  $J = 12.7, 8.7$  Hz, 1H), 2.02 (s, 3H) ppm.  $^{13}\text{C}$  NMR (126 MHz,  $\text{CDCl}_3$ )  $\delta$  197.25, 169.86, 165.36, 140.54, 137.00, 136.41, 135.09, 134.34, 133.15, 130.64, 128.97, 128.70, 128.66, 128.63, 128.47, 128.12, 127.01, 126.15, 123.09, 52.16, 50.40, 40.76, 21.61 ppm. HRMS (ESI)  $m/z$ :  $[\text{M}+\text{H}]^+$  Calcd for  $\text{C}_{27}\text{H}_{24}\text{NO}_4$  426.1700, Found 426.1703.

**Methyl 1-(4-fluorobenzoyl)-2-(2-oxo-2-phenylethyl)-1,2-dihydroquinoline-3-carboxylate (3ka):**

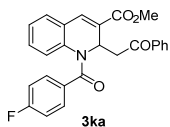

(3ka): Purified by flash chromatography (petroleum ether/ethyl acetate = 4/1) and obtained as white oil, 39.9 mg, 93% yield.  $^1\text{H}$  NMR (400 MHz,  $\text{CDCl}_3$ )  $\delta$  8.07 – 8.04 (m, 2H), 7.68 (s, 1H), 7.59 – 7.55 (m, 1H), 7.51 – 7.46 (m, 2H), 7.35 – 7.33 (m, 1H), 7.19 (s, 4H), 7.14 – 7.10 (m, 1H), 7.05 – 7.01 (m, 1H), 6.62 – 6.60 (m, 1H), 6.17 – 6.14 (m, 1H), 3.81 (s, 3H), 3.26 – 3.21 (m, 1H), 2.97 – 2.92 (m, 1H) ppm.  $^{13}\text{C}$  NMR (101 MHz,  $\text{CDCl}_3$ )  $\delta$  197.09, 168.60, 165.16, 136.97, 136.88, 136.27, 134.15, 133.33, 133.30, 130.62, 130.11, 130.07, 128.81, 128.78, 128.65, 128.56, 126.26, 125.67, 125.54, 52.32, 50.42, 40.59 ppm.  $^{19}\text{F}$  NMR (376 MHz,  $\text{CDCl}_3$ )  $\delta$  -108.24 ppm. HRMS (ESI)  $m/z$ :  $[\text{M}+\text{Na}]^+$  Calcd for  $\text{C}_{26}\text{H}_{21}\text{FNO}_4\text{Na}$  452.1269; Found 452.1270.

**Methyl 1-(4-chlorobenzoyl)-2-(2-oxo-2-phenylethyl)-1,2-dihydroquinoline-3-carboxylate (3la):**

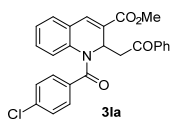

Purified by flash chromatography (petroleum ether/ethyl acetate = 4/1) and obtained as white oil, 41.4 mg, 93% yield.  $^1\text{H}$  NMR (500 MHz,  $\text{CDCl}_3$ )  $\delta$  8.08 – 8.01



(m, 2H), 7.68 (s, 1H), 7.60 – 7.55 (m, 1H), 7.52 – 7.46 (m, 2H), 7.36 – 7.33 (m, 1H), 7.19 (s, 4H), 7.15 – 7.10 (m, 1H), 7.06 – 7.00 (m, 1H), 6.62 (s, 1H), 6.16 (dd,  $J = 8.9, 5.2$  Hz, 1H), 3.81 (s, 3H), 3.24 (dd,  $J = 12.8, 5.3$  Hz, 1H), 2.94 (dd,  $J = 12.8, 8.9$  Hz, 1H).ppm.  $^{13}\text{C}$  NMR (101 MHz,  $\text{CDCl}_3$ )  $\delta$  197.08, 168.59, 165.15, 136.96, 136.87, 136.26, 134.14, 133.32, 133.29, 130.61, 130.11, 130.07, 128.81, 128.77, 128.64, 128.55, 126.26, 125.67, 125.53, 52.31, 50.41, 40.58 ppm. HRMS (ESI)  $m/z$ :  $[\text{M}+\text{H}]^+$  Calcd for  $\text{C}_{26}\text{H}_{21}\text{ClNO}_4$  446.1154; Found 446.1154.

**Methyl 1-(4-bromobenzoyl)-2-(2-oxo-2-phenylethyl)-1,2-dihydroquinoline-3-carboxylate**

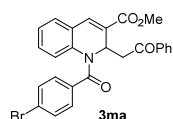

**(3ma):** Purified by flash chromatography (petroleum ether/ethyl acetate = 4/1) and obtained as white solid, 42.5 mg, 87% yield, melting point 144.1 – 144.7 °C.  $^1\text{H}$  NMR (500 MHz,  $\text{CDCl}_3$ )  $\delta$  8.09 – 8.02 (m, 2H), 7.67 (s, 1H), 7.60 – 7.54 (m, 1H), 7.52 – 7.45 (m, 2H), 7.39 – 7.32 (m, 3H), 7.16 – 7.09 (m, 3H), 7.07 – 7.01 (m, 1H), 6.62 (s, 1H), 6.15 (dd,  $J = 8.9, 5.2$  Hz, 1H), 3.81 (s, 3H), 3.23 (dd,  $J = 12.8, 5.2$  Hz, 1H), 2.94 (dd,  $J = 12.8, 9.0$  Hz, 1H) ppm.  $^{13}\text{C}$  NMR (126 MHz,  $\text{CDCl}_3$ )  $\delta$  197.06, 168.65, 165.14, 136.85, 136.20, 134.13, 133.79, 133.29, 131.50, 130.76, 130.09, 128.80, 128.76, 128.68, 128.63, 126.25, 125.66, 125.55, 125.39, 52.31, 50.40, 40.55 ppm. HRMS (ESI)  $m/z$ :  $[\text{M}+\text{H}]^+$  Calcd for  $\text{C}_{26}\text{H}_{21}\text{BrNO}_4$  490.0648; Found 490.0651.

**Methyl 1-(4-methylbenzoyl)-2-(2-oxo-2-phenylethyl)-1,2-dihydroquinoline-3-carboxylate**

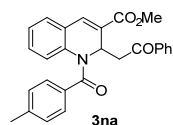

**(3na):** Purified by flash chromatography (petroleum ether/ethyl acetate = 4/1) and obtained as white oil, 35.7 mg, 84% yield.  $^1\text{H}$  NMR (400 MHz,  $\text{CDCl}_3$ )  $\delta$  8.14 – 8.04 (m, 2H), 7.68 (s, 1H), 7.59 – 7.53 (m, 1H), 7.52 – 7.45 (m, 2H), 7.35 – 7.30 (m, 1H), 7.19 – 7.12 (m, 2H), 7.11 – 7.05 (m, 1H), 7.04 – 6.91 (m, 3H), 6.60 (d,  $J = 8.1$  Hz, 1H), 6.17 (dd,  $J = 8.3, 5.9$  Hz, 1H), 3.78 (s, 3H), 3.20 (dd,  $J = 12.5, 5.9$  Hz, 1H), 3.02 (dd,  $J = 12.6, 8.3$  Hz, 1H), 2.30 (s, 3H) ppm.  $^{13}\text{C}$  NMR (101 MHz,  $\text{CDCl}_3$ )  $\delta$  197.25, 169.82, 165.27, 141.29, 137.01, 136.86, 134.25, 133.18, 131.96, 129.93, 129.86, 129.32, 128.91, 128.74, 128.69, 128.67, 126.21, 125.53, 125.05, 52.21, 50.41, 40.96, 21.61 ppm. HRMS (ESI)  $m/z$ :  $[\text{M}+\text{H}]^+$  Calcd for  $\text{C}_{27}\text{H}_{24}\text{NO}_4$  426.1700; Found 426.1700.

**Methyl 1-(4-methoxybenzoyl)-2-(2-oxo-2-phenylethyl)-1,2-dihydroquinoline-3-carboxylate**

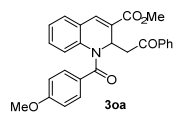

**(3oa):** Purified by flash chromatography (petroleum ether/ethyl acetate = 4/1) and obtained as white solid, 36.5 mg, 82% yield, melting point 126.4 – 126.9 °C.  $^1\text{H}$  NMR (400 MHz,  $\text{CDCl}_3$ )  $\delta$  8.14 – 8.05 (m, 2H), 7.68 (s, 1H), 7.59 – 7.53 (m, 1H), 7.52 – 7.46 (m, 2H), 7.35 – 7.29 (m, 1H), 7.23 (d,  $J = 8.4$  Hz, 2H), 7.11 – 7.05 (m, 1H), 7.03 – 6.96 (m, 1H), 6.74 – 6.68 (m, 2H), 6.59 (d,  $J = 8.1$  Hz, 1H), 6.15 (dd,  $J = 8.1, 6.1$  Hz, 1H), 3.77 (s, 3H), 3.77 (s, 3H), 3.19 (dd,  $J = 12.4, 6.1$  Hz, 1H), 3.03 (dd,  $J = 12.4, 8.2$  Hz, 1H) ppm.  $^{13}\text{C}$  NMR (101 MHz,  $\text{CDCl}_3$ )  $\delta$  197.30, 169.34, 165.28, 161.72, 137.14, 137.04, 134.20, 133.17, 131.44, 129.93, 129.88, 128.74, 128.70, 126.90, 126.13, 125.44, 125.31, 124.93, 113.49, 55.41, 52.19, 50.54, 41.08 ppm. HRMS (ESI)  $m/z$ :  $[\text{M}+\text{H}]^+$  Calcd for  $\text{C}_{27}\text{H}_{24}\text{NO}_5$  442.1649; Found 442.1653.

**Methyl 1-(3-methylbenzoyl)-2-(2-oxo-2-phenylethyl)-1,2-dihydroquinoline-3-carboxylate**

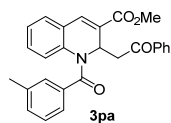

**(3pa):** Purified by flash chromatography (petroleum ether/ethyl acetate = 4/1) and obtained as white solid, 34.4 mg, 81% yield, melting point 87.3 – 88.1 °C. <sup>1</sup>H NMR (400 MHz, CDCl<sub>3</sub>) δ 8.16 – 8.03 (m, 2H), 7.68 (s, 1H), 7.65 – 7.54 (m, 1H), 7.54 – 7.46 (m, 2H), 7.38 – 7.31 (m, 1H), 7.21 – 6.92 (m, 6H), 6.63 (d, *J* = 8.1 Hz, 1H), 6.18 (dd, *J* = 8.5, 5.6 Hz, 1H), 3.79 (s, 3H), 3.21 (dd, *J* = 12.6, 5.6 Hz, 1H), 2.98 (dd, *J* = 12.6, 8.6 Hz, 1H), 2.25 (s, 3H) ppm. <sup>13</sup>C NMR (126 MHz, CDCl<sub>3</sub>) δ 197.22, 169.99, 165.27, 138.26, 136.98, 136.65, 134.85, 134.30, 133.22, 131.56, 129.92, 129.87, 129.84, 128.75, 128.68, 128.66, 127.93, 126.27, 126.05, 125.57, 125.18, 52.24, 50.33, 40.86, 21.34 ppm. HRMS (ESI) *m/z*: [M+H]<sup>+</sup> Calcd for C<sub>27</sub>H<sub>24</sub>NO<sub>4</sub> 426.1700; Found 426.1701.

**Methyl 1-(3-methoxybenzoyl)-2-(2-oxo-2-phenylethyl)-1,2-dihydroquinoline-3-carboxylate**

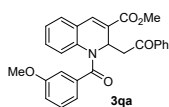

**(3qa):** Purified by flash chromatography (petroleum ether/ethyl acetate = 4/1) and obtained as white oil, 36.2 mg, 82% yield. <sup>1</sup>H NMR (400 MHz, CDCl<sub>3</sub>) δ 8.12 – 8.00 (m, 2H), 7.68 (s, 1H), 7.60 – 7.53 (m, 1H), 7.53 – 7.44 (m, 2H), 7.32 (dd, *J* = 7.6, 1.6 Hz, 1H), 7.14 – 7.04 (m, 2H), 7.04 – 6.96 (m, 1H), 6.91 – 6.81 (m, 2H), 6.74 (d, *J* = 7.5 Hz, 1H), 6.64 (d, *J* = 8.1 Hz, 1H), 6.19 (dd, *J* = 8.6, 5.5 Hz, 1H), 3.79 (s, 3H), 3.68 (s, 3H), 3.21 (dd, *J* = 12.7, 5.5 Hz, 1H), 2.99 (dd, *J* = 12.7, 8.6 Hz, 1H) ppm. <sup>13</sup>C NMR (101 MHz, CDCl<sub>3</sub>) δ 197.16, 169.56, 165.23, 159.42, 136.96, 136.55, 136.15, 134.23, 133.23, 129.98, 129.91, 129.21, 128.75, 128.67, 128.65, 126.18, 125.55, 125.29, 121.42, 117.32, 113.88, 55.41, 52.25, 50.34, 40.76 ppm. HRMS (ESI) *m/z*: [M+H]<sup>+</sup> Calcd for C<sub>27</sub>H<sub>24</sub>NO<sub>5</sub> 442.1649; Found 442.1652.

**Methyl 2-(2-oxo-2-phenylethyl)-1-(thiophene-2-carbonyl)-1,2-dihydroquinoline-3-carboxylate (3ra)**

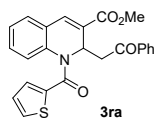

**(3ra):** Purified by flash chromatography (petroleum ether/ethyl acetate = 4/1) and obtained as white oil, 33.4 mg, 80% yield. <sup>1</sup>H NMR (500 MHz, CDCl<sub>3</sub>) δ 8.17 – 7.97 (m, 2H), 7.67 (s, 1H), 7.59 – 7.53 (m, 1H), 7.55 – 7.44 (m, 2H), 7.43 – 7.33 (m, 2H), 7.22 – 7.15 (m, 1H), 7.14 – 7.04 (m, 1H), 6.99 – 6.91 (m, 2H), 6.87 – 6.76 (m, 1H), 6.14 (dd, *J* = 8.2, 6.0 Hz, 1H), 3.76 (s, 3H), 3.19 (dd, *J* = 12.7, 6.0 Hz, 1H), 3.03 (dd, *J* = 12.6, 8.3 Hz, 1H) ppm. <sup>13</sup>C NMR (101 MHz, CDCl<sub>3</sub>) δ 197.12, 165.18, 163.00, 137.29, 136.91, 136.50, 134.06, 133.26, 132.27, 130.88, 130.32, 129.87, 128.79, 128.71, 128.65, 126.90, 126.34, 126.01, 125.74, 52.23, 50.87, 40.83 ppm. HRMS (ESI) *m/z*: [M+H]<sup>+</sup> Calcd for C<sub>24</sub>H<sub>20</sub>NO<sub>4</sub>S 418.1108, Found 418.1107.

**Methyl 1-benzoyl-2-(2-(4-fluorophenyl)-2-oxoethyl)-1,2-dihydroquinoline-3-carboxylate**

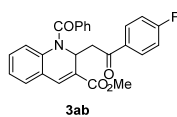

**(3ab):** Purified by flash chromatography (petroleum ether/ethyl acetate = 4/1) and obtained as white solid, 23.6 mg, 55% yield, melting point 154.1 – 154.3 °C. <sup>1</sup>H NMR (500 MHz, CDCl<sub>3</sub>) δ 8.19 – 8.10 (m, 2H), 7.68 (s, 1H), 7.39 – 7.30 (m, 2H), 7.27 – 7.19 (m, 5H), 7.20 – 7.13 (m, 2H), 7.12 – 7.05 (m, 1H), 7.02 – 6.94 (m, 1H), 6.59 (d, *J* = 8.1

Hz, 1H), 6.16 (dd,  $J = 8.7, 5.5$  Hz, 1H), 3.81 (s, 3H), 3.21 (dd,  $J = 12.6, 5.6$  Hz, 1H), 2.94 (dd,  $J = 12.6, 8.7$  Hz, 1H) ppm.  $^{13}\text{C}$  NMR (126 MHz,  $\text{CDCl}_3$ )  $\delta$  195.67, 169.88, 166.0 ( $J_{\text{CF}} = 254.5$  Hz), 165.33, 136.62, 134.87, 134.33, 133.47 ( $J_{\text{CF}} = 2.5$  Hz), 131.40 ( $J_{\text{CF}} = 8.8$  Hz), 130.99, 130.01, 129.85, 129.26, 128.34, 128.3, 126.28, 125.59, 125.35, 115.95 ( $J_{\text{CF}} = 22.7$  Hz), 52.37, 50.47, 41.00 ppm.  $^{19}\text{F}$  NMR (376 MHz,  $\text{CDCl}_3$ )  $\delta$  -105.41 ppm. HRMS (ESI)  $m/z$ :  $[\text{M}+\text{H}]^+$  Calcd for  $\text{C}_{26}\text{H}_{21}\text{FNO}_4$  430.1449; Found 430.1453.

**Methyl 1-benzoyl-2-(2-(4-chlorophenyl)-2-oxoethyl)-1,2-dihydroquinoline-3-carboxylate**

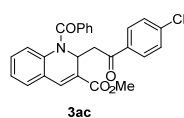

**(3ac):** Purified by flash chromatography (petroleum ether/ethyl acetate = 4/1) and obtained as white oil, 31.2 mg, 70% yield.  $^1\text{H}$  NMR (500 MHz,  $\text{CDCl}_3$ )  $\delta$  8.09 – 8.02 (m, 2H), 7.68 (s, 1H), 7.50 – 7.43 (m, 2H), 7.38 – 7.31 (m, 2H), 7.26 – 7.20 (m, 4H), 7.12 – 7.06 (m, 1H), 7.02 – 6.93 (m, 1H), 6.58 (d,  $J = 8.1$  Hz, 1H), 6.15 (dd,  $J = 8.8, 5.4$  Hz, 1H), 3.82 (s, 3H), 3.21 (dd,  $J = 12.5, 5.5$  Hz, 1H), 2.93 (dd,  $J = 12.6, 8.8$  Hz, 1H) ppm.  $^{13}\text{C}$  NMR (126 MHz,  $\text{CDCl}_3$ )  $\delta$  195.98, 169.81, 165.24, 139.66, 136.54, 135.29, 134.76, 134.30, 130.95, 130.13, 129.97, 129.71, 129.21, 129.11, 128.76, 128.28, 126.21, 125.49, 125.29, 52.32, 50.39, 40.96 ppm. HRMS (ESI)  $m/z$ :  $[\text{M}+\text{H}]^+$  Calcd for  $\text{C}_{26}\text{H}_{21}\text{ClNO}_4$  446.1154; Found 446.1157.

**Methyl 1-benzoyl-2-(2-(4-bromophenyl)-2-oxoethyl)-1,2-dihydroquinoline-3-carboxylate**

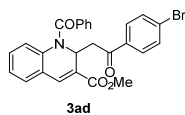

**(3ad):** Purified by flash chromatography (petroleum ether/ethyl acetate = 4/1) and obtained as white solid, 38.1 mg, 78% yield, melting point 127.3 – 127.5 °C.  $^1\text{H}$  NMR (500 MHz,  $\text{CDCl}_3$ )  $\delta$  8.01 – 7.94 (m, 2H), 7.68 (s, 1H), 7.67 – 7.60 (m, 2H), 7.38 – 7.30 (m, 2H), 7.26 – 7.20 (m, 4H), 7.12 – 7.06 (m, 1H), 7.03 – 6.95 (m, 1H), 6.58 (d,  $J = 8.1$  Hz, 1H), 6.14 (dd,  $J = 8.7, 5.4$  Hz, 1H), 3.82 (s, 3H), 3.21 (dd,  $J = 12.5, 5.5$  Hz, 1H), 2.92 (dd,  $J = 12.5, 8.7$  Hz, 1H) ppm.  $^{13}\text{C}$  NMR (126 MHz,  $\text{CDCl}_3$ )  $\delta$  196.19, 169.81, 165.23, 136.54, 135.68, 134.75, 134.31, 132.11, 130.96, 130.25, 129.98, 129.70, 129.22, 128.76, 128.48, 128.29, 126.21, 125.49, 125.29, 52.33, 50.39, 40.95 ppm. HRMS (ESI)  $m/z$ :  $[\text{M}+\text{H}]^+$  Calcd for  $\text{C}_{26}\text{H}_{21}\text{BrNO}_4$  490.0648; Found 490.0654.

**Methyl 1-benzoyl-2-(2-oxo-2-(p-tolyl)ethyl)-1,2-dihydroquinoline-3-carboxylate (3ae):**

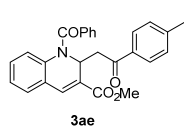

Purified by flash chromatography (petroleum ether/ethyl acetate = 4/1) and obtained as white solid, 35.3 mg, 83% yield, melting point 125.7 – 126.4 °C.  $^1\text{H}$  NMR (500 MHz,  $\text{CDCl}_3$ )  $\delta$  7.97 (d,  $J = 8.1$  Hz, 2H), 7.68 (s, 1H), 7.37 – 7.31 (m, 2H), 7.28 (d,  $J = 8.1$  Hz, 2H), 7.26 – 7.24 (m, 2H), 7.24 – 7.19 (m, 2H), 7.12 – 7.06 (m, 1H), 7.02 – 6.95 (m, 1H), 6.62 (d,  $J = 8.0$  Hz, 1H), 6.18 (dd,  $J = 8.5, 5.6$  Hz, 1H), 3.80 (s, 3H), 3.18 (dd,  $J = 12.7, 5.7$  Hz, 1H), 2.96 (dd,  $J = 12.7, 8.5$  Hz, 1H), 2.41 (s, 3H) ppm.  $^{13}\text{C}$  NMR (126 MHz,  $\text{CDCl}_3$ )  $\delta$  196.80, 169.74, 165.26, 143.97, 136.62, 134.99, 134.53, 134.16, 130.76, 130.13, 129.83, 129.47, 129.15, 128.80, 128.68, 128.22, 126.31, 125.67, 125.22, 52.24, 50.36, 40.77, 21.85 ppm. HRMS (ESI)  $m/z$ :  $[\text{M}+\text{H}]^+$  Calcd for  $\text{C}_{27}\text{H}_{24}\text{NO}_4$  426.1700; Found 426.1701.

**Methyl 1-benzoyl-2-(2-(4-methoxyphenyl)-2-oxoethyl)-1,2-dihydroquinoline-3-carboxylate**

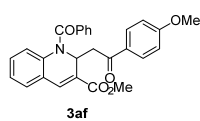

**(3af):** Purified by flash chromatography (petroleum ether/ethyl acetate = 4/1) and obtained as white oil, 36.2 mg, 82% yield.  $^1\text{H}$  NMR (500 MHz,  $\text{CDCl}_3$ )  $\delta$  8.21 – 8.01 (m, 2H), 7.67 (s, 1H), 7.36 – 7.31 (m, 2H), 7.26 – 7.24 (m, 2H), 7.23 – 7.18 (m, 2H), 7.12 – 7.05 (m, 1H), 7.01 – 6.93 (m, 3H), 6.72 – 6.47 (m, 1H), 6.16 (dd,  $J$  = 8.4, 5.8 Hz, 1H), 3.87 (s, 3H), 3.79 (s, 3H), 3.15 (dd,  $J$  = 12.6, 5.8 Hz, 1H), 2.94 (dd,  $J$  = 12.6, 8.5 Hz, 1H) ppm.  $^{13}\text{C}$  NMR (126 MHz,  $\text{CDCl}_3$ )  $\delta$  195.66, 169.74, 165.27, 163.59, 136.61, 134.96, 134.11, 130.96, 130.75, 130.16, 130.11, 129.82, 129.13, 128.67, 128.21, 126.27, 125.65, 125.21, 113.92, 55.56, 52.23, 50.47, 40.71 ppm. HRMS (ESI)  $m/z$ :  $[\text{M}+\text{H}]^+$  Calcd for  $\text{C}_{27}\text{H}_{24}\text{NO}_5$  442.1648; Found 442.1652.

**Methyl 1-benzoyl-2-(2-(naphthalen-1-yl)-2-oxoethyl)-1,2-dihydroquinoline-3-carboxylate**

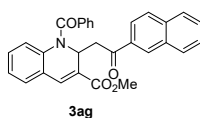

**(3ag):** Purified by flash chromatography (petroleum ether/ethyl acetate = 4/1) and obtained as white oil, 30.9 mg, 67% yield.  $^1\text{H}$  NMR (500 MHz,  $\text{CDCl}_3$ )  $\delta$  8.66 (s, 1H), 8.12 – 8.06 (m, 1H), 8.04 – 7.98 (m, 1H), 7.94 – 7.85 (m, 2H), 7.71 (s, 1H), 7.63 – 7.57 (m, 1H), 7.57 – 7.53 (m, 1H), 7.38 – 7.28 (m, 2H), 7.26 – 7.22 (m, 2H), 7.19 (dd,  $J$  = 8.1, 7.0 Hz, 2H), 7.12 – 7.06 (m, 1H), 7.00 – 6.91 (m, 1H), 6.57 (d,  $J$  = 8.4 Hz, 1H), 6.27 (dd,  $J$  = 8.5, 5.6 Hz, 1H), 3.82 (s, 3H), 3.34 (dd,  $J$  = 12.7, 5.6 Hz, 1H), 3.14 (dd,  $J$  = 12.7, 8.5 Hz, 1H) ppm.  $^{13}\text{C}$  NMR (126 MHz,  $\text{CDCl}_3$ )  $\delta$  197.12, 169.82, 165.24, 136.62, 135.77, 134.91, 134.32, 134.27, 132.76, 130.78, 130.75, 130.04, 129.95, 129.85, 129.12, 128.73, 128.56, 128.55, 128.22, 127.87, 126.72, 126.28, 125.64, 125.24, 124.23, 52.29, 50.63, 40.99 ppm. HRMS (ESI)  $m/z$ :  $[\text{M}+\text{H}]^+$  Calcd for  $\text{C}_{30}\text{H}_{24}\text{NO}_4$  462.1700; Found 462.1704.

**Methyl 1-benzoyl-2-(2-(furan-2-yl)-2-oxoethyl)-1,2-dihydroquinoline-3-carboxylate (3ah):**

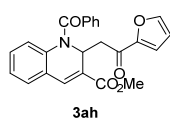

Purified by flash chromatography (petroleum ether/ethyl acetate = 4/1) and obtained as white oil, 34.5 mg, 75% yield.  $^1\text{H}$  NMR (400 MHz,  $\text{CDCl}_3$ )  $\delta$  7.67 (s, 1H), 7.60 (dd,  $J$  = 1.7, 0.7 Hz, 1H), 7.39 – 7.30 (m, 3H), 7.28 (s, 2H), 7.22 (dd,  $J$  = 8.1, 6.8 Hz, 2H), 7.11 – 7.05 (m, 1H), 7.01 – 6.94 (m, 1H), 6.61 (d,  $J$  = 8.1 Hz, 1H), 6.57 – 6.53 (m, 1H), 6.15 (dd,  $J$  = 8.4, 5.5 Hz, 1H), 3.84 (s, 3H), 3.08 (dd,  $J$  = 12.6, 5.5 Hz, 1H), 2.83 (dd,  $J$  = 12.6, 8.5 Hz, 1H) ppm.  $^{13}\text{C}$  NMR (101 MHz,  $\text{CDCl}_3$ )  $\delta$  185.40, 169.78, 165.18, 152.62, 146.81, 136.59, 134.90, 134.29, 130.82, 129.89, 129.78, 129.14, 128.67, 128.25, 126.16, 125.56, 125.26, 118.33, 112.51, 52.33, 50.47, 41.26 ppm. HRMS (ESI)  $m/z$ :  $[\text{M}+\text{H}]^+$  Calcd for  $\text{C}_{24}\text{H}_{20}\text{NO}_5$  402.1336; Found 402.1337.

**Methyl 1-benzoyl-2-(2-oxo-2-(thiophen-2-yl)ethyl)-1,2-dihydroquinoline-3-carboxylate (3ai):**

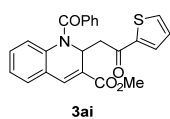

Purified by flash chromatography (petroleum ether/ethyl acetate = 4/1) and obtained as white oil, 29.2 mg, 70% yield.  $^1\text{H}$  NMR (400 MHz,  $\text{CDCl}_3$ )  $\delta$  8.00 – 7.95 (m, 1H), 7.69 (s, 1H), 7.67 – 7.61 (m, 1H), 7.37 – 7.31 (m, 2H), 7.30 – 7.26 (m, 2H),

7.25 – 7.19 (m, 2H), 7.19 – 7.13 (m, 1H), 7.12 – 7.05 (m, 1H), 7.01 – 6.93 (m, 1H), 6.60 (d,  $J = 8.1$  Hz, 1H), 6.18 (dd,  $J = 8.3, 5.6$  Hz, 1H), 3.83 (s, 3H), 3.15 (dd,  $J = 12.4, 5.7$  Hz, 1H), 2.92 (dd,  $J = 12.5, 8.3$  Hz, 1H) ppm.  $^{13}\text{C}$  NMR (101 MHz,  $\text{CDCl}_3$ )  $\delta$  189.88, 169.78, 165.21, 144.71, 136.57, 134.88, 134.35, 134.21, 133.20, 130.85, 129.91, 129.80, 129.15, 128.72, 128.41, 128.26, 126.24, 125.59, 125.26, 52.34, 50.69, 41.88 ppm. HRMS (ESI)  $m/z$ :  $[\text{M}+\text{H}]^+$  Calcd for  $\text{C}_{24}\text{H}_{20}\text{NO}_4\text{S}$  418.1108; Found 418.1108.

**Methyl 1-benzoyl-2-(3,3-dimethyl-2-oxobutyl)-1,2-dihydroquinoline-3-carboxylate (3aj):**

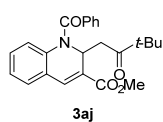

Purified by flash chromatography (petroleum ether/ethyl acetate = 4/1) and obtained as white oil, 32.1 mg, 82% yield.  $^1\text{H}$  NMR (600 MHz,  $\text{CDCl}_3$ )  $\delta$  7.56 (s, 1H), 7.31 – 7.26 (m, 1H), 7.25 – 7.20 (m, 3H), 7.20 – 7.14 (m, 2H), 7.07 – 6.99 (m, 1H), 7.00 – 6.90 (m, 1H), 6.73 (s, 1H), 5.93 (dd,  $J = 9.8, 4.7$  Hz, 1H), 3.80 (s, 3H), 2.70 (dd,  $J = 13.2, 4.7$  Hz, 1H), 2.29 (dd,  $J = 13.2, 9.8$  Hz, 1H), 1.11 (s, 9H) ppm.  $^{13}\text{C}$  NMR (151 MHz,  $\text{CDCl}_3$ )  $\delta$  212.02, 169.82, 165.32, 136.66, 135.30, 133.80, 130.70, 130.63, 129.75, 129.07, 128.47, 128.20, 126.52, 125.85, 125.19, 52.29, 49.48, 45.06, 37.64, 26.02 ppm. HRMS (ESI)  $m/z$ :  $[\text{M}+\text{H}]^+$  Calcd for  $\text{C}_{24}\text{H}_{26}\text{NO}_4$  392.1856; Found 392.1862.

**Characterization Data of the Compounds 5**

**Methyl (*E*)-4-(2-benzamidophenyl)-5-styryl-1-(*p*-tolyl)-4,5-dihydro-1*H*-pyrrole-3 carboxylate**

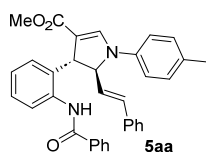

**(5aa):** Purified by flash chromatography (petroleum ether/ethyl acetate = 5/1) and obtained as yellow solid, 46.7 mg, 91% yield, melting point 197.6-197.9 °C.  $^1\text{H}$  NMR (600 MHz,  $\text{CDCl}_3$ )  $\delta$  10.31 – 10.14 (m, 1H), 8.05 – 8.02 (m, 2H), 7.74 (s, 1H), 7.71 (d,  $J = 8.1$  Hz, 1H), 7.43 – 7.37 (m, 3H), 7.23 – 7.04 (m, 10H), 6.94 – 6.91 (m, 2H), 6.39 (d,  $J = 15.9$  Hz, 1H), 6.16 – 6.13 (m, 1H), 5.00 – 4.98 (m, 1H), 4.15 (d,  $J = 2.2$  Hz, 1H), 3.65 (s, 3H), 2.22 (s, 3H) ppm.  $^{13}\text{C}$  NMR (151 MHz,  $\text{CDCl}_3$ )  $\delta$  167.72, 166.11, 141.33, 138.03, 137.57, 135.97, 134.74, 134.70, 132.08, 131.76, 131.73, 130.39, 128.67, 128.65, 128.13, 127.81, 127.67, 126.82, 126.80, 126.68, 126.29, 126.17, 115.71, 109.51, 72.43, 51.47, 47.78, 20.71 ppm. HRMS (ESI)  $m/z$ :  $[\text{M}+\text{H}]^+$  Calcd for  $\text{C}_{34}\text{H}_{31}\text{N}_2\text{O}_3$  515.2329; Found 515.2329.

**Ethyl (*E*)-4-(2-benzamidophenyl)-5-styryl-1-(*p*-tolyl)-4,5-dihydro-1*H*-pyrrole-3-carboxylate**

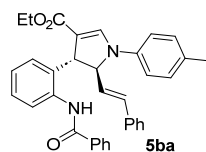

**(5ba):** Purified by flash chromatography (petroleum ether/ethyl acetate = 5/1) and obtained as yellow solid, 47.0 mg, 89% yield, melting point 184.7 – 185.0 °C.  $^1\text{H}$  NMR (600 MHz,  $\text{CDCl}_3$ )  $\delta$  10.39 (s, 1H), 8.14 (d,  $J = 7.6$  Hz, 2H), 7.82 (s, 1H), 7.80 (d,  $J = 8.1$  Hz, 1H), 7.51 (t,  $J = 7.2$  Hz, 1H), 7.47 (t,  $J = 7.4$  Hz, 2H), 7.32 – 7.27 (m, 3H), 7.25 – 7.13 (m, 7H), 7.02 (d,  $J = 8.1$  Hz, 2H), 6.48 (d,  $J = 15.9$  Hz, 1H), 6.26 – 6.22 (m, 1H), 5.07 (d,  $J = 6.9$  Hz, 1H), 4.26 – 4.25 (m, 1H), 4.21 (d,  $J = 2.2$  Hz, 1H), 4.16 – 4.13 (m, 1H), 2.31 (s, 3H), 1.30 (t,  $J = 7.1$  Hz, 3H) ppm.  $^{13}\text{C}$  NMR (151 MHz,  $\text{CDCl}_3$ )  $\delta$  167.45, 166.06, 140.98, 138.08, 137.59, 135.98, 134.76, 134.73, 131.95, 131.71, 131.68, 130.37, 128.67, 128.65, 128.13, 127.84, 127.64, 126.80, 126.74, 126.72, 126.31, 126.07, 115.64, 109.94, 72.42, 60.32, 47.75, 20.73, 14.63 ppm. HRMS (ESI)  $m/z$ :  $[\text{M}+\text{H}]^+$  Calcd for  $\text{C}_{35}\text{H}_{33}\text{N}_2\text{O}_3$  529.2486; Found 529.2485.

**Butyl (E)-4-(2-benzamidophenyl)-5-styryl-1-(p-tolyl)-4,5-dihydro-1H-pyrrole-3-carboxylate**

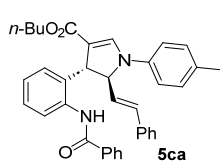

**(5ca):** Purified by flash chromatography (petroleum ether/ethyl acetate = 5/1) and obtained as yellow liquid, 46.1 mg, 83% yield.  $^1\text{H}$  NMR (600 MHz,  $\text{CDCl}_3$ )  $\delta$  10.35 (s, 1H), 8.11 (d,  $J = 7.6$  Hz, 2H), 7.78 (d,  $J = 6.7$  Hz, 2H), 7.49 – 7.43 (m, 3H), 7.30 – 7.27 (m, 3H), 7.25 – 7.14 (m, 4H), 7.12 – 7.10 (m, 3H), 6.99 (d,  $J =$

8.1 Hz, 2H), 6.46 (d,  $J = 15.9$  Hz, 1H), 6.24 – 6.20 (m, 1H), 5.05 (d,  $J = 6.9$  Hz, 1H), 4.21 – 4.17 (m, 2H), 4.06 – 4.02 (m, 1H), 2.29 (s, 3H), 1.66 – 1.61 (m, 2H), 1.42 – 1.35 (m, 2H), 0.94 (t,  $J = 7.4$  Hz, 3H) ppm.  $^{13}\text{C}$  NMR (151 MHz,  $\text{CDCl}_3$ )  $\delta$  167.52, 166.04, 140.91, 138.08, 137.54, 135.97, 134.77, 134.72, 131.95, 131.70, 131.15, 130.36, 128.66, 128.64, 128.12, 127.82, 127.63, 126.79, 126.77, 126.71, 126.34, 126.05, 115.64, 109.91, 72.44, 64.24, 47.82, 31.08, 20.73, 19.41, 13.95 ppm. HRMS (ESI)  $m/z$ :  $[\text{M}+\text{H}]^+$  Calcd for  $\text{C}_{37}\text{H}_{37}\text{N}_2\text{O}_3$  557.2799; Found 557.2798.

**Isobutyl**

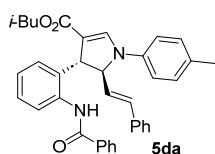

**(E)-4-(2-benzamidophenyl)-5-styryl-1-(p-tolyl)-4,5-dihydro-1H-pyrrole-3-carboxylate (5da):** Purified by flash chromatography (petroleum ether/ethyl acetate = 5/1) and obtained as yellow liquid, 45.5 mg, 82% yield.  $^1\text{H}$  NMR (600 MHz,  $\text{CDCl}_3$ )  $\delta$  10.33 (s, 1H), 8.13 (d,  $J = 7.6$  Hz, 2H), 7.81 – 7.79 (m, 2H), 7.51 – 7.45 (m, 3H), 7.32 – 7.27 (m, 3H), 7.26 – 7.20 (m, 4H), 7.16 – 7.13 (m, 3H), 7.01

(d,  $J = 8.1$  Hz, 2H), 6.48 (d,  $J = 15.9$  Hz, 1H), 6.27 – 6.23 (m, 1H), 5.07 (d,  $J = 6.9$  Hz, 1H), 4.22 (d,  $J = 2.4$  Hz, 1H), 4.01 – 3.98 (m, 1H), 3.85 – 3.82 (m, 1H), 2.31 (s, 3H), 1.99 – 1.95 (m, 1H), 0.96 (t,  $J = 7.4$  Hz, 6H) ppm.  $^{13}\text{C}$  NMR (151 MHz,  $\text{CDCl}_3$ )  $\delta$  167.17, 166.04, 140.89, 138.09, 137.55, 135.98, 134.79, 134.71, 131.99, 131.74, 131.70, 130.39, 130.36, 128.84, 128.67, 128.14, 127.81, 127.64, 127.08, 126.80, 126.72, 126.37, 126.07, 115.67, 72.47, 70.50, 28.08, 20.74, 19.47, 19.41 ppm. HRMS (ESI)  $m/z$ :  $[\text{M}+\text{H}]^+$  Calcd for  $\text{C}_{37}\text{H}_{37}\text{N}_2\text{O}_3$  557.2799; Found 557.2799.

**Tert-butyl**

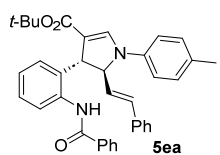

**(E)-4-(2-benzamidophenyl)-5-styryl-1-(p-tolyl)-4,5-dihydro-1H-pyrrole-3-carboxylate (5ea):** Purified by flash chromatography (petroleum ether/ethyl acetate = 5/1) and obtained as yellow liquid, 45.1 mg, 81% yield.  $^1\text{H}$  NMR (600 MHz,  $\text{CDCl}_3$ )  $\delta$  10.59 (s, 1H), 8.16 (d,  $J = 7.5$  Hz, 2H), 7.82 (d,  $J = 8.1$  Hz, 1H), 7.68 (s, 1H), 7.52 – 7.44 (m, 3H), 7.31 – 7.27 (m, 4H), 7.25 – 7.18 (m, 3H), 7.13

(t,  $J = 8.7$  Hz, 3H), 6.99 (d,  $J = 8.0$  Hz, 2H), 6.47 (d,  $J = 15.9$  Hz, 1H), 6.26 – 6.22 (m, 1H), 5.03 (d,  $J = 6.9$  Hz, 1H), 4.16 (d,  $J = 2.3$  Hz, 1H), 2.31 (s, 3H), 1.50 (s, 9H) ppm.  $^{13}\text{C}$  NMR (151 MHz,  $\text{CDCl}_3$ )  $\delta$  167.25, 166.05, 140.57, 140.20, 138.28, 136.06, 135.29, 134.87, 133.31, 131.64, 131.60, 131.55, 130.31, 128.65, 128.62, 128.54, 128.08, 127.94, 127.50, 127.05, 126.80, 126.47, 125.67, 115.47, 80.54, 72.58, 36.35, 28.65, 20.72 ppm. HRMS (ESI)  $m/z$ :  $[\text{M}+\text{H}]^+$  Calcd for  $\text{C}_{37}\text{H}_{37}\text{N}_2\text{O}_3$  557.2799; Found 557.2797.

**Benzyl (*E*)-4-(2-benzamidophenyl)-5-styryl-1-(*p*-tolyl)-4,5-dihydro-1*H*-pyrrole-3-carboxylate**

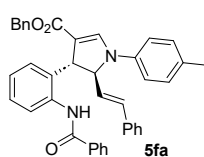

**(5fa):** Purified by flash chromatography (petroleum ether/ethyl acetate = 5/1) and obtained as yellow liquid, 51.4 mg, 87% yield. <sup>1</sup>H NMR (600 MHz, CDCl<sub>3</sub>) δ 10.24 (s, 1H), 8.10 (d, *J* = 7.6 Hz, 2H), 7.83 – 7.78 (m, 2H), 7.51 (t, *J* = 7.3 Hz, 1H), 7.45 (t, *J* = 7.5 Hz, 2H), 7.42 – 7.29 (m, 6H), 7.29 – 7.27 (m, 1H), 7.26 – 7.20 (m, 4H),

7.19 – 7.10 (m, 4H), 6.99 (d, *J* = 8.1 Hz, 2H), 6.46 (d, *J* = 15.9 Hz, 1H), 6.24 – 6.21 (m, 1H), 5.27 (d, *J* = 12.3 Hz, 1H), 5.07 – 5.03 (m, 2H), 4.23 (d, *J* = 2.3 Hz, 1H), 2.29 (s, 3H) ppm. <sup>13</sup>C NMR (151 MHz, CDCl<sub>3</sub>) δ 167.21, 166.07, 141.61, 137.93, 137.57, 136.50, 135.94, 134.77, 134.68, 132.16, 131.79, 131.73, 130.45, 130.36, 129.83, 128.68, 128.66, 128.35, 128.14, 127.81, 127.71, 126.83, 126.81, 126.72, 126.42, 126.11, 115.77, 109.32, 72.54, 66.27, 47.40, 20.73 ppm. HRMS (ESI) *m/z*: [M+H]<sup>+</sup> Calcd for C<sub>40</sub>H<sub>35</sub>N<sub>2</sub>O<sub>3</sub> 591.2642; Found 591.2644.

**Methyl (*E*)-4-(2-(4-fluorobenzamido)phenyl)-5-styryl-1-(*p*-tolyl)-4,5-dihydro-1*H*-pyrrole-3-**

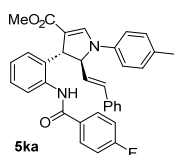

**carboxylate (5ka):** Purified by flash chromatography (petroleum ether/ethyl acetate = 5/1) and obtained as yellow liquid, 46.1 mg, 85% yield, melting point 200.3-201.9 °C. <sup>1</sup>H NMR (600 MHz, CDCl<sub>3</sub>) δ 10.38 (s, 1H), 8.07 (d, *J* = 8.3 Hz, 2H), 7.81 (s, 1H), 7.76 (d, *J* = 8.0 Hz, 1H), 7.43 – 7.41 (m, 2H), 7.30 – 7.26 (m, 4H), 7.25 – 7.18 (m,

3H), 7.18 – 7.11 (m, 3H), 7.00 (d, *J* = 8.5 Hz, 2H), 6.46 (d, *J* = 15.9 Hz, 1H), 6.23 – 6.20 (m, 1H), 5.07 – 5.05 (m, 1H), 4.17 (d, *J* = 2.1 Hz, 1H), 3.72 (s, 3H), 2.30 (s, 3H) ppm. <sup>13</sup>C NMR (151 MHz, CDCl<sub>3</sub>) δ 167.91, 165.04, 141.43, 137.98, 137.95, 137.49, 135.93, 134.56, 133.15, 132.21, 131.83, 130.41, 129.30, 128.91, 128.70, 128.21, 127.72, 126.92, 126.78, 126.60, 126.30, 126.03, 115.74, 109.35, 72.41, 51.54, 47.78, 20.72 ppm. <sup>19</sup>F NMR (376 MHz, CDCl<sub>3</sub>) δ -108.44 ppm. HRMS (ESI) *m/z*: [M+H]<sup>+</sup> Calcd for C<sub>34</sub>H<sub>30</sub>FN<sub>2</sub>O<sub>3</sub> 533.2235; Found 533.2238.

**Methyl (*E*)-4-(2-(4-chlorobenzamido)phenyl)-5-styryl-1-(*p*-tolyl)-4,5-dihydro-1*H*-pyrrole-3-**

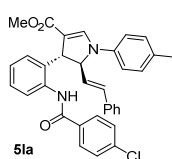

**carboxylate (5la):** Purified by flash chromatography (petroleum ether/ethyl acetate = 5/1) and obtained as yellow liquid, 46.7 mg, 85% yield, melting point 208.7-210.0 °C. <sup>1</sup>H NMR (600 MHz, CDCl<sub>3</sub>) δ 10.38 (s, 1H), 8.08 (d, *J* = 8.3 Hz, 2H), 7.82 – 7.76 (m, 2H), 7.44 – 7.43 (m, 2H), 7.31 – 7.26 (m, 3H), 7.25 – 7.13 (m, 7H), 7.01 (d, *J* =

8.5 Hz, 2H), 6.47 (d, *J* = 15.9 Hz, 1H), 6.25 – 6.21 (m, 1H), 5.07 (d, *J* = 6.6 Hz, 1H), 4.18 (d, *J* = 2.1 Hz, 1H), 3.73 (s, 3H), 2.31 (s, 3H) ppm. <sup>13</sup>C NMR (126 MHz, CDCl<sub>3</sub>) δ 167.94, 165.05, 141.39, 137.98, 137.92, 137.49, 135.90, 134.50, 133.12, 132.21, 131.79, 130.41, 129.31, 128.93, 128.71, 128.23, 127.73, 126.93, 126.78, 126.53, 126.29, 126.02, 115.71, 109.36, 72.38, 51.57, 47.70, 20.74 ppm. HRMS (ESI) *m/z*: [M+H]<sup>+</sup> Calcd for C<sub>34</sub>H<sub>30</sub>ClN<sub>2</sub>O<sub>3</sub> 549.1939; Found 549.1942.

**Methyl (E)-4-(2-(4-chlorobenzamido)phenyl)-5-styryl-1-(p-tolyl)-4,5-dihydro-1H-pyrrole-3-**

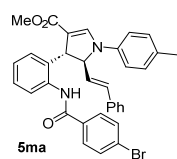

**carboxylate (5ma):** Purified by flash chromatography (petroleum ether/ethyl acetate = 5/1) and obtained as yellow liquid, 50.4 mg, 87% yield, melting point 216.1-218.0 °C. <sup>1</sup>H NMR (600 MHz, CDCl<sub>3</sub>) δ 10.3 (s, 1H), 7.98 (d, *J* = 8.2 Hz, 2H), 7.80 (s, 1H), 7.75 – 7.74 (m, 1H), 7.58 – 7.56 (m, 2H), 7.29 – 7.26 (m, 4H), 7.25 – 7.10 (m, 6H), 6.99 – 6.98 (m, 2H), 6.45 (d, *J* = 15.9 Hz, 1H), 6.22 – 6.18 (m, 1H), 5.05 – 5.04 (m, 1H), 4.15 (d, *J* = 2.1 Hz, 1H), 3.71 (s, 3H), 2.28 (s, 3H) ppm. <sup>13</sup>C NMR (151 MHz, CDCl<sub>3</sub>) δ 167.91, 165.13, 141.42, 137.95, 137.47, 135.92, 134.54, 133.62, 132.21, 131.89, 131.83, 130.41, 129.49, 128.70, 128.22, 127.72, 126.92, 126.78, 126.59, 126.51, 126.31, 126.01, 115.74, 109.34, 72.40, 51.54, 47.79, 20.72 ppm. HRMS (ESI) *m/z*: [M+H]<sup>+</sup> Calcd for C<sub>34</sub>H<sub>30</sub>BrN<sub>2</sub>O<sub>3</sub> 593.1434; Found 593.1434.

**Methyl (E)-4-(2-(4-methylbenzamido)phenyl)-5-styryl-1-(p-tolyl)-4,5-dihydro-1H-pyrrole-3-**

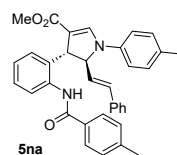

**carboxylate (5na):** Purified by flash chromatography (petroleum ether/ethyl acetate = 5/1) and obtained as yellow liquid, 46.1 mg, 90% yield. <sup>1</sup>H NMR (600 MHz, CDCl<sub>3</sub>) δ 10.20 (s, 1H), 8.01 (d, *J* = 7.9 Hz, 2H), 7.81 – 7.77 (m, 2H), 7.30 – 7.26 (m, 4H), 7.25 – 7.16 (m, 5H), 7.15 – 7.11 (m, 3H), 6.99 (d, *J* = 8.4 Hz, 2H), 6.45 (d, *J* = 15.9 Hz, 1H), 6.23 – 6.19 (m, 1H), 5.05 – 5.04 (m, 1H), 4.21 (d, *J* = 2.2 Hz, 1H), 3.72 (s, 3H), 2.38 (s, 3H), 2.29 (s, 3H) ppm. <sup>13</sup>C NMR (151 MHz, CDCl<sub>3</sub>) δ 167.67, 166.08, 142.11, 141.29, 138.05, 137.47, 135.98, 134.85, 132.04, 131.96, 131.73, 130.37, 128.63, 128.10, 127.80, 127.64, 126.80, 126.67, 126.27, 126.14, 115.69, 109.52, 72.44, 51.45, 47.79, 21.60, 20.71 ppm. HRMS (ESI) *m/z*: [M+H]<sup>+</sup> Calcd for C<sub>35</sub>H<sub>33</sub>N<sub>2</sub>O<sub>3</sub> 529.2486; Found 529.2486.

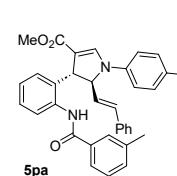

**Methyl (E)-4-(2-(3-methylbenzamido)phenyl)-5-styryl-1-(p-tolyl)-4,5-dihydro-1H-pyrrole-3-carboxylate (5pa):** Purified by flash chromatography (petroleum ether/ethyl acetate = 5/1) and obtained as yellow liquid, 43.9 mg, 83% yield. <sup>1</sup>H NMR (500 MHz, CDCl<sub>3</sub>) δ 9.64 (s, 1H), 7.84 – 7.80 (m, 2H), 7.68 – 7.66 (m, 1H), 7.34 – 7.27 (m, 6H), 7.24 – 7.12 (m, 7H), 7.02 – 6.99 (m, 2H), 6.52 (d, *J* = 16.0 Hz, 1H), 6.29 – 6.24 (m, 1H), 5.08 – 5.06 (m, 1H), 4.24 (d, *J* = 2.5 Hz, 1H), 3.64 (s, 3H), 2.54 (s, 3H), 2.31 (s, 3H) ppm. <sup>13</sup>C NMR (126 MHz, CDCl<sub>3</sub>) δ 168.91, 167.29, 141.25, 138.02, 137.37, 137.15, 136.21, 135.97, 134.57, 131.99, 131.80, 131.38, 130.36, 130.31, 130.23, 128.70, 128.17, 127.71, 127.41, 126.94, 126.76, 126.54, 125.94, 125.87, 115.62, 109.35, 72.37, 51.34, 48.02, 20.72, 20.40 ppm. HRMS (ESI) *m/z*: [M+H]<sup>+</sup> Calcd for C<sub>35</sub>H<sub>33</sub>N<sub>2</sub>O<sub>3</sub> 529.2486; Found 529.2486.

**Methyl (E)-5-styryl-4-(2-(thiophene-2-carboxamido)phenyl)-1-(p-tolyl)-4,5-dihydro-1H-**

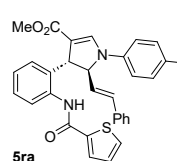

**pyrrole-3-carboxylate (5ra):** Purified by flash chromatography (petroleum ether/ethyl acetate = 5/1) and obtained as yellow liquid, 37.5 mg, 72% yield. <sup>1</sup>H NMR (500 MHz, CDCl<sub>3</sub>) δ 10.41 (s, 1H), 7.94 – 7.93 (m, 1H), 7.83 (s, 1H), 7.78 – 7.77 (m,



1H), 7.52 – 7.51 (m, 1H), 7.31 – 7.26 (m, 4H), 7.25 (d,  $J = 6.0$  Hz, 1H), 7.24 – 7.19 (m, 2H), 7.15 – 7.11 (m, 4H), 7.03 (d,  $J = 2.2$  Hz, 2H), 6.48 (d,  $J = 15.8$  Hz, 1H), 6.27 – 6.23 (m, 1H), 5.09 – 5.07 (m, 1H), 4.22 (d,  $J = 2.3$  Hz, 1H), 3.75 (s, 3H), 2.31 (s, 3H) ppm.  $^{13}\text{C}$  NMR (126 MHz,  $\text{CDCl}_3$ )  $\delta$  167.97, 160.82, 141.36, 140.48, 137.94, 137.34, 135.93, 134.35, 132.15, 131.73, 130.83, 130.41, 129.89, 128.69, 128.63, 128.18, 127.98, 127.71, 126.81, 126.53, 126.22, 125.86, 115.69, 109.44, 72.43, 51.58, 47.61, 20.74 ppm. HRMS (ESI)  $m/z$ :  $[\text{M}+\text{H}]^+$  Calcd for  $\text{C}_{32}\text{H}_{29}\text{N}_2\text{O}_3$  521.1893; Found 521.1894.

**Methyl (E)-4-(2-pivalamidophenyl)-5-styryl-1-(p-tolyl)-4,5-dihydro-1H-pyrrole-3-**

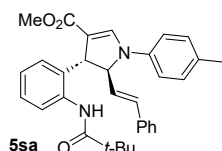

**carboxylate (5sa):** Purified by flash chromatography (petroleum ether/ethyl acetate = 5/1) and obtained as yellow liquid, 46.1 mg, 82% yield.  $^1\text{H}$  NMR (500 MHz,  $\text{CDCl}_3$ )  $\delta$  9.44 (s, 1H), 7.84 (s, 1H), 7.61 (d,  $J = 8.1$  Hz, 1H), 7.36 – 7.30 (m, 4H), 7.25 – 7.22 (m, 2H), 7.20 – 7.11 (m, 4H), 7.05 – 7.02 (m, 2H), 6.53 (d,  $J = 16.0$  Hz, 1H), 6.31 – 6.27 (m, 1H), 5.06 – 5.05 (m, 1H), 4.16 (d,  $J = 2.3$  Hz, 1H), 3.71 (s, 3H), 2.34 (s, 3H), 1.38 (s, 9H) ppm.  $^{13}\text{C}$  NMR (126 MHz,  $\text{CDCl}_3$ )  $\delta$  178.22, 167.53, 141.21, 138.31, 137.99, 136.35, 134.87, 132.17, 131.88, 130.61, 128.96, 128.37, 127.69, 127.21, 126.98, 126.92, 126.65, 126.32, 115.83, 110.06, 72.53, 51.56, 47.88, 39.86, 28.06, 20.95 ppm. HRMS (ESI)  $m/z$ :  $[\text{M}+\text{H}]^+$  Calcd for  $\text{C}_{32}\text{H}_{35}\text{N}_2\text{O}_3$  495.2624; Found 495.2629.

**Methyl (E)-4-(2-benzamidophenyl)-1-(4-methoxyphenyl)-5-styryl-4,5-dihydro-1H-pyrrole-3-**

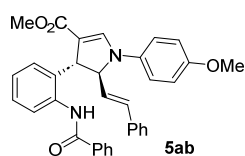

**carboxylate (5ab):** Purified by flash chromatography (petroleum ether/ethyl acetate = 5/1) and obtained as yellow liquid, 48.9 mg, 92% yield.  $^1\text{H}$  NMR (500 MHz,  $\text{CDCl}_3$ )  $\delta$  10.35 (s, 1H), 8.15 – 8.14 (m, 2H), 7.81 – 7.76 (m, 1H), 7.76 (s, 1H), 7.52 – 7.46 (m, 3H), 7.32 – 7.26 (m, 4H), 7.25 – 7.17 (m, 4H), 7.07 – 7.05 (m, 2H), 6.89 – 6.87 (m, 2H), 6.48 (d,  $J = 15.8$  Hz, 1H), 6.27 – 6.22 (m, 1H), 5.05 – 5.03 (m, 1H), 4.23 (d,  $J = 2.2$  Hz, 1H), 3.79 (s, 3H), 3.73 (s, 3H) ppm.  $^{13}\text{C}$  NMR (126 MHz,  $\text{CDCl}_3$ )  $\delta$  167.75, 166.06, 155.47, 141.82, 137.61, 135.90, 134.70, 134.66, 134.63, 134.11, 131.81, 131.72, 129.11, 128.66, 128.16, 127.80, 127.65, 126.78, 126.70, 126.26, 126.13, 117.30, 115.15, 108.84, 72.91, 55.71, 51.44, 47.76 ppm. HRMS (ESI)  $m/z$ :  $[\text{M}+\text{H}]^+$  Calcd for  $\text{C}_{34}\text{H}_{31}\text{N}_2\text{O}_4$  531.2278; Found 531.2280.

**Methyl (E)-4-(2-benzamidophenyl)-1-phenyl-5-styryl-4,5-dihydro-1H-pyrrole-3-carboxylate**

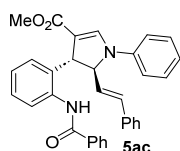

**(5ac):** Purified by flash chromatography (petroleum ether/ethyl acetate = 5/1) and obtained as yellow liquid, 43.8 mg, 82% yield.  $^1\text{H}$  NMR (500 MHz,  $\text{CDCl}_3$ )  $\delta$  10.30 (s, 1H), 8.15 (dd,  $J = 8.3, 1.5$  Hz, 2H), 7.87 (s, 1H), 7.83-7.79 (m, 1H), 7.56 – 7.45 (m, 3H), 7.37 – 7.26 (m, 6H), 7.25 – 7.14 (m, 4H), 7.14 – 7.09 (m, 2H), 7.06 – 6.98 (m, 1H), 6.50 (d,  $J = 15.9$  Hz, 1H), 6.25 (dd,  $J = 16.0, 6.8$  Hz, 1H), 5.11 (d,  $J = 6.1$  Hz, 1H), 4.25 (d,  $J = 2.2$  Hz, 1H), 3.75 (s, 3H) ppm.  $^{13}\text{C}$  NMR (126 MHz,  $\text{CDCl}_3$ )  $\delta$  167.67, 166.09, 140.93, 140.32, 137.41, 135.86, 134.69, 134.63, 131.77, 131.75, 129.87, 128.68, 128.66, 128.17, 127.78, 127.73, 126.84, 126.78, 126.46, 126.26, 126.17,

122.33, 115.54, 110.25, 72.26, 51.57, 47.73 ppm. HRMS (ESI)  $m/z$ :  $[M+H]^+$  Calcd for  $C_{33}H_{29}N_2O_3$  501.2173; Found 501.2170.

**Methyl (E)-4-(2-benzamidophenyl)-1-(naphthalen-1-yl)-5-styryl-4,5-dihydro-1H-pyrrole-3-**

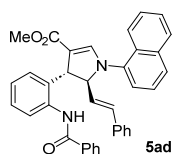

**carboxylate (5ad):** Purified by flash chromatography (petroleum ether/ethyl acetate = 5/1) and obtained as yellow solid, 39.6 mg, 72% yield, melting point 189.3-191.0 °C.

$^1H$  NMR (500 MHz,  $CDCl_3$ )  $\delta$  10.22 (s, 1H), 8.17 – 8.07 (m, 3H), 7.92 – 7.84 (m, 2H), 7.72 (t,  $J$  = 6.8 Hz, 2H), 7.63 (s, 1H), 7.62 – 7.58 (m, 1H), 7.56 – 7.49 (m, 2H), 7.48 – 7.40 (m, 4H), 7.39 – 7.35 (m, 1H), 7.33 – 7.29 (m, 1H), 7.20 – 7.11 (m, 5H), 6.40 – 6.21 (m, 2H), 5.22 (dd,  $J$  = 8.2, 3.1 Hz, 1H), 4.45 (d,  $J$  = 3.1 Hz, 1H), 3.73 (s, 3H) ppm.  $^{13}C$  NMR (126 MHz,  $CDCl_3$ )  $\delta$  167.77, 165.95, 148.61, 137.89, 137.55, 135.92, 135.15, 134.95, 134.73, 132.97, 131.71, 129.47, 129.02, 128.98, 128.67, 128.55, 128.09, 127.76, 127.68, 126.96, 126.93, 126.88, 126.76, 126.68, 126.55, 126.16, 125.60, 122.69, 121.51, 107.96, 76.99, 51.40, 47.82 ppm. HRMS (ESI)  $m/z$ :  $[M+H]^+$  Calcd for  $C_{37}H_{31}N_2O_3$  551.2329; Found 551.2326.

**Methyl (E)-4-(2-benzamidophenyl)-1-benzyl-5-styryl-4,5-dihydro-1H-pyrrole-3-carboxylate**

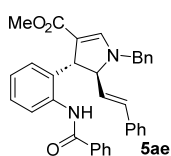

**(5ae):** Purified by flash chromatography (petroleum ether/ethyl acetate = 5/1) and

obtained as yellow solid, 42.0 mg, 82% yield, melting point 170.9-172.3 °C.  $^1H$  NMR (600 MHz,  $CDCl_3$ )  $\delta$  10.30 (s, 1H), 8.10 (d,  $J$  = 7.6 Hz, 2H), 7.76 (d,  $J$  = 8.1 Hz, 1H), 7.55 – 7.36 (m, 6H), 7.35 – 7.27 (m, 6H), 7.26 – 7.21 (m, 3H), 7.08 – 7.01 (m, 2H), 6.41 (d,  $J$  = 15.7 Hz, 1H), 6.17 (dd,  $J$  = 15.8, 8.7 Hz, 1H), 4.48 – 4.37 (m, 2H), 4.28 (d,  $J$  = 14.5 Hz, 1H), 4.21 (d,  $J$  = 3.5 Hz, 1H), 3.66 (s, 3H) ppm.  $^{13}C$  NMR (126 MHz,  $CDCl_3$ )  $\delta$  167.69, 165.82, 149.20, 135.92, 135.87, 134.95, 134.81, 133.60, 133.55, 131.61, 129.16, 128.74, 128.71, 128.61, 128.46, 128.32, 128.00, 127.77, 127.26, 126.85, 126.65, 126.25, 126.05, 125.78, 73.26, 60.54, 51.85, 51.05 ppm. HRMS (ESI)  $m/z$ :  $[M+H]^+$  Calcd for  $C_{34}H_{31}N_2O_3$  515.2329; Found 515.2333.

**Methyl (E)-4-(2-benzamidophenyl)-5-(4-methoxystyryl)-1-(p-tolyl)-4,5-dihydro-1H-pyrrole-**

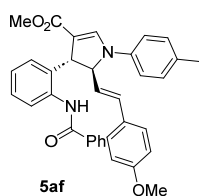

**3-carboxylate (5af):** Purified by flash chromatography (petroleum ether/ethyl

acetate = 5/1) and obtained as yellow solid, 45.0 mg, 82% yield, melting point 146.0-147.3 °C.  $^1H$  NMR (500 MHz,  $CDCl_3$ )  $\delta$  10.30 (s, 1H), 8.14 (d,  $J$  = 6.9 Hz, 2H), 7.83 – 7.77 (m, 2H), 7.54 – 7.45 (m, 3H), 7.33 – 7.28 (m, 1H), 7.24 – 7.19 (m, 3H), 7.17 – 7.11 (m, 3H), 7.05 – 6.97 (m, 2H), 6.82 – 6.75 (m, 2H), 6.42 (d,  $J$  = 15.9 Hz, 1H), 6.08 (dd,  $J$  = 15.9, 7.0 Hz, 1H), 5.09 – 5.01 (m, 1H), 4.20 (d,  $J$  = 2.1 Hz, 1H), 3.76 (s, 3H), 3.73 (s, 3H), 2.31 (s, 3H) ppm.  $^{13}C$  NMR (126 MHz,  $CDCl_3$ )  $\delta$  167.78, 166.05, 159.63, 141.25, 138.04, 137.61, 134.71, 132.00, 131.72, 131.21, 130.36, 128.69, 128.67, 128.03, 127.81, 127.62, 126.77, 126.27, 126.08, 124.42, 115.69, 114.06, 110.43, 109.47, 72.60, 55.43, 51.49, 47.82, 20.73 ppm. HRMS (ESI)  $m/z$ :  $[M+H]^+$  Calcd for  $C_{35}H_{33}N_2O_4$  545.2435; Found 545.2438.

**Methyl (*E*)-4-(2-benzamidophenyl)-5-(4-methylstyryl)-1-(*p*-tolyl)-4,5-dihydro-1*H*-pyrrole-3-**

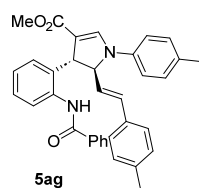

**carboxylate (5ag):** Purified by flash chromatography (petroleum ether/ethyl acetate = 5/1) and obtained as yellow solid, 41.2 mg, 78% yield, melting point 148.6-149.1 °C. <sup>1</sup>H NMR (500 MHz, CDCl<sub>3</sub>) δ 10.33 (s, 1H), 8.14 (d, *J* = 7.9 Hz, 2H), 7.86 – 7.75 (m, 2H), 7.55 – 7.43 (m, 3H), 7.33 – 7.28 (m, 1H), 7.24 – 7.20 (m, 1H), 7.19 – 7.10 (m, 5H), 7.05 (d, *J* = 7.9 Hz, 2H), 7.03 – 6.99 (m, 2H), 6.44 (d, *J* = 15.9 Hz, 1H), 6.17 (dd, *J* = 15.9, 6.9 Hz, 1H), 5.10 – 5.02 (m, 1H), 4.21 (d, *J* = 2.1 Hz, 1H), 3.73 (s, 3H), 2.31 (s, 3H), 2.28 (s, 3H) ppm. <sup>13</sup>C NMR (126 MHz, CDCl<sub>3</sub>) δ 167.77, 166.07, 141.26, 138.08, 138.02, 137.58, 134.70, 133.14, 132.03, 131.72, 131.64, 130.36, 129.94, 129.35, 128.67, 127.81, 127.64, 126.78, 126.70, 126.27, 126.09, 125.58, 115.70, 109.51, 72.54, 51.50, 47.74, 21.30, 20.73 ppm. HRMS (ESI) *m/z*: [M+H]<sup>+</sup> Calcd for C<sub>35</sub>H<sub>33</sub>N<sub>2</sub>O<sub>3</sub> 529.2486; Found 529.2488;

**Methyl (*E*)-4-(2-benzamidophenyl)-5-(4-fluorostyryl)-1-(*p*-tolyl)-4,5-dihydro-1*H*-pyrrole-3-**

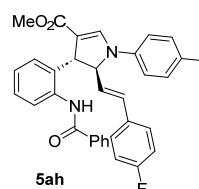

**carboxylate (5ah):** Purified by flash chromatography (petroleum ether/ethyl acetate = 5/1) and obtained as yellow solid, 25.5 mg, 48% yield, melting point 143.0-144.8 °C. <sup>1</sup>H NMR (600 MHz, CDCl<sub>3</sub>) δ 10.30 (s, 1H), 8.14 (d, *J* = 7.2 Hz, 2H), 7.82 (s, 1H), 7.78 (d, *J* = 8.1 Hz, 1H), 7.54 – 7.45 (m, 3H), 7.32 – 7.28 (m, 1H), 7.25 – 7.20 (m, 3H), 7.17 – 7.11 (m, 3H), 7.03 – 6.97 (m, 2H), 6.96 – 6.88 (m, 2H), 6.43 (d, *J* = 15.9 Hz, 1H), 6.13 (dd, *J* = 15.9, 6.9 Hz, 1H), 5.07 – 5.04 (m, 1H), 4.20 (d, *J* = 2.2 Hz, 1H), 3.73 (s, 3H), 2.31 (s, 3H) ppm. <sup>13</sup>C NMR (126 MHz, CDCl<sub>3</sub>) δ 167.73, 166.09, 162.63 (d, *J* = 247.8 Hz), 141.24, 137.95, 137.54, 134.69, 134.67, 132.11, 132.08, 131.79, 130.58, 130.42, 128.70, 128.39 (d, *J* = 8.0 Hz), 127.81, 127.72, 126.87, 126.36 (d, *J* = 3.0 Hz), 126.25, 126.21, 115.58 (d, *J* = 22.6 Hz), 115.63, 109.51, 72.31, 51.53, 47.70, 20.74 ppm. <sup>19</sup>F NMR (565 MHz, CDCl<sub>3</sub>) δ -113.67 ppm. HRMS (ESI) *m/z*: [M+H]<sup>+</sup> Calcd for C<sub>34</sub>H<sub>30</sub>FN<sub>2</sub>O<sub>3</sub> 533.2235; Found 533.2230;

**Methyl (*E*)-4-(2-benzamidophenyl)-5-(3-methoxystyryl)-1-(*p*-tolyl)-4,5-dihydro-1*H*-pyrrole-**

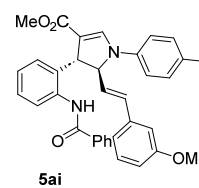

**3-carboxylate (5ai):** Purified by flash chromatography (petroleum ether/ethyl acetate = 5/1) and obtained as yellow solid, 44.9 mg, 82% yield, melting point 133.6-134.5 °C. <sup>1</sup>H NMR (500 MHz, CDCl<sub>3</sub>) δ 10.32 (s, 1H), 8.19 – 8.07 (m, 2H), 7.85 – 7.76 (m, 2H), 7.54 – 7.45 (m, 3H), 7.33 – 7.28 (m, 1H), 7.23 – 7.19 (m, 1H), 7.18 – 7.11 (m, 4H), 7.03 – 6.97 (m, 2H), 6.89 – 6.85 (m, 1H), 6.83 – 6.78 (m, 1H), 6.78 – 6.71 (m, 1H), 6.44 (d, *J* = 15.9 Hz, 1H), 6.22 (dd, *J* = 15.9, 6.8 Hz, 1H), 5.10 – 5.02 (m, 1H), 4.21 (d, *J* = 2.2 Hz, 1H), 3.75 (s, 3H), 3.73 (s, 3H), 2.31 (s, 3H) ppm. <sup>13</sup>C NMR (126 MHz, CDCl<sub>3</sub>) δ 167.75, 166.10, 159.87, 141.25, 137.99, 137.53, 137.35, 134.70, 134.68, 132.09, 131.76, 131.64, 130.40, 129.66, 128.69, 127.82, 127.69, 126.89, 126.82, 126.26, 126.14, 119.48, 115.67, 114.15, 111.74, 109.56, 72.38, 55.36, 51.52, 47.68, 20.74 ppm. HRMS (ESI) *m/z*: [M+H]<sup>+</sup> Calcd for C<sub>35</sub>H<sub>33</sub>N<sub>2</sub>O<sub>4</sub> 545.2435; Found 545.2433.

**Methyl (*E*)-4-(2-benzamidophenyl)-5-(2-methoxystyryl)-1-(*p*-tolyl)-4,5-dihydro-1*H*-pyrrole-3-carboxylate (**5aj**):**

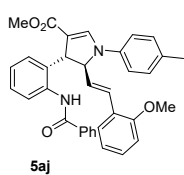

Purified by flash chromatography (petroleum ether/ethyl acetate = 5/1) and obtained as yellow solid, 43.6 mg, 80% yield, melting point 150.6-152.3 °C. <sup>1</sup>H NMR (500 MHz, CDCl<sub>3</sub>) δ 10.34 (s, 1H), 8.13 (d, *J* = 7.0 Hz, 2H), 7.83 – 7.78 (m, 2H), 7.52 – 7.43 (m, 3H), 7.32 – 7.28 (m, 2H), 7.24 – 7.21 (m, 1H), 7.19 – 7.10 (m, 4H), 7.05 – 7.01 (m, 2H), 6.86 – 6.77 (m, 3H), 6.28 (dd, *J* = 16.1, 7.4 Hz, 1H), 5.08 (dd, *J* = 7.1, 2.8 Hz, 1H), 4.23 (d, *J* = 2.1 Hz, 1H), 3.74 (s, 3H), 3.73 (s, 3H), 2.30 (s, 3H) ppm. <sup>13</sup>C NMR (126 MHz, CDCl<sub>3</sub>) δ 167.80, 166.01, 157.06, 141.37, 138.12, 137.58, 134.79, 134.72, 131.96, 131.68, 130.32, 129.19, 128.64, 127.82, 127.59, 127.31, 127.18, 126.69, 126.37, 126.34, 125.94, 124.88, 120.58, 115.83, 111.06, 109.83, 73.20, 55.50, 51.47, 47.06, 20.74 ppm. HRMS (ESI) *m/z*: [M+H]<sup>+</sup> Calcd for C<sub>35</sub>H<sub>33</sub>N<sub>2</sub>O<sub>4</sub> 545.2435; Found 545.2438.

**Methyl (*E*)-4-(2-benzamidophenyl)-5-(2-(furan-2-yl)vinyl)-1-(*p*-tolyl)-4,5-dihydro-1*H*-pyrrole-3-carboxylate (**5ak**):**

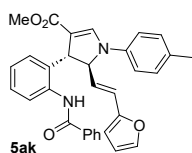

Purified by flash chromatography (petroleum ether/ethyl acetate = 5/1) and obtained as yellow solid, 37.3 mg, 74% yield, melting point 179.0-180.6 °C. <sup>1</sup>H NMR (500 MHz, CDCl<sub>3</sub>) δ 10.32 (s, 1H), 8.15 (d, *J* = 6.8 Hz, 2H), 7.84 – 7.72 (m, 2H), 7.56 – 7.46 (m, 3H), 7.33 – 7.27 (m, 2H), 7.22 – 7.18 (m, 1H), 7.17 – 7.11 (m, 3H), 7.02 – 6.94 (m, 2H), 6.32 – 6.23 (m, 2H), 6.20 – 6.11 (m, 2H), 5.03 (dd, *J* = 6.6, 2.2 Hz, 1H), 4.21 (d, *J* = 2.3 Hz, 1H), 3.73 (s, 3H), 2.32 (s, 3H) ppm. <sup>13</sup>C NMR (126 MHz, CDCl<sub>3</sub>) δ 167.71, 166.04, 151.64, 142.40, 141.09, 137.91, 137.48, 134.68, 132.04, 131.74, 130.41, 128.68, 127.83, 127.67, 126.79, 126.18, 126.14, 125.09, 124.96, 119.77, 115.58, 111.50, 109.62, 109.25, 71.93, 51.51, 47.72, 20.73 ppm. HRMS (ESI) *m/z*: [M+H]<sup>+</sup> Calcd for C<sub>32</sub>H<sub>29</sub>N<sub>2</sub>O<sub>4</sub> 505.2122; Found 505.2127;

**Methyl (*E*)-3-(2-(4-chlorobenzamido)phenyl)-2-((phenylamino)methyl)acrylate (**6l**):**

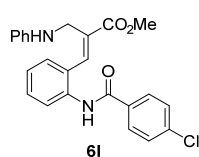

Purified by flash chromatography (petroleum ether/ethyl acetate = 5/1) and obtained as yellow solid, 40.0 mg, 95% yield, melting point 155.4-156.6 °C. <sup>1</sup>H NMR (400 MHz, CDCl<sub>3</sub>) δ 8.08 (d, *J* = 8.2 Hz, 1H), 7.90 (s, 1H), 7.79 (s, 1H), 7.68 – 7.59 (m, 2H), 7.56 – 7.44 (m, 2H), 7.44 – 7.36 (m, 2H), 7.26 – 7.24 (m, 1H), 7.19 – 7.02 (m, 2H), 6.73 – 6.64 (m, 1H), 6.47 – 6.33 (m, 2H), 4.18 (s, 1H), 4.06 (s, 2H), 3.84 (s, 3H) ppm. <sup>13</sup>C NMR (101 MHz, CDCl<sub>3</sub>) δ 167.59, 166.19, 146.52, 138.83, 135.91, 134.73, 132.68, 132.39, 132.30, 130.38, 129.46, 129.17, 127.76, 127.58, 125.59, 124.31, 115.87, 110.64, 52.84, 41.57 ppm. HRMS (ESI) *m/z*: [M+H]<sup>+</sup> Calcd for C<sub>24</sub>H<sub>22</sub>ClN<sub>2</sub>O<sub>3</sub> 421.1313; Found 421.1315.

---

## X-ray crystallographic data for 3aa, 5aa and 6l

### Crystal Structure and data for compound 3aa

Table 1 Crystal data and structure refinement for cxy5064\_0m\_4.

|                                             |                                                                |
|---------------------------------------------|----------------------------------------------------------------|
| Identification code                         | cxy5064_0m_4                                                   |
| Empirical formula                           | C <sub>26</sub> H <sub>21</sub> NO <sub>4</sub>                |
| Formula weight                              | 411.44                                                         |
| Temperature/K                               | 100.0(2)                                                       |
| Crystal system                              | monoclinic                                                     |
| Space group                                 | P2 <sub>1</sub>                                                |
| a/Å                                         | 6.9055(4)                                                      |
| b/Å                                         | 21.4299(11)                                                    |
| c/Å                                         | 27.6189(15)                                                    |
| α/°                                         | 90                                                             |
| β/°                                         | 92.031(2)                                                      |
| γ/°                                         | 90                                                             |
| Volume/Å <sup>3</sup>                       | 4084.6(4)                                                      |
| Z                                           | 8                                                              |
| ρ <sub>calc</sub> /cm <sup>3</sup>          | 1.338                                                          |
| μ/mm <sup>-1</sup>                          | 0.466                                                          |
| F(000)                                      | 1728.0                                                         |
| Crystal size/mm <sup>3</sup>                | 0.3 × 0.22 × 0.18                                              |
| Radiation                                   | CuKα (λ = 1.34139)                                             |
| 2θ range for data collection/°              | 8.418 to 144.37                                                |
| Index ranges                                | ? ≤ h ≤ ?, ? ≤ k ≤ ?, ? ≤ l ≤ ?                                |
| Reflections collected                       | 15953                                                          |
| Independent reflections                     | 15953 [R <sub>int</sub> = 0.0498, R <sub>sigma</sub> = 0.0640] |
| Data/restraints/parameters                  | 5978/22/442                                                    |
| Goodness-of-fit on F <sup>2</sup>           | 1.043                                                          |
| Final R indexes [I ≥ 2σ (I)]                | R1 = 0.0753, wR2 = 0.2086                                      |
| Final R indexes [all data]                  | R1 = 0.0899, wR2 = 0.2168                                      |
| Largest diff. peak/hole / e Å <sup>-3</sup> | 0.47/-0.35                                                     |
| Flack parameter                             | 0.01 (13)                                                      |

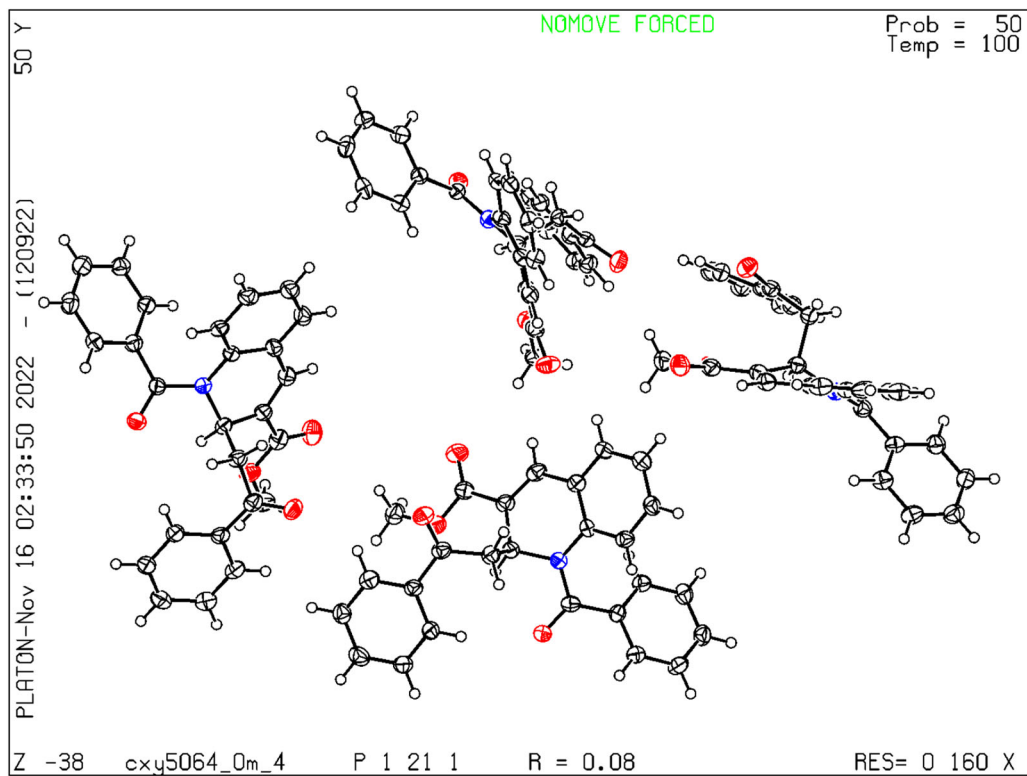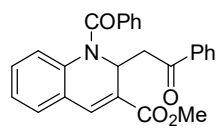

**3aa**

---

Crystal Structure and data for compound **5aa**

Table 2 Crystal data and structure refinement for cxy5150\_0m.

|                                             |                                                               |
|---------------------------------------------|---------------------------------------------------------------|
| Identification code                         | cxy5150_0m                                                    |
| Empirical formula                           | C <sub>34</sub> H <sub>30</sub> N <sub>2</sub> O <sub>3</sub> |
| Formula weight                              | 514.60                                                        |
| Temperature/K                               | 100.0(2)                                                      |
| Crystal system                              | monoclinic                                                    |
| Space group                                 | P2 <sub>1</sub> /c                                            |
| a/Å                                         | 11.8470(7)                                                    |
| b/Å                                         | 18.1061(10)                                                   |
| c/Å                                         | 13.0266(7)                                                    |
| α/°                                         | 90                                                            |
| β/°                                         | 95.964(2)                                                     |
| γ/°                                         | 90                                                            |
| Volume/Å <sup>3</sup>                       | 2779.1(3)                                                     |
| Z                                           | 4                                                             |
| ρ <sub>calc</sub> /cm <sup>3</sup>          | 1.230                                                         |
| μ/mm <sup>-1</sup>                          | 0.397                                                         |
| F(000)                                      | 1088.0                                                        |
| Crystal size/mm <sup>3</sup>                | 0.31 × 0.26 × 0.18                                            |
| Radiation                                   | GaKα (λ = 1.34138)                                            |
| 2θ range for data collection/°              | 7.3 to 113.948                                                |
| Index ranges                                | -14 ≤ h ≤ 14, -21 ≤ k ≤ 22, -16 ≤ l ≤ 16                      |
| Reflections collected                       | 33411                                                         |
| Independent reflections                     | 5641 [R <sub>int</sub> = 0.0573, R <sub>sigma</sub> = 0.0378] |
| Data/restraints/parameters                  | 5641/0/355                                                    |
| Goodness-of-fit on F <sup>2</sup>           | 1.040                                                         |
| Final R indexes [I ≥ 2σ (I)]                | R <sub>1</sub> = 0.0368, wR <sub>2</sub> = 0.0953             |
| Final R indexes [all data]                  | R <sub>1</sub> = 0.0400, wR <sub>2</sub> = 0.0969             |
| Largest diff. peak/hole / e Å <sup>-3</sup> | 0.26/-0.19                                                    |

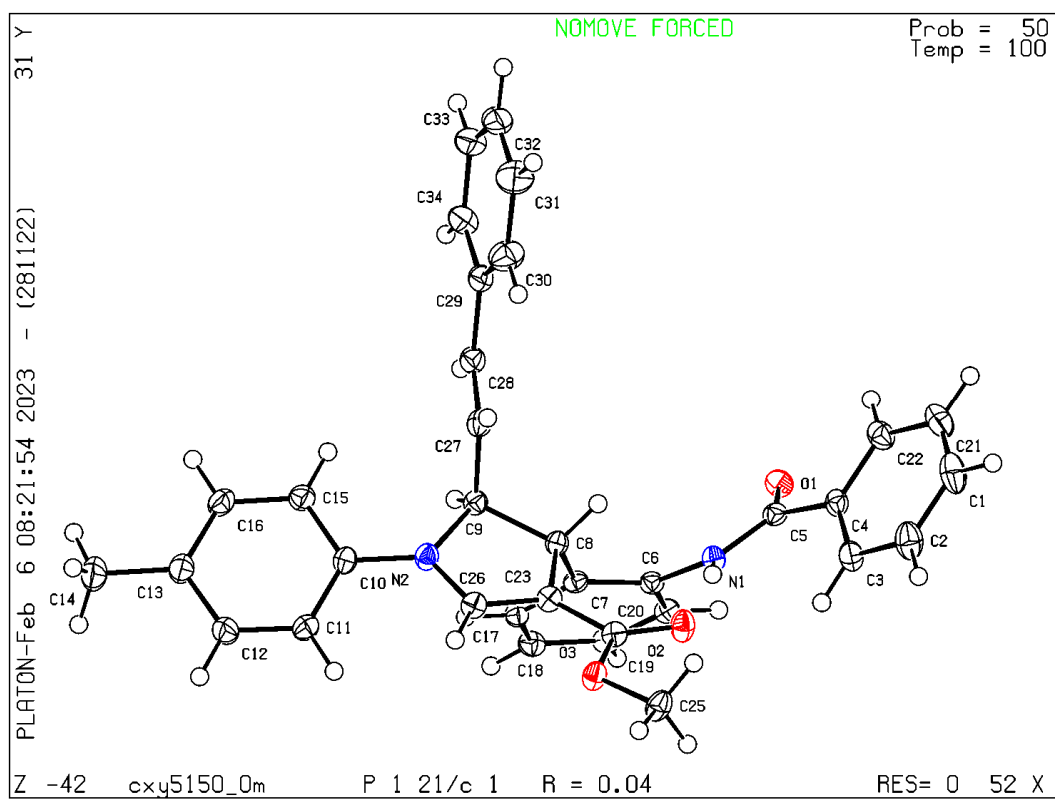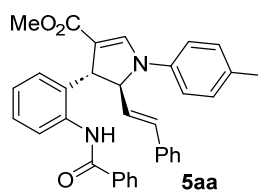



---

Crystal Structure and data for compound **61**

Table 3 Crystal data and structure refinement for cxy3621\_0m.

|                                             |                                                                  |
|---------------------------------------------|------------------------------------------------------------------|
| Identification code                         | cxy3621_0m                                                       |
| Empirical formula                           | C <sub>24</sub> H <sub>21</sub> N <sub>2</sub> O <sub>3</sub> Cl |
| Formula weight                              | 420.88                                                           |
| Temperature/K                               | 100.0(2)                                                         |
| Crystal system                              | triclinic                                                        |
| Space group                                 | P-1                                                              |
| a/Å                                         | 9.6896(5)                                                        |
| b/Å                                         | 10.1998(5)                                                       |
| c/Å                                         | 10.8323(6)                                                       |
| α/°                                         | 89.990(2)                                                        |
| β/°                                         | 71.675(2)                                                        |
| γ/°                                         | 84.875(2)                                                        |
| Volume/Å <sup>3</sup>                       | 1011.78(9)                                                       |
| Z                                           | 2                                                                |
| ρ <sub>calc</sub> /cm <sup>3</sup>          | 1.381                                                            |
| μ/mm <sup>-1</sup>                          | 1.911                                                            |
| F(000)                                      | 440.0                                                            |
| Crystal size/mm <sup>3</sup>                | 0.28 × 0.22 × 0.15                                               |
| Radiation                                   | CuKα (λ = 1.54178)                                               |
| 2θ range for data collection/°              | 8.602 to 144.272                                                 |
| Index ranges                                | -11 ≤ h ≤ 11, -12 ≤ k ≤ 12, -13 ≤ l ≤ 13                         |
| Reflections collected                       | 22984                                                            |
| Independent reflections                     | 3990 [R <sub>int</sub> = 0.0272, R <sub>sigma</sub> = 0.0177]    |
| Data/restraints/parameters                  | 3990/1/275                                                       |
| Goodness-of-fit on F <sup>2</sup>           | 1.042                                                            |
| Final R indexes [I ≥ 2σ (I)]                | R <sub>1</sub> = 0.0291, wR <sub>2</sub> = 0.0740                |
| Final R indexes [all data]                  | R <sub>1</sub> = 0.0295, wR <sub>2</sub> = 0.0743                |
| Largest diff. peak/hole / e Å <sup>-3</sup> | 0.28/-0.26                                                       |

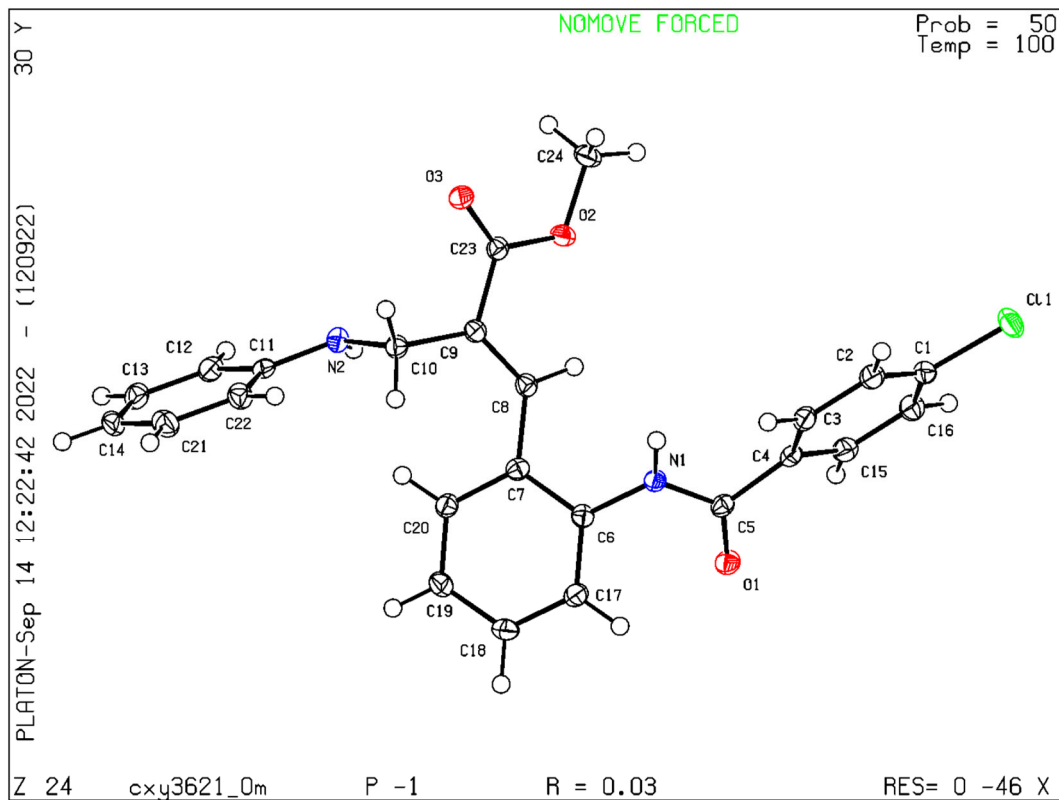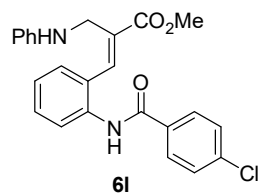

---

## Reference

1. Cai, W.; Zhou, Y.; He, Y.; Chen, K.; Yu, C.; Huang, Y. Designing and Accurately Developing a [6+2] Dipolar Cycloaddition for the Synthesis of Benzodiazocines. *Org. Lett.* **2021**, *23*, 5430–5434.
2. Wang, T.; Chen, X.; Li, P. One-pot Divergent Synthesis of Benzoxazines and Dihydroquinolines from Morita-Baylis-Hillman Alcohols. *Eur. J. Org. Chem.* **2022**. e202200767(5 of 5).
3. Li, Q.; Jia, Z.; Chen, L.; Zhnag, X.; Leng, H.; Zeng, R.; Liu, Y.; Zou, W.; Li, J. Construction of a Benzo[b]azepine Skeleton through Decarboxylative Ylide [6+1] Annulations with Modified Vinyl Benzoxazinones. *Org. Lett.* **2021**, *23*, 814–818.
4. Yu, W.; Tung, C.; Xu, Z. Synthesis of Benzofurans from Sulfur Ylides and ortho-Hydroxy-Functionalized Alkynes. *Adv. Synth. Catal.* **2022**, 364–374.
5. Yu, S.; Xiong, M.; Xie, X.; Liu, Y. Insertion of Nitriles into Zirconocene 1-aza-1,3-diene Complexes: Chemoselective Synthesis of N-H and N-Substituted Pyrroles. *Angew. Chem. Int. Ed.* **2014**, *53*, 11596-11599.
6. Chu, J. C. K.; Dalton, D. M.; Rovis T. Zn-Catalyzed Enantio- and Diastereoselective Formal [4 + 2] Cycloaddition Involving Two Electron-Deficient Partners: Asymmetric Synthesis of Piperidines from 1-Azadienes and Nitro-Alkenes. *J. Am. Chem. Soc.* **2015**, *137*, 4445-4452.

### NMR spectra of compounds 3

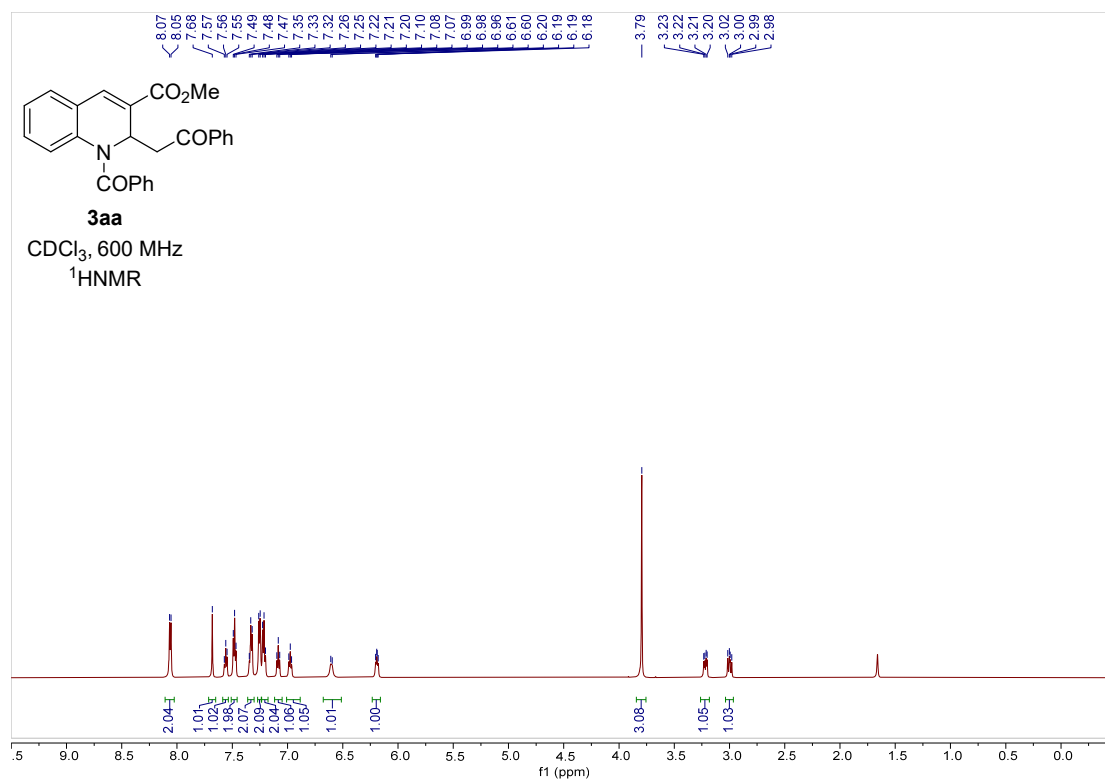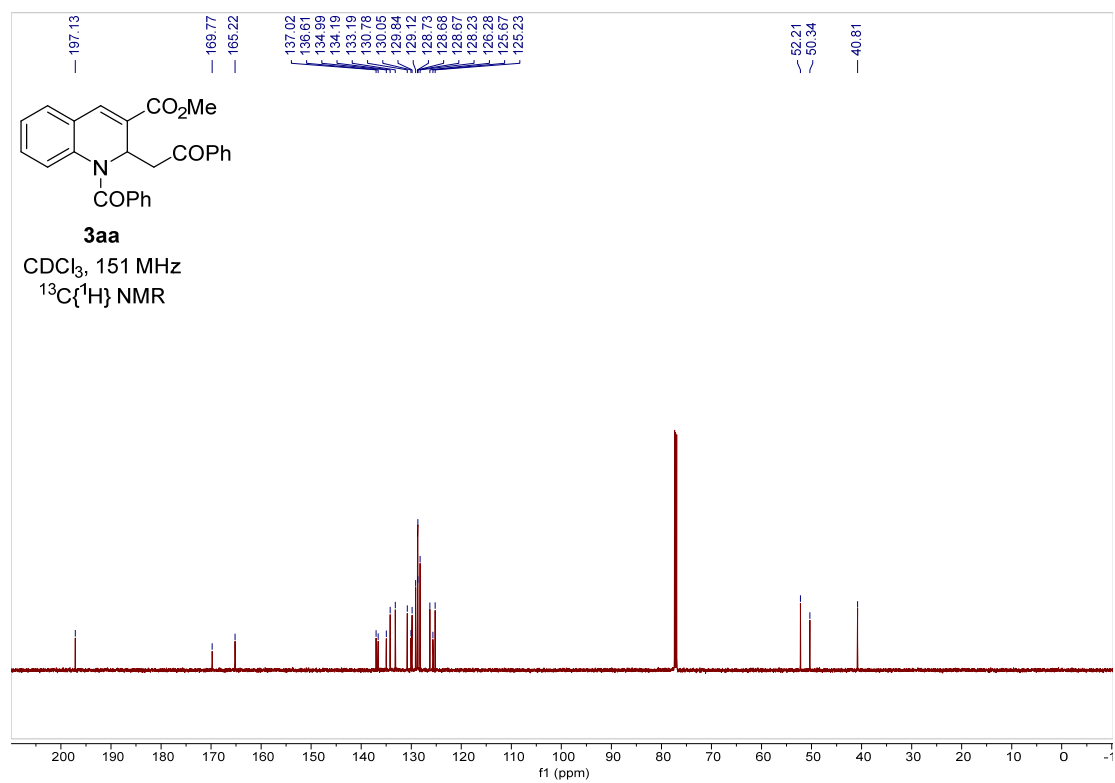

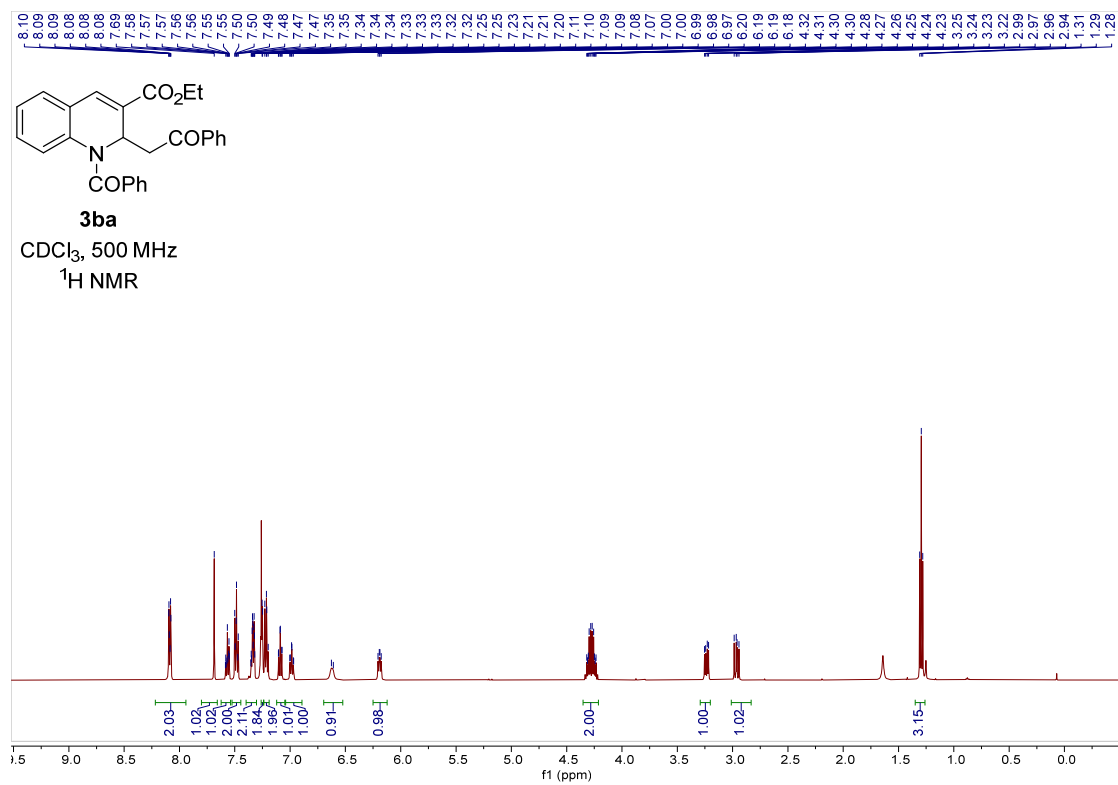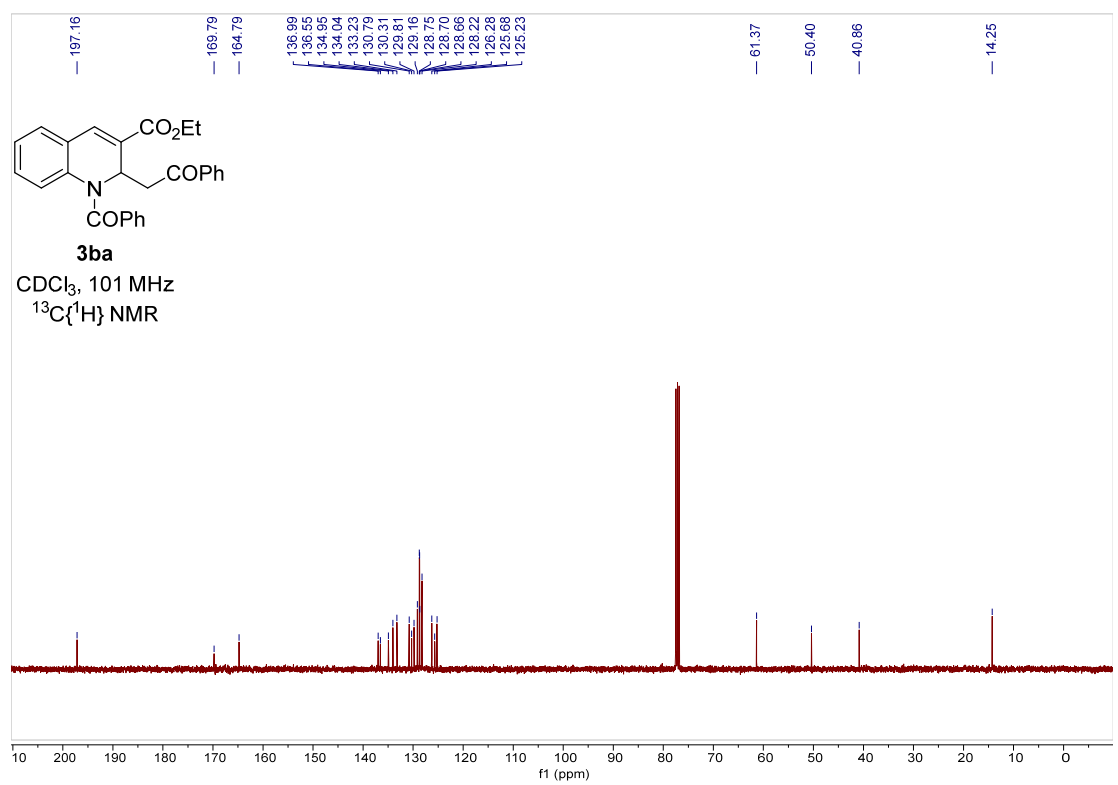

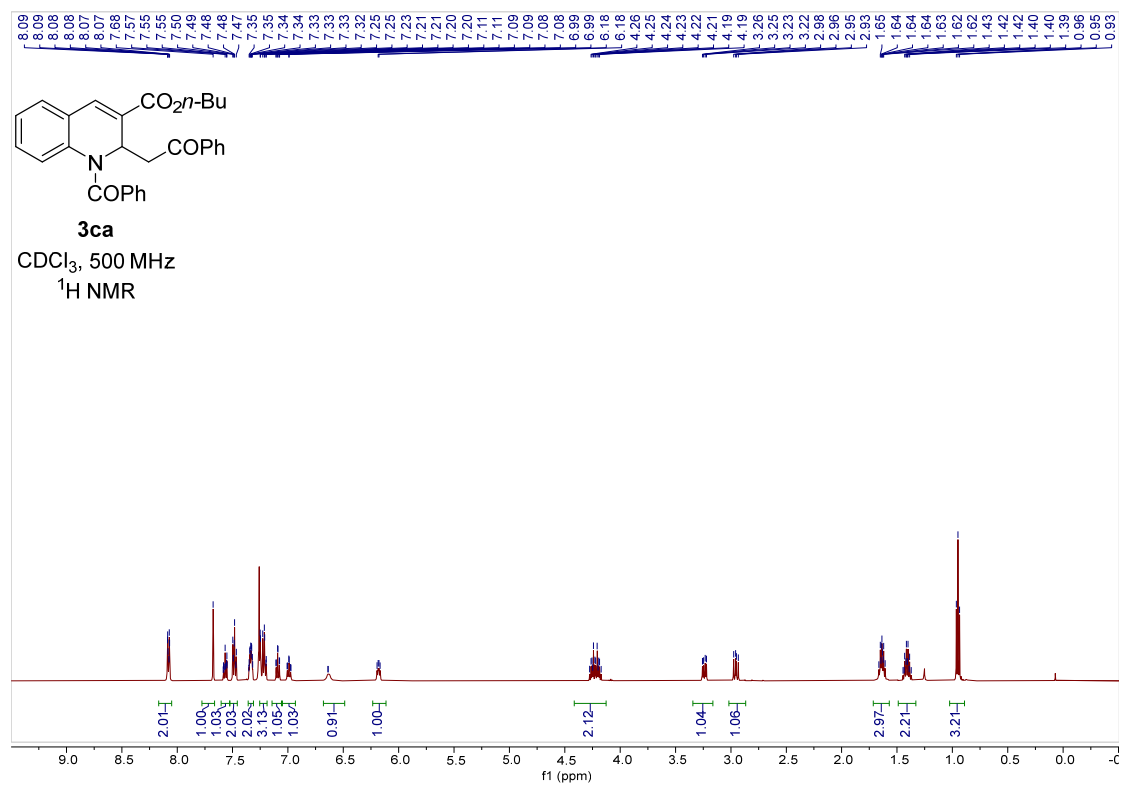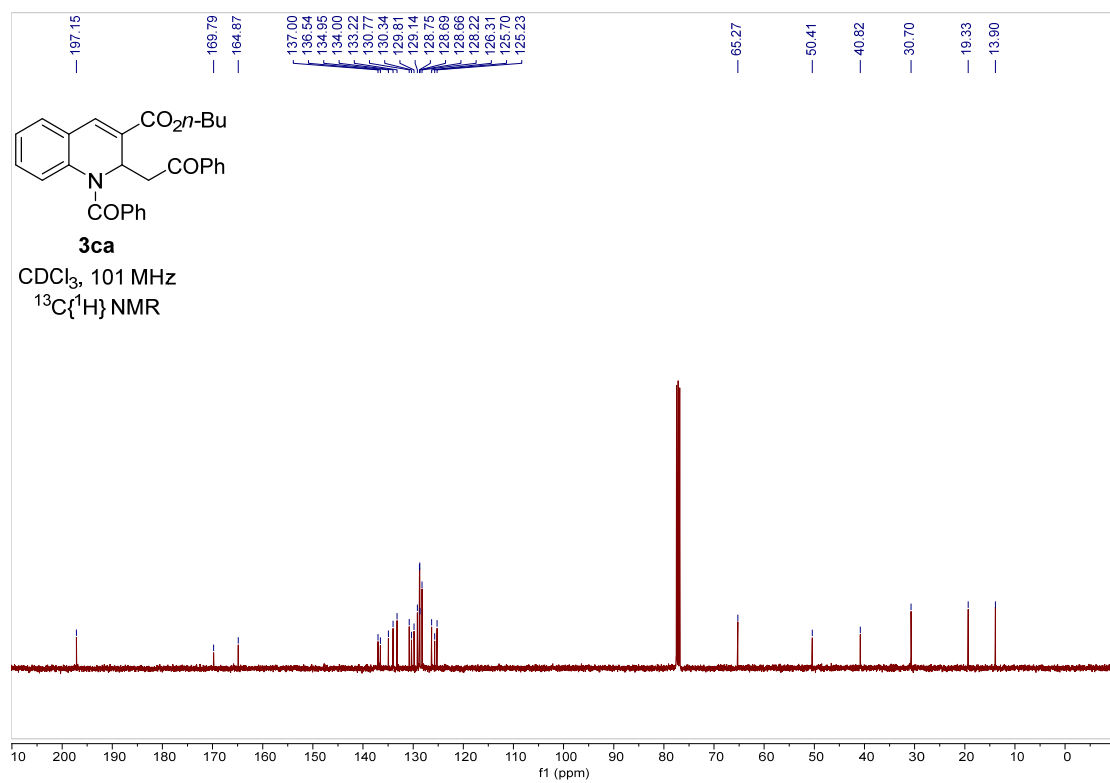



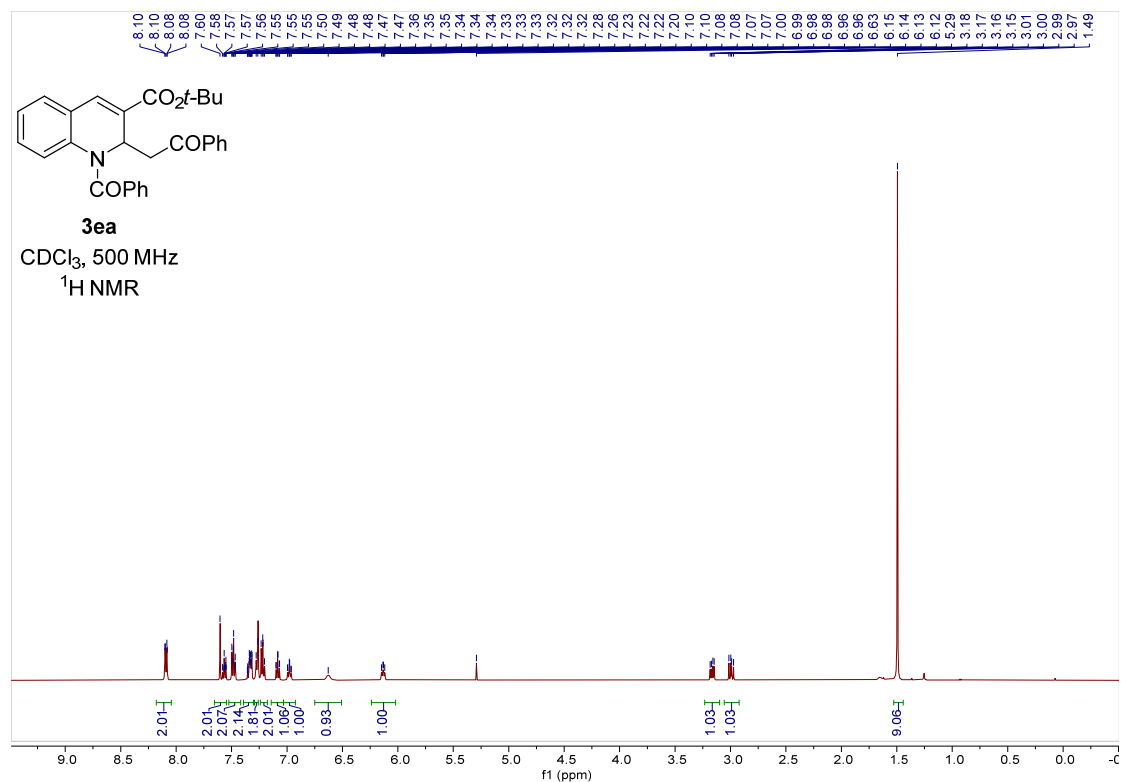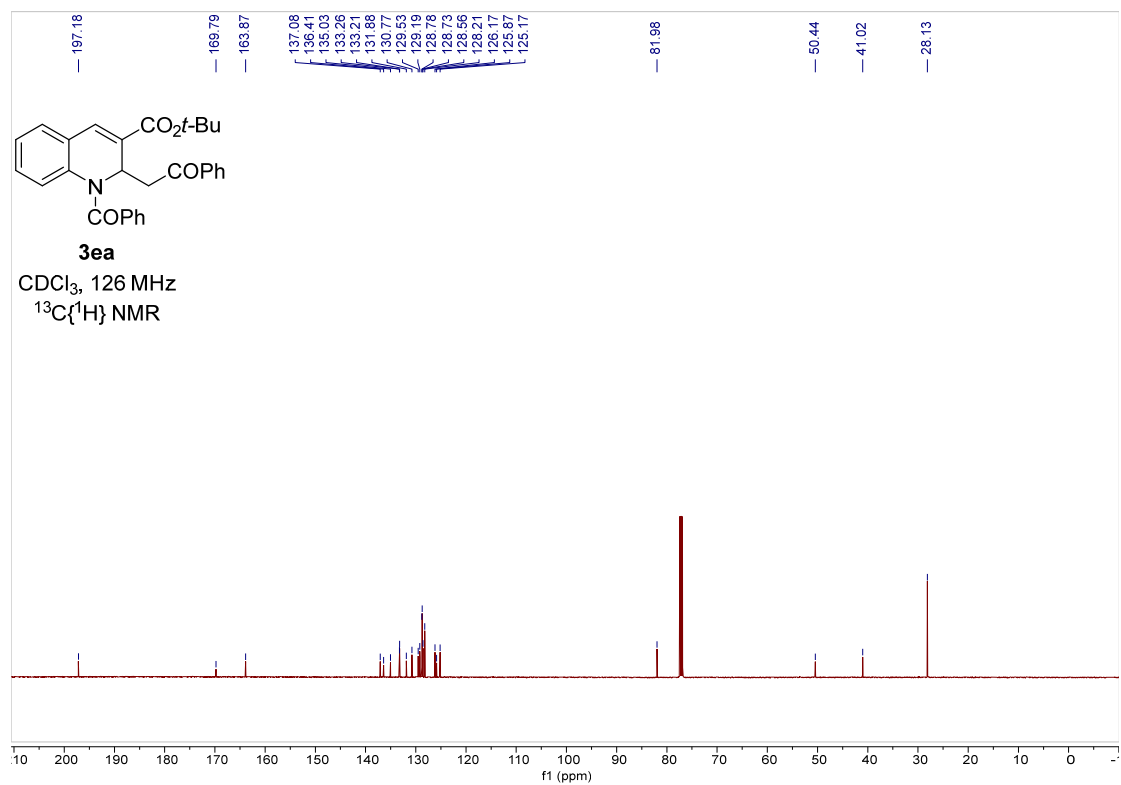



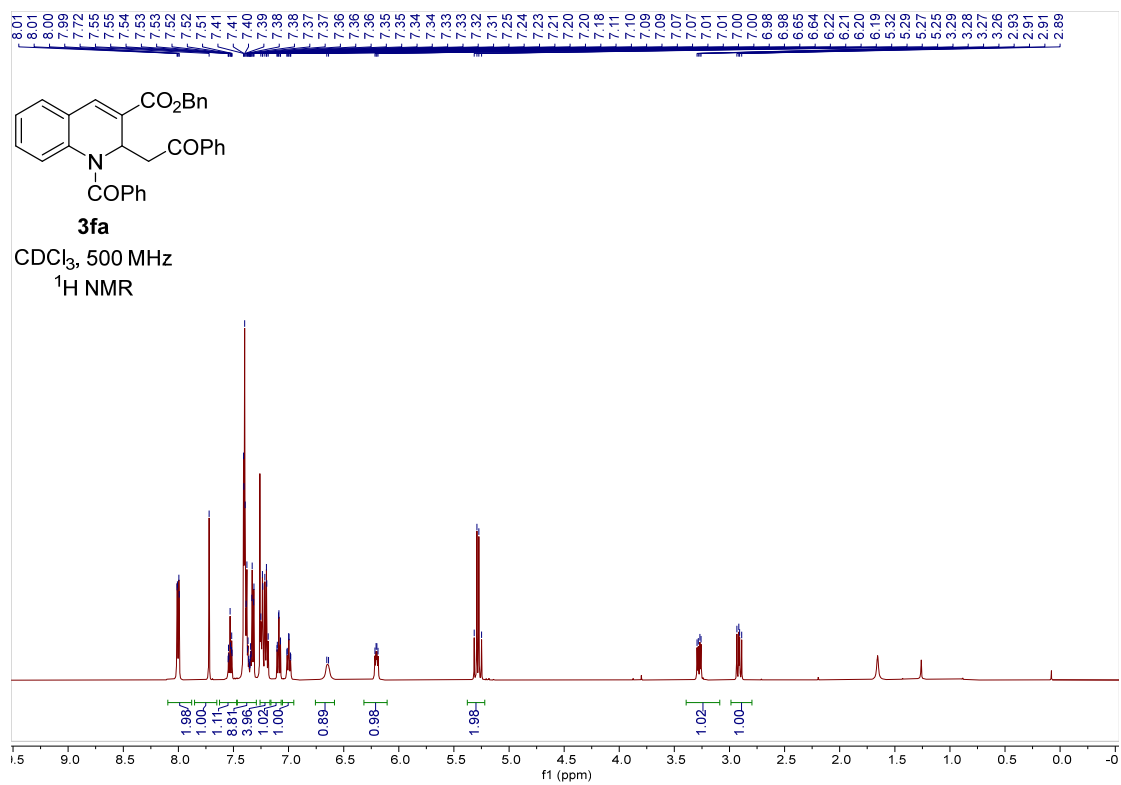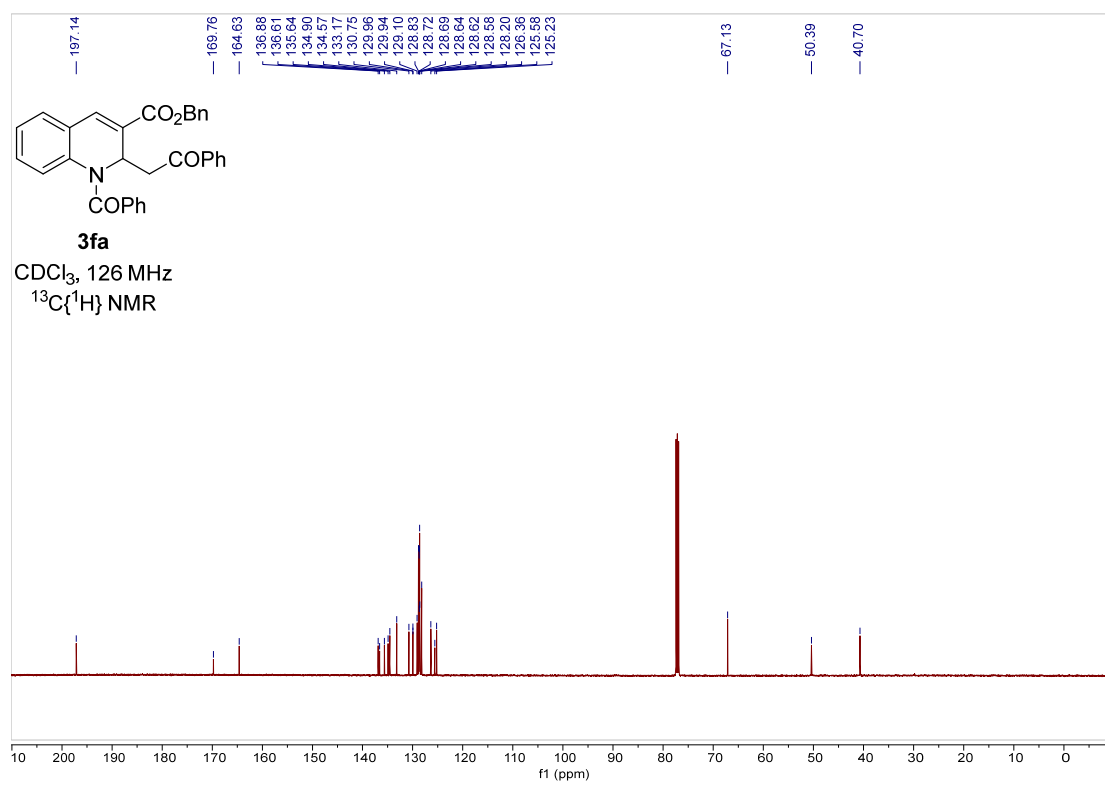

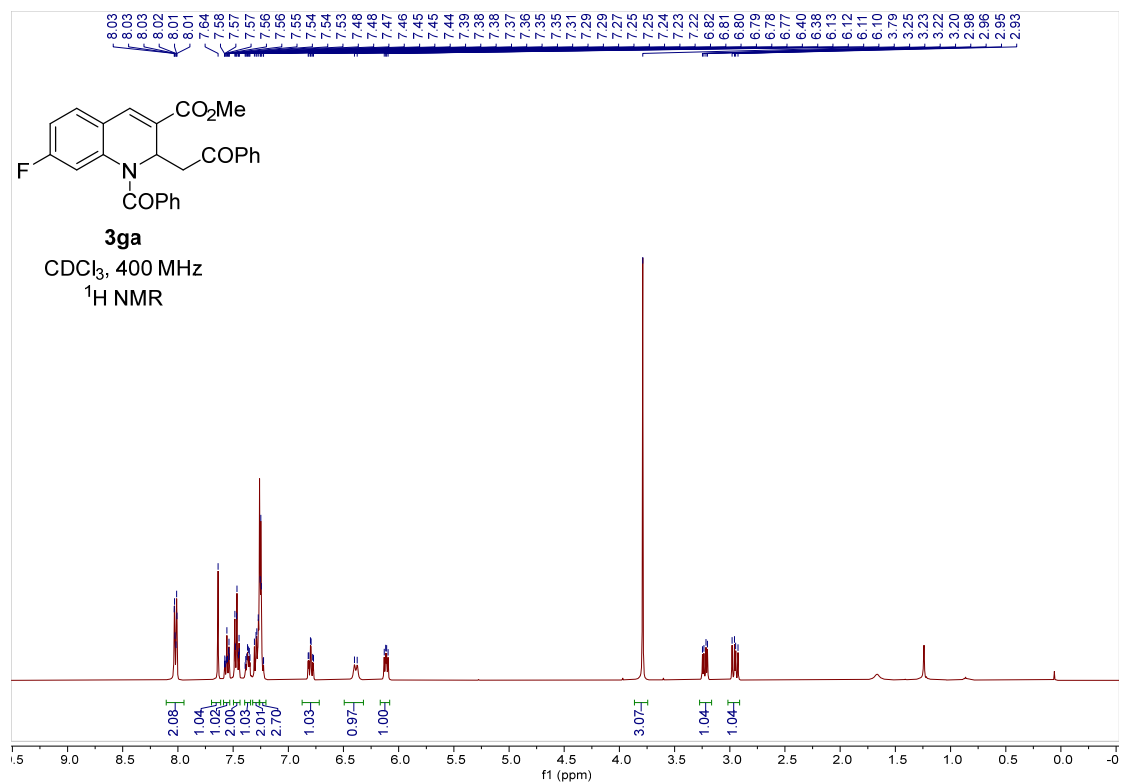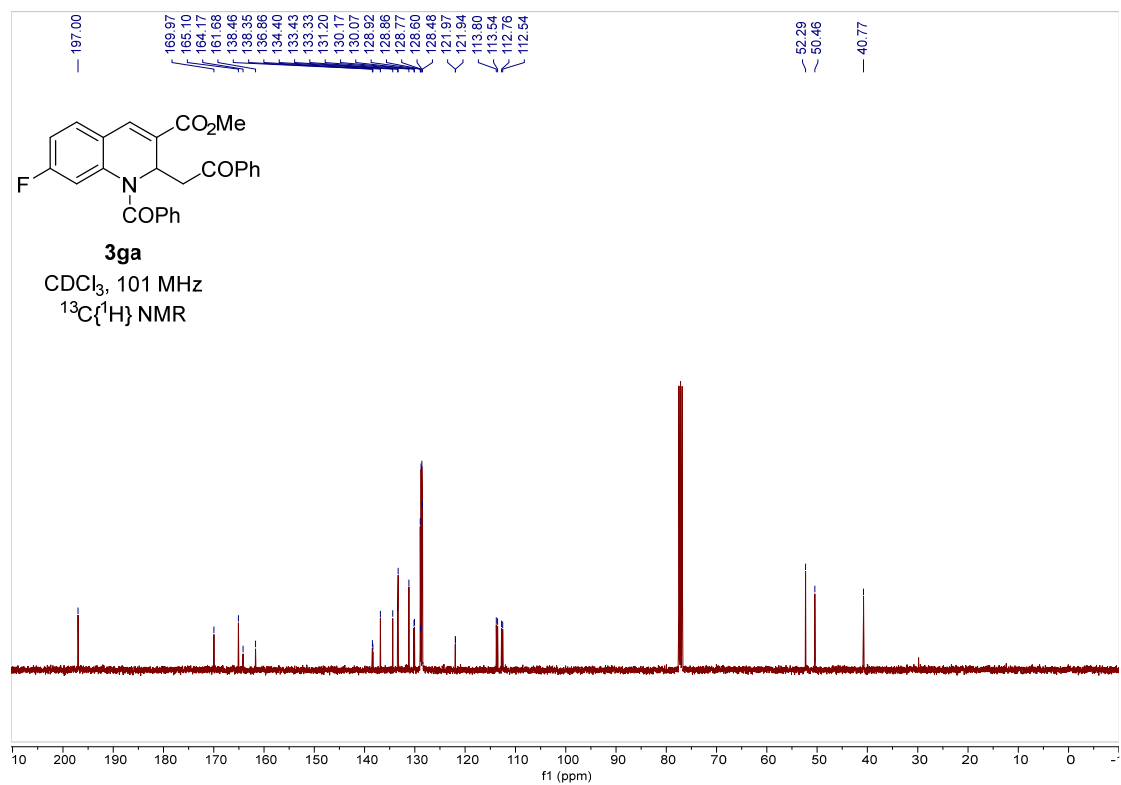

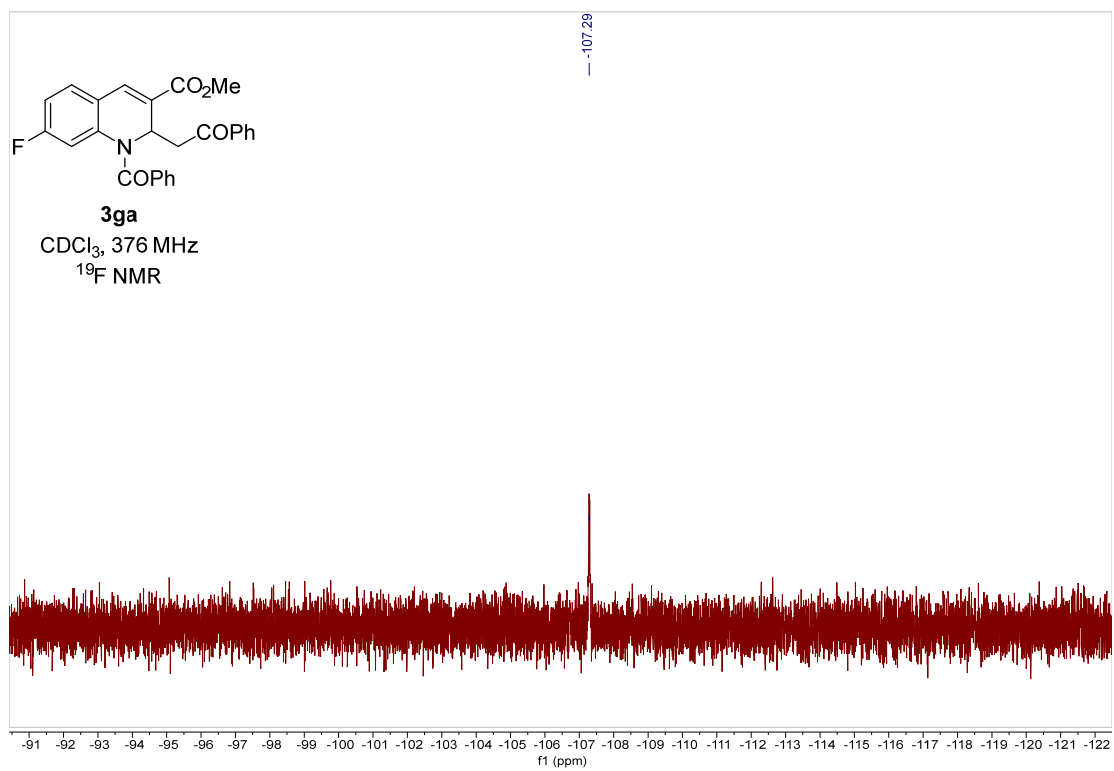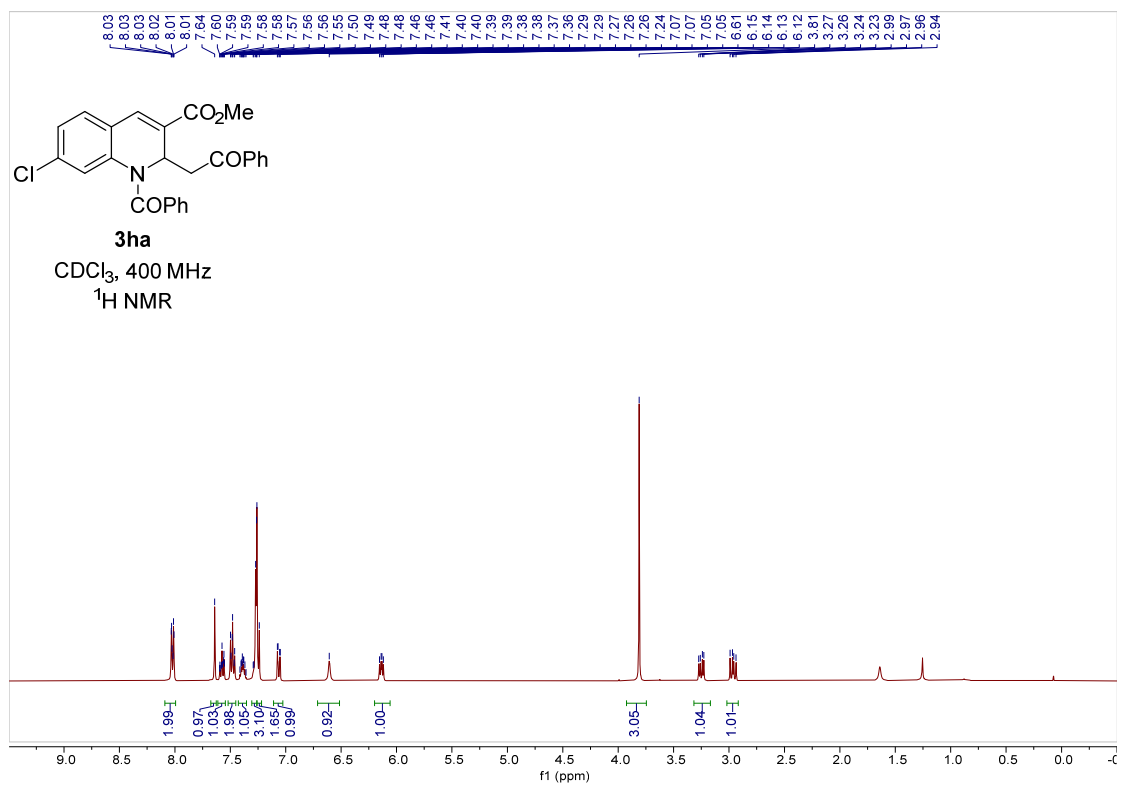

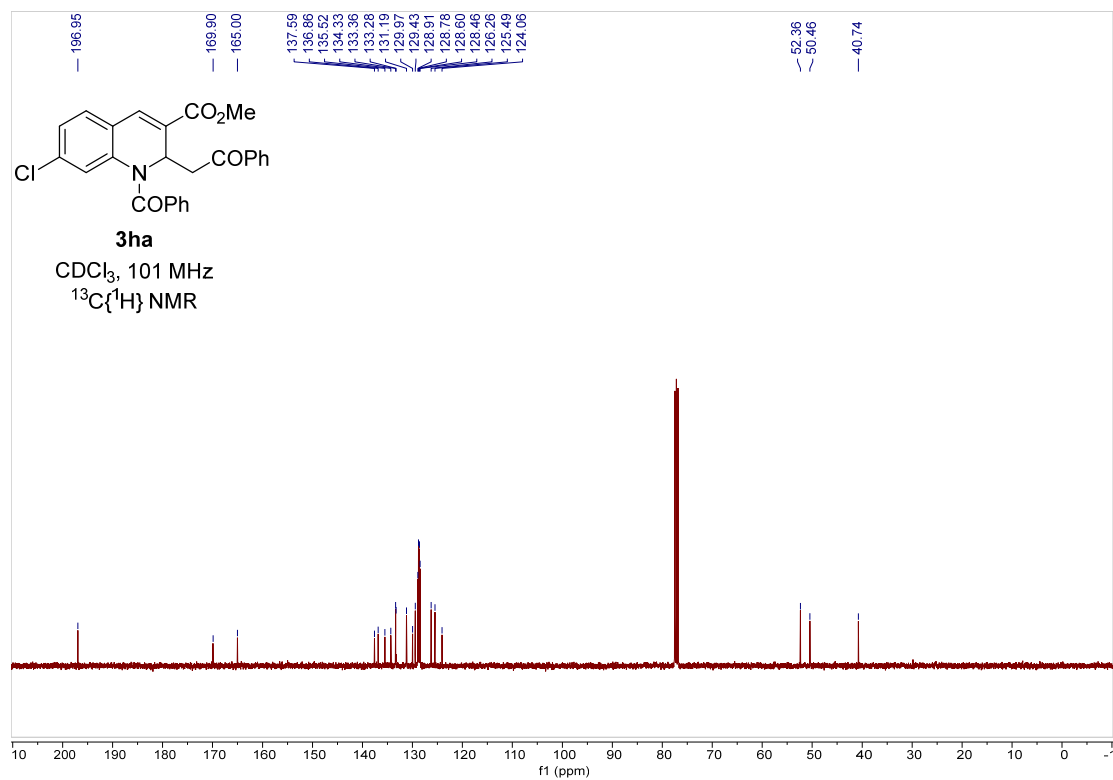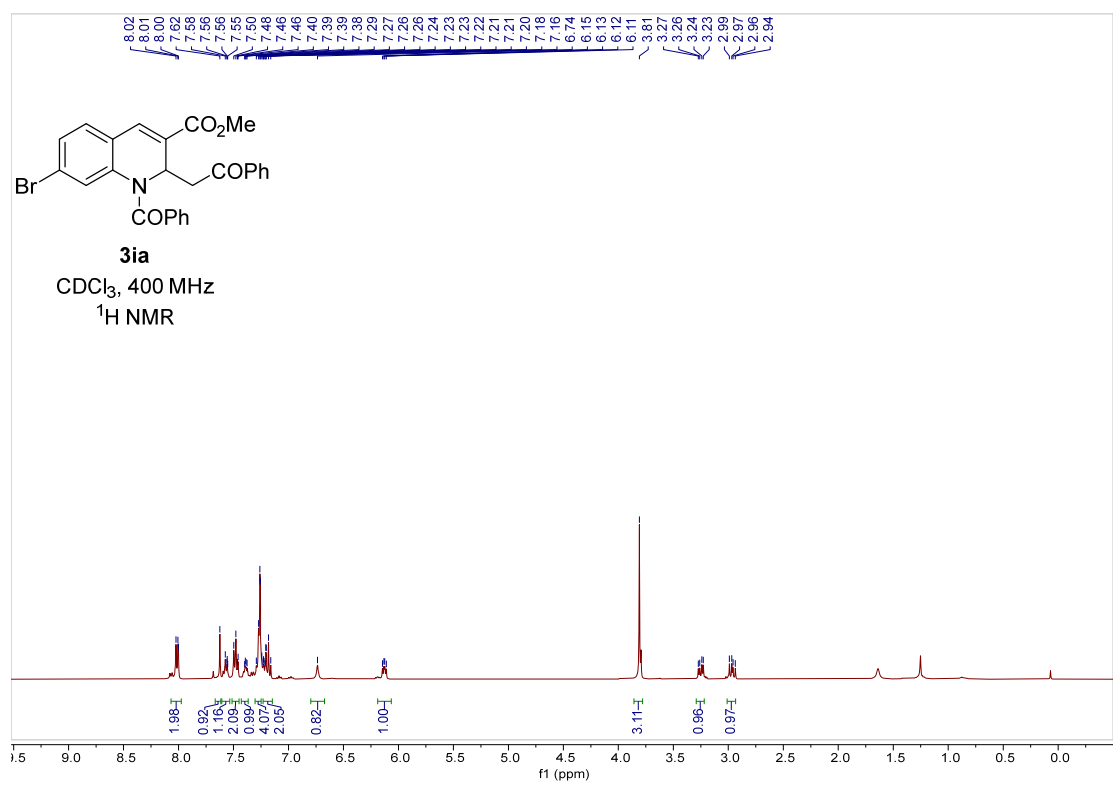

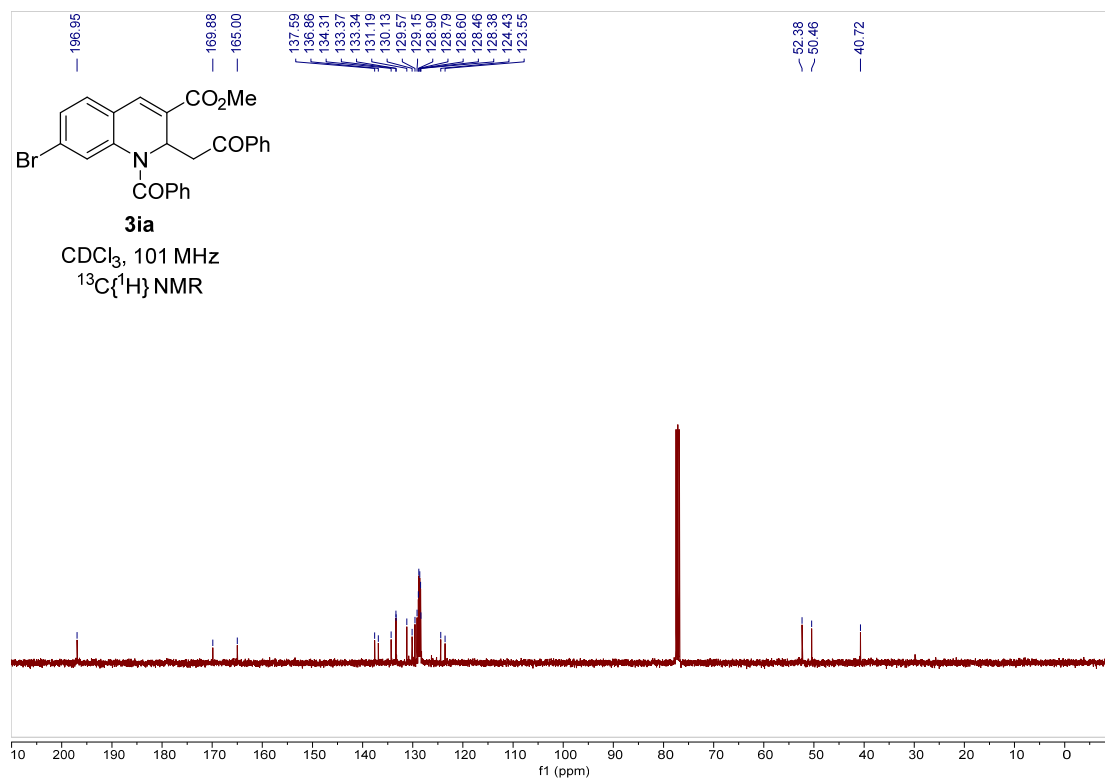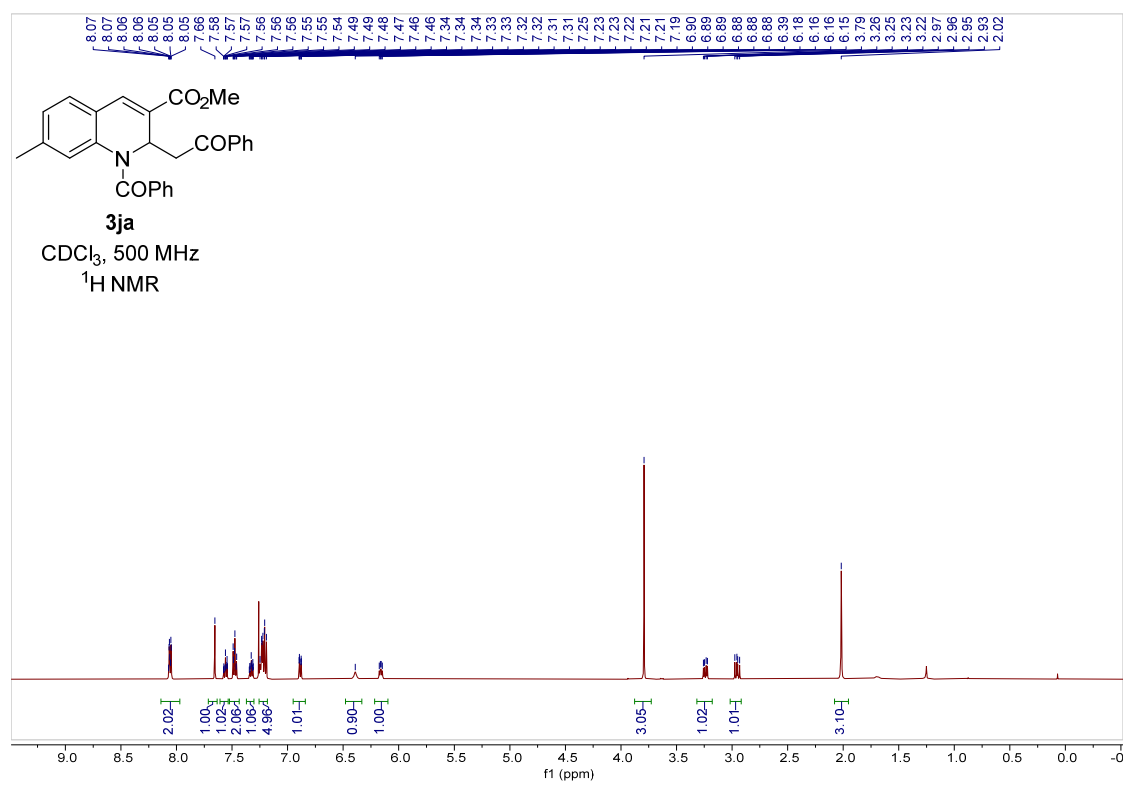

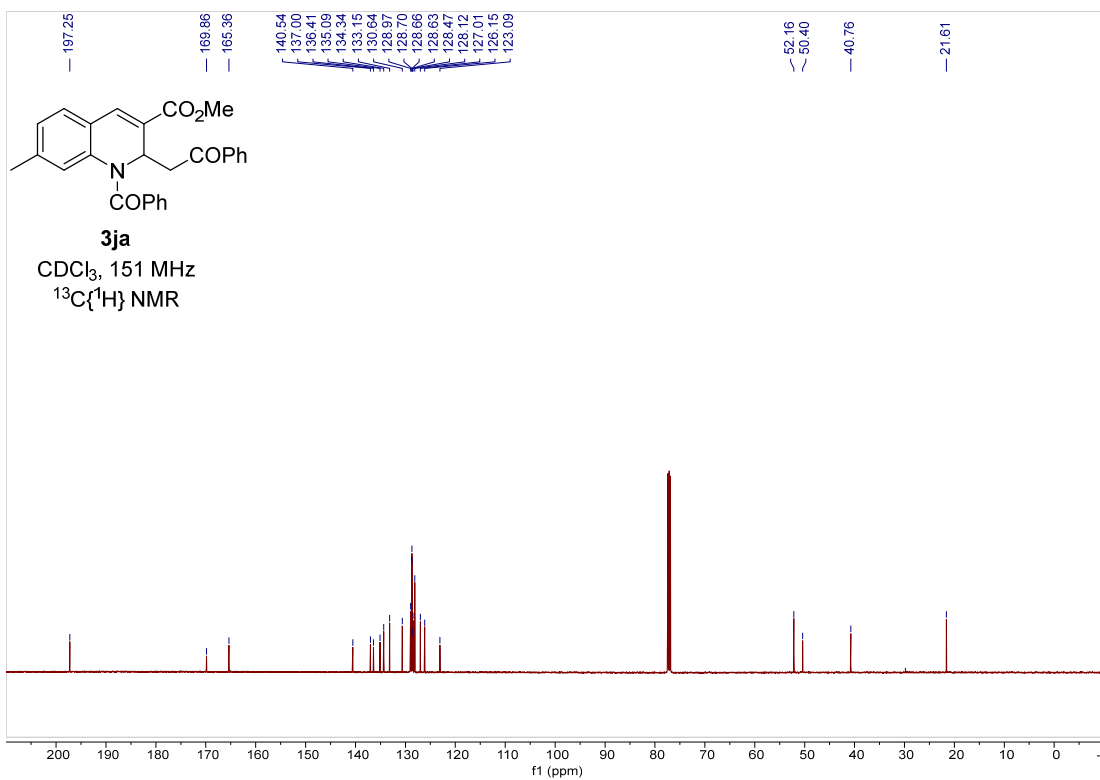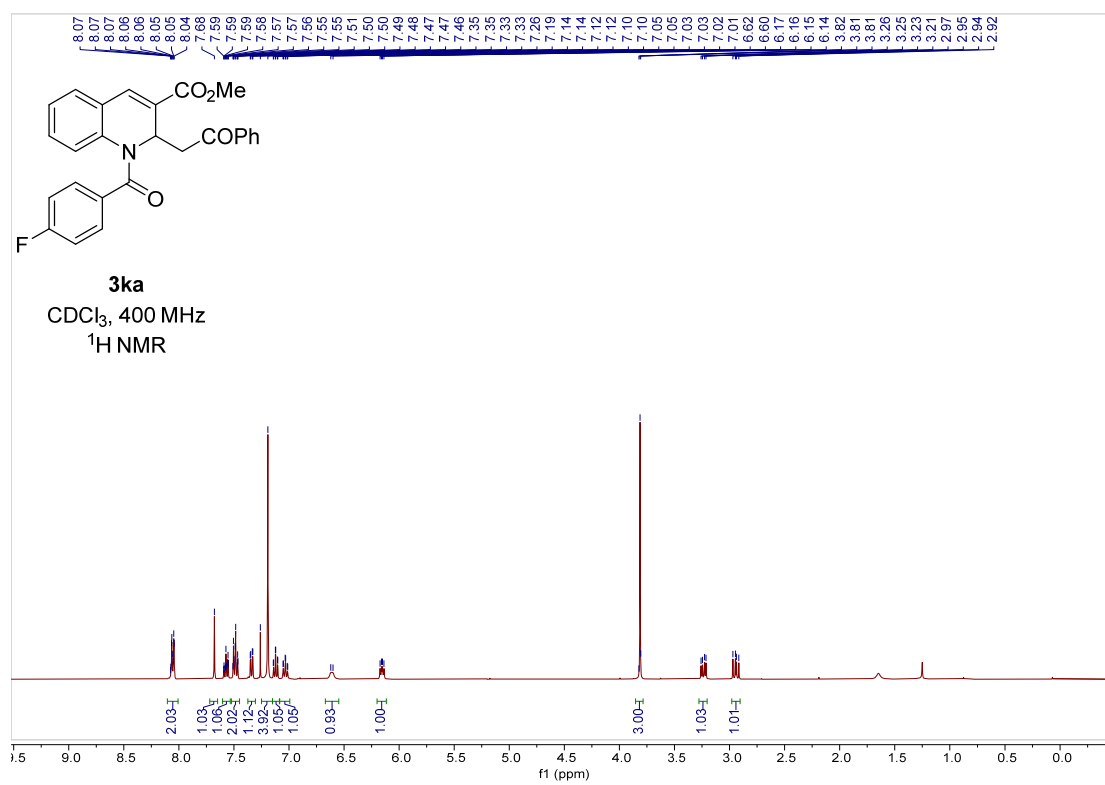

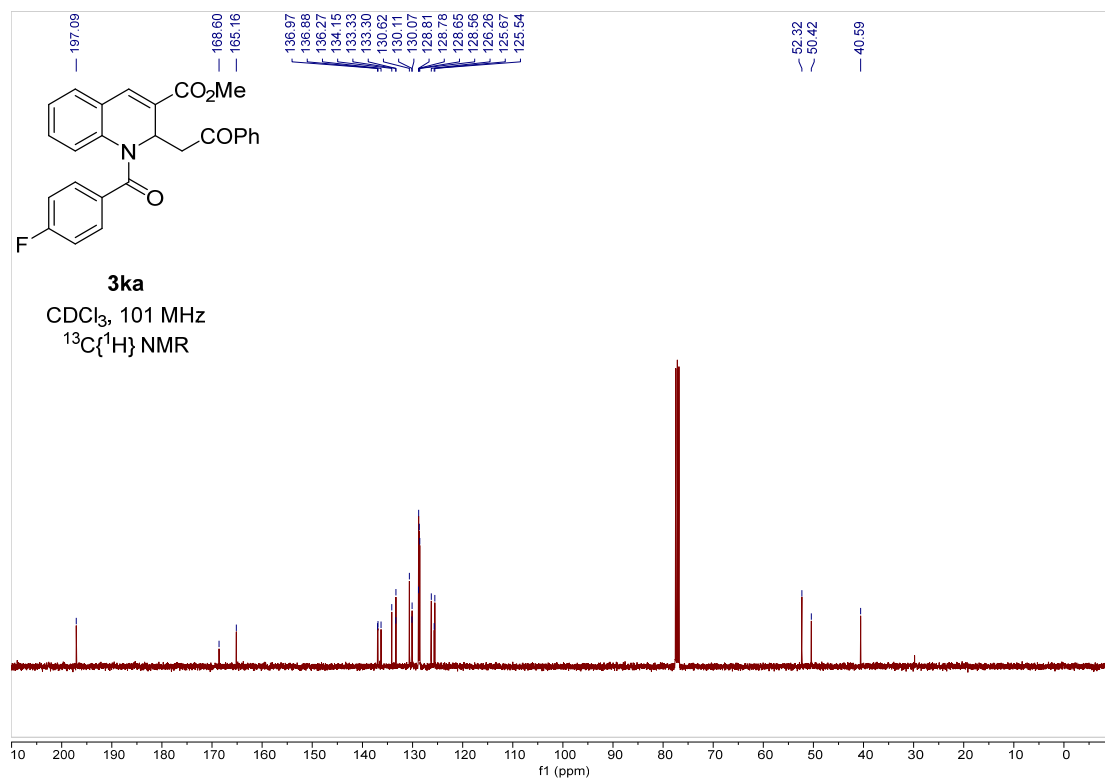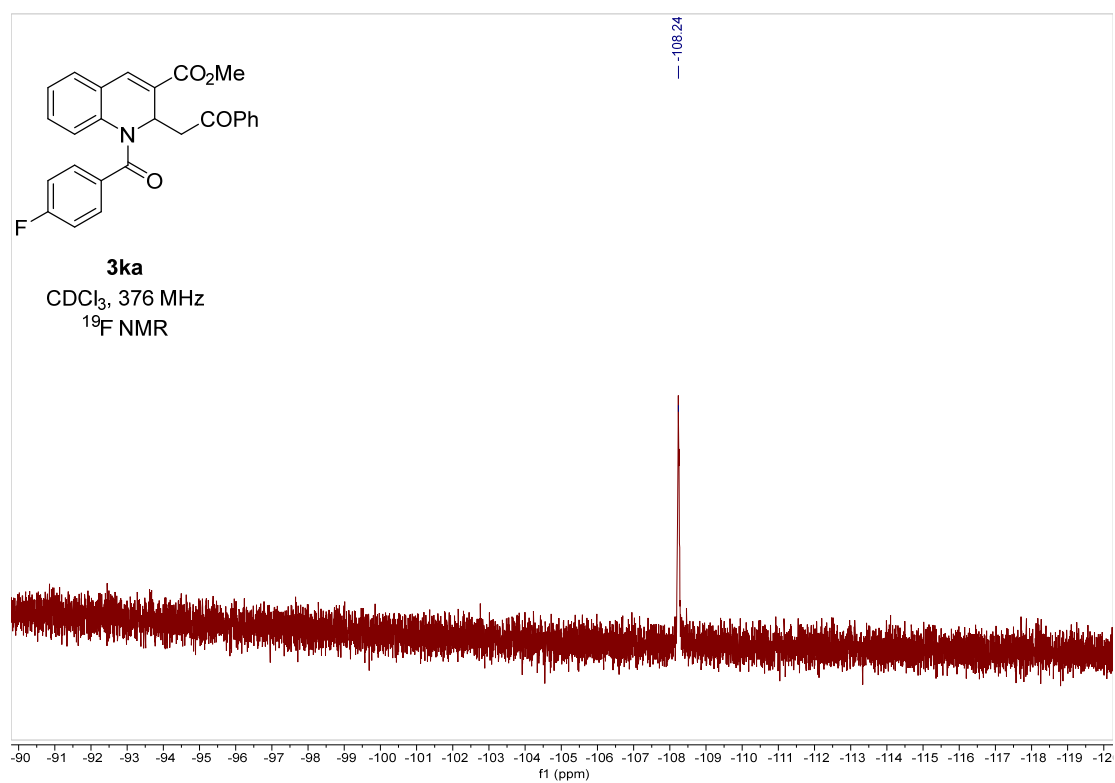





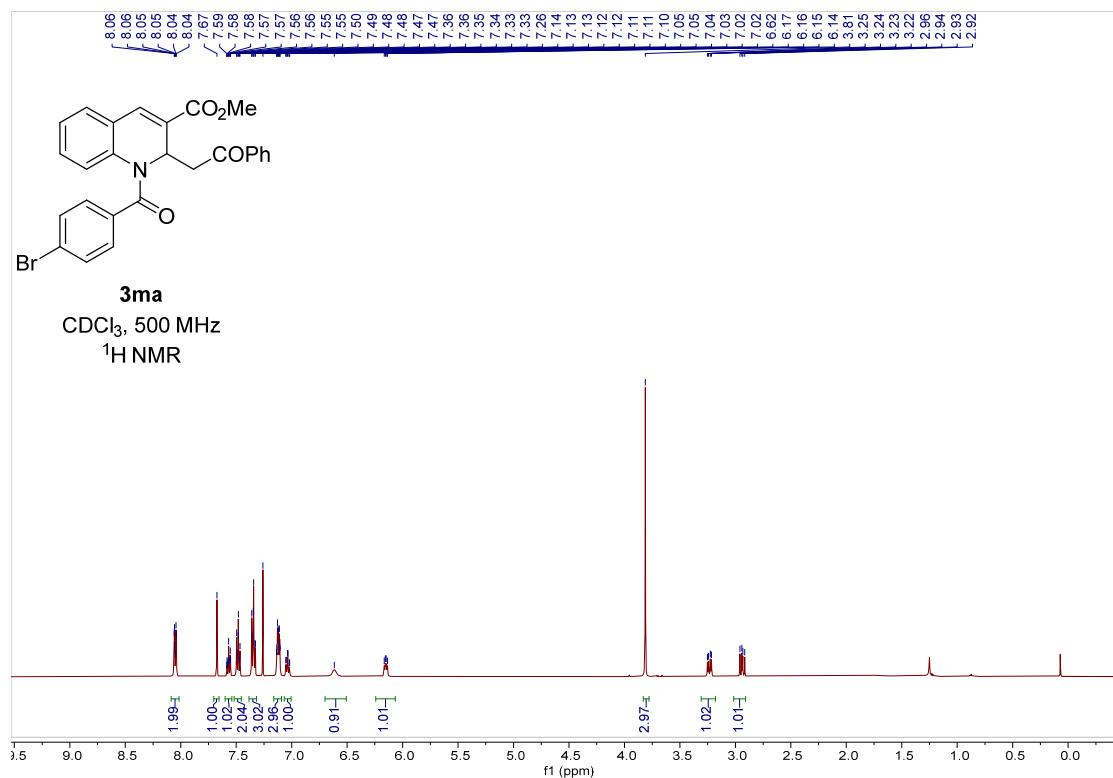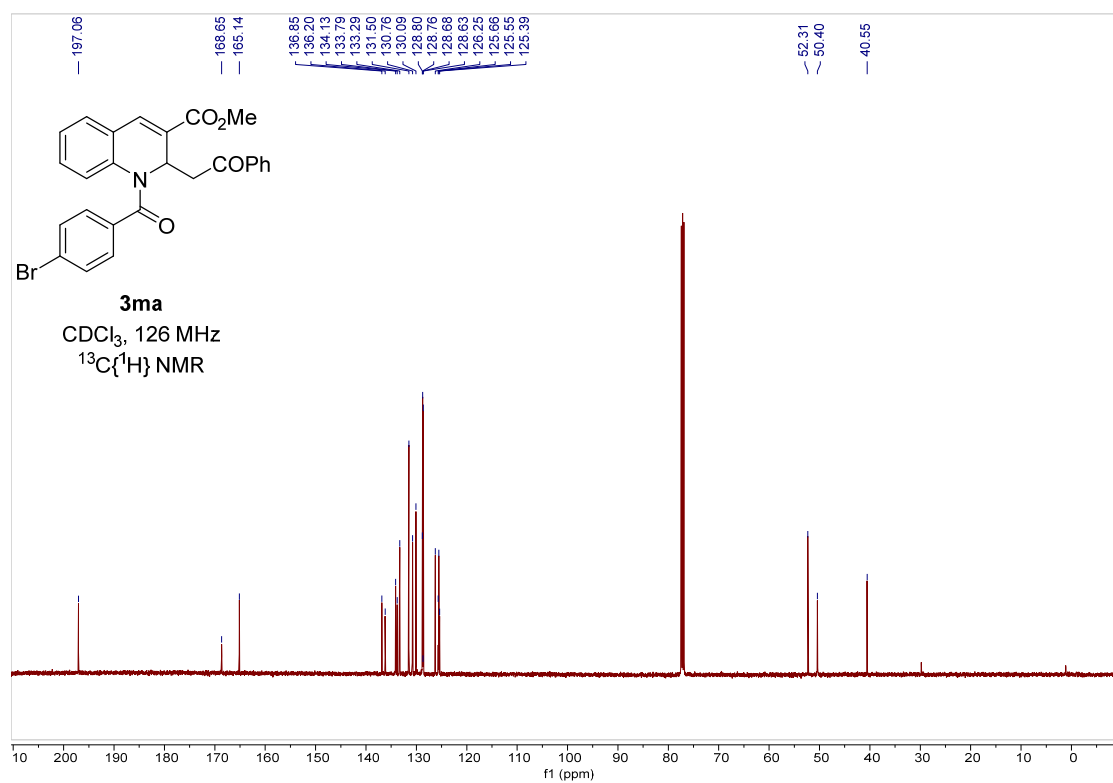

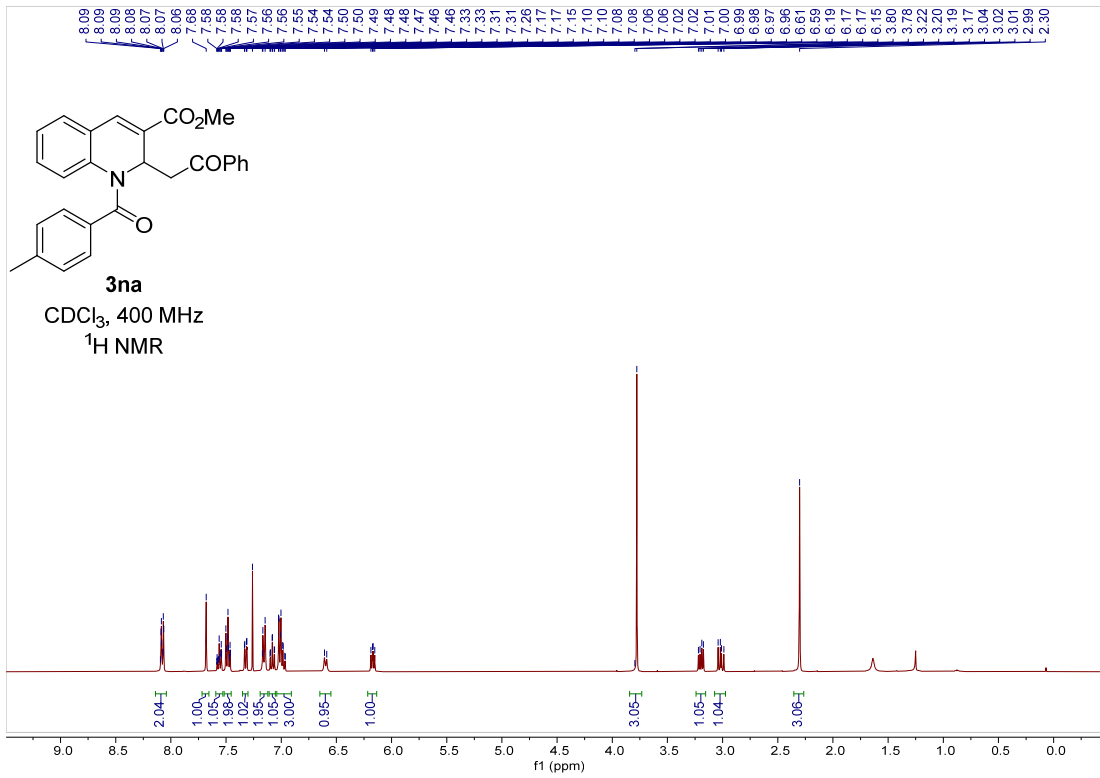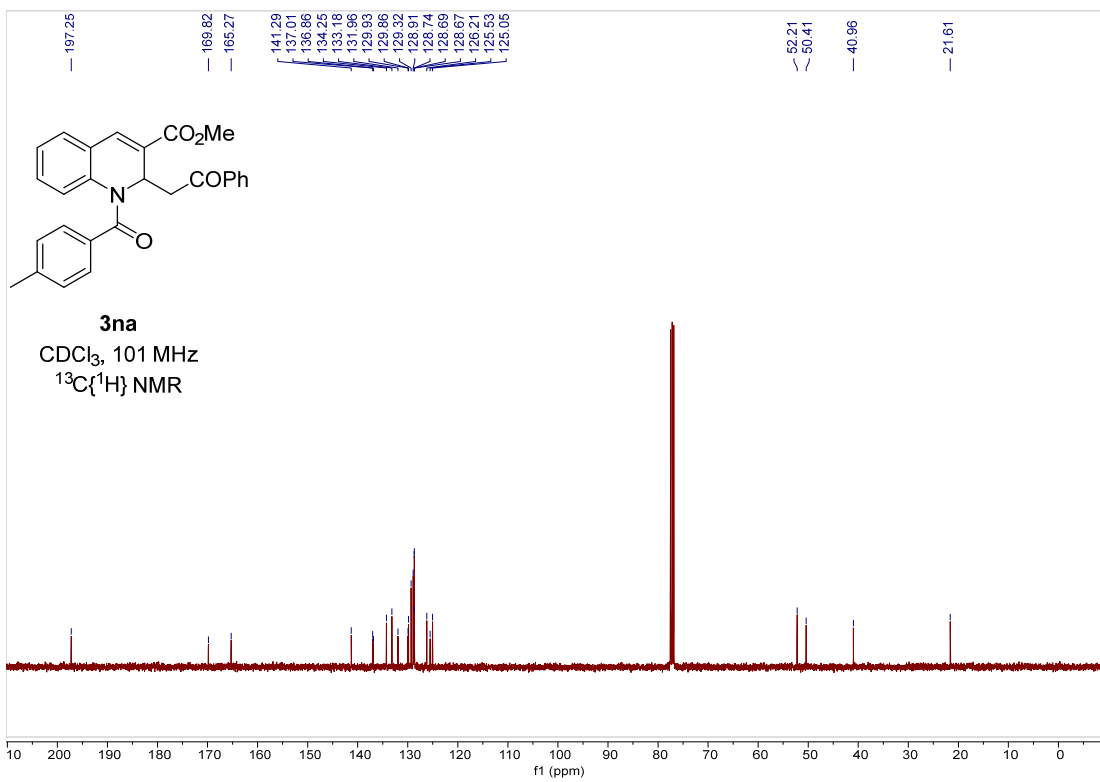

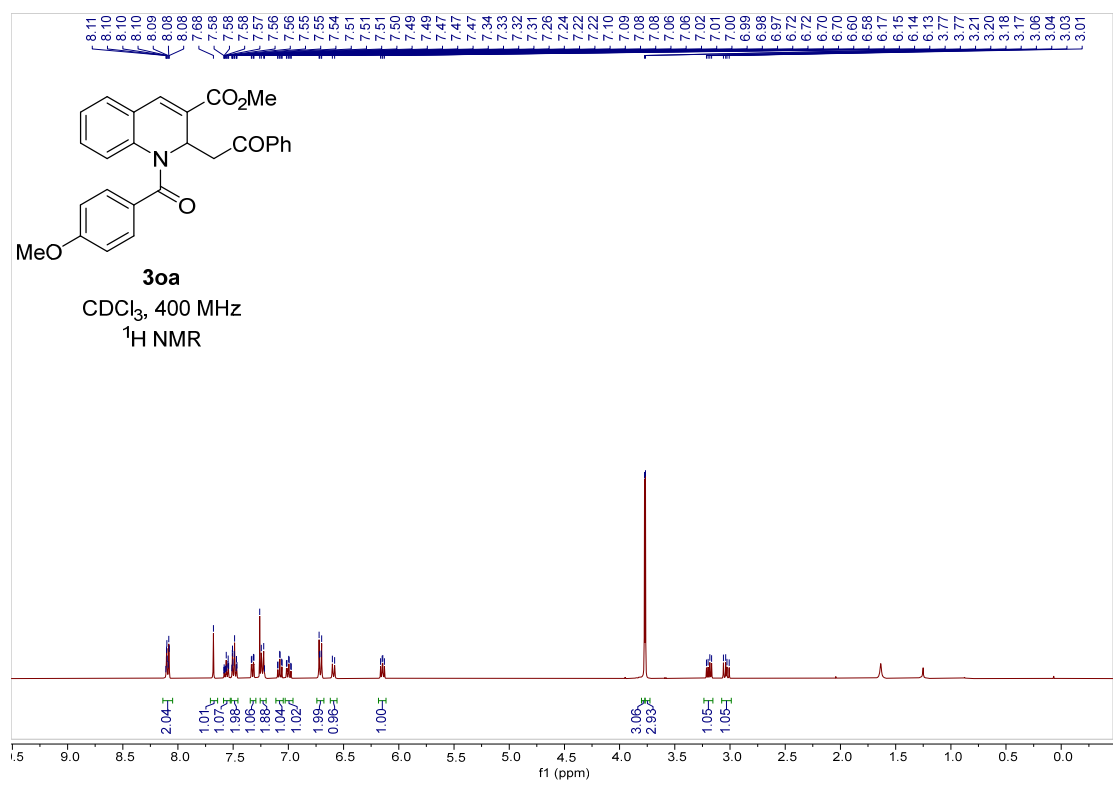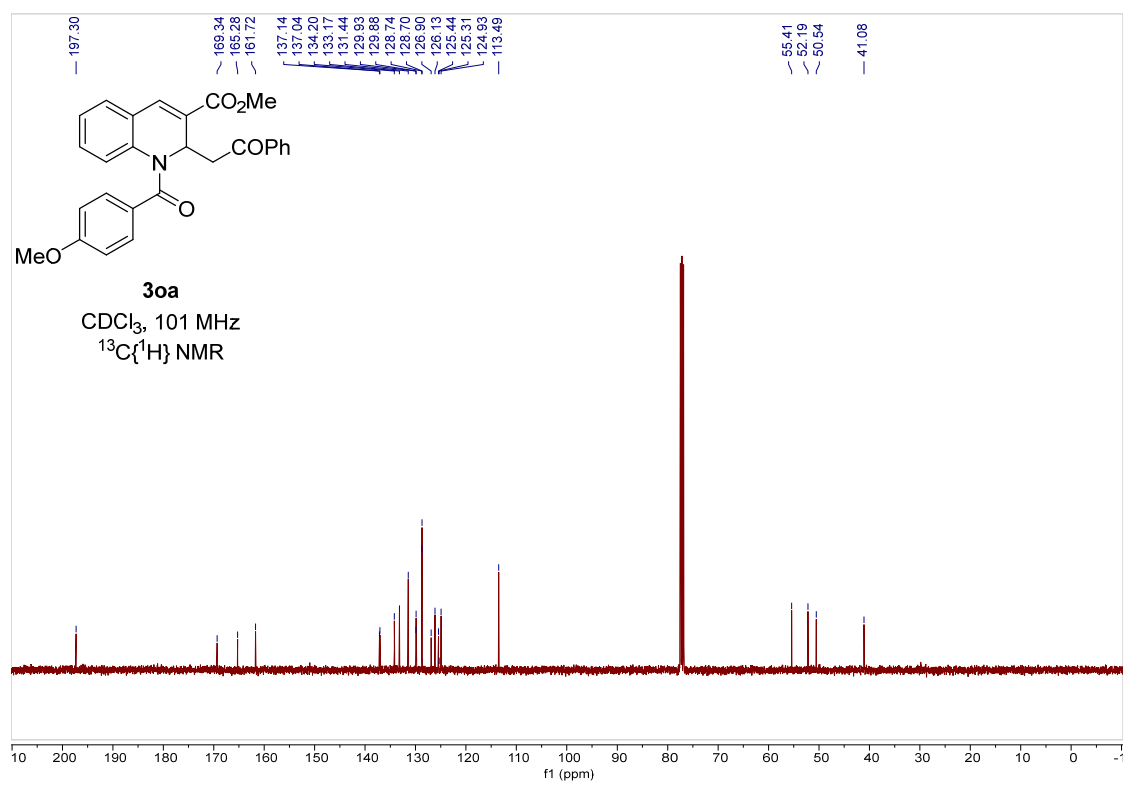

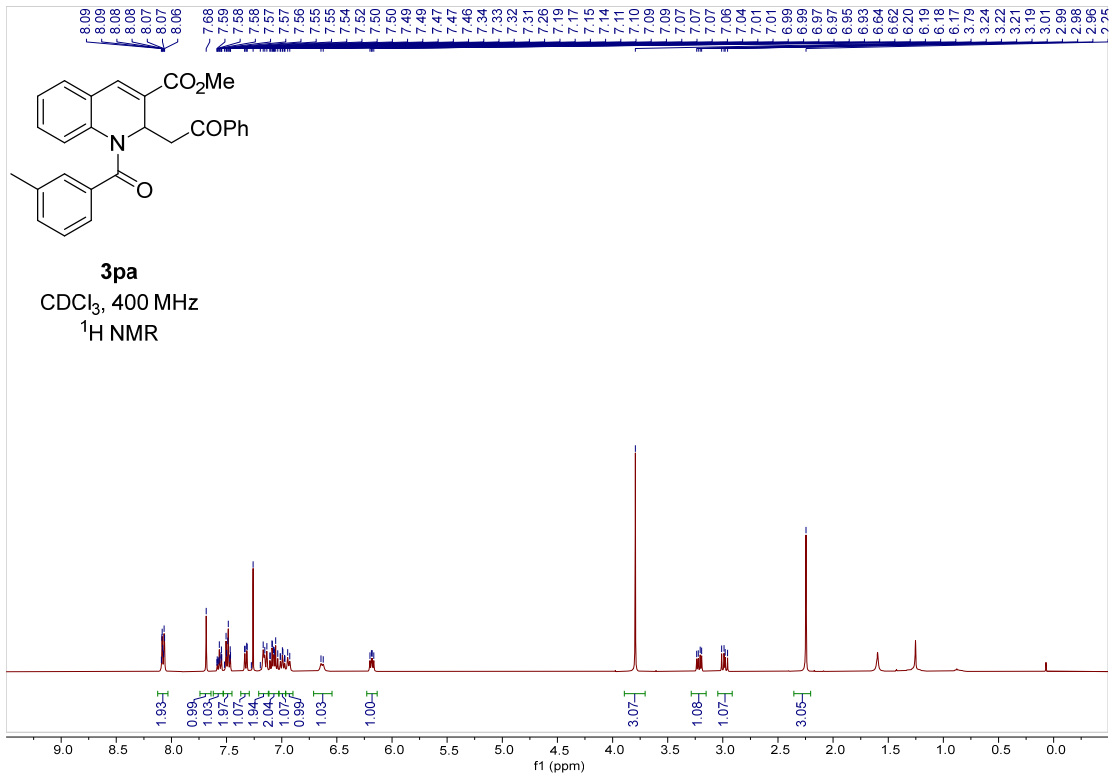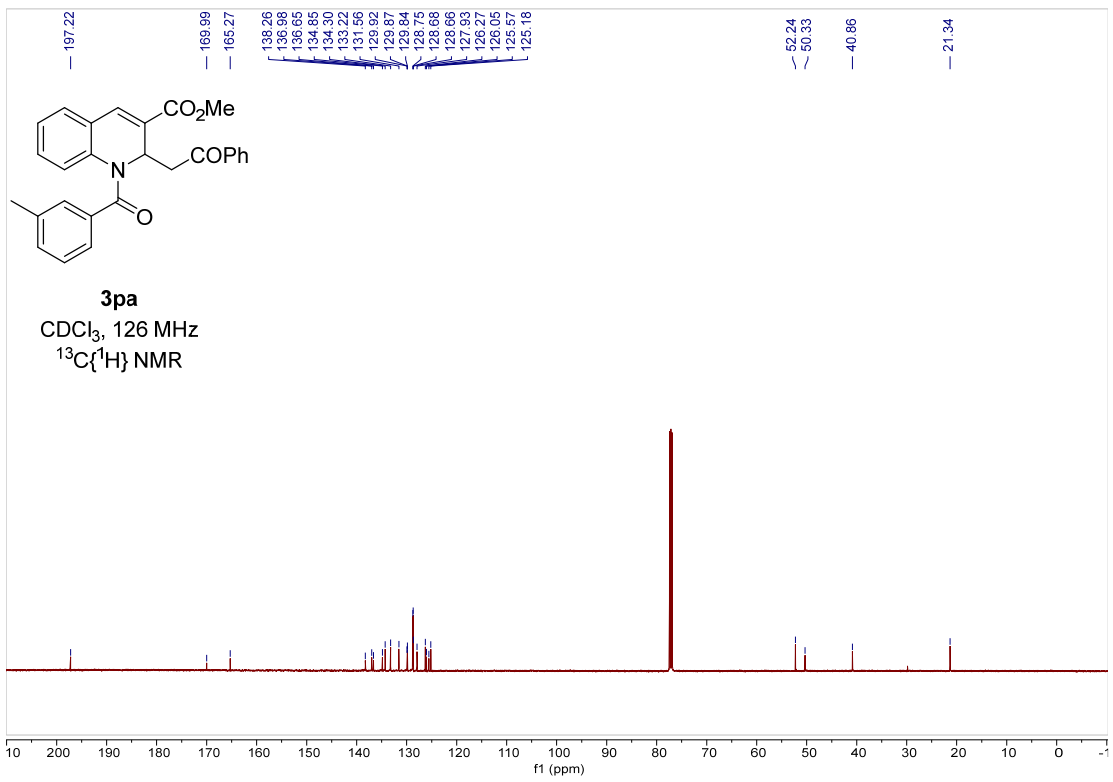

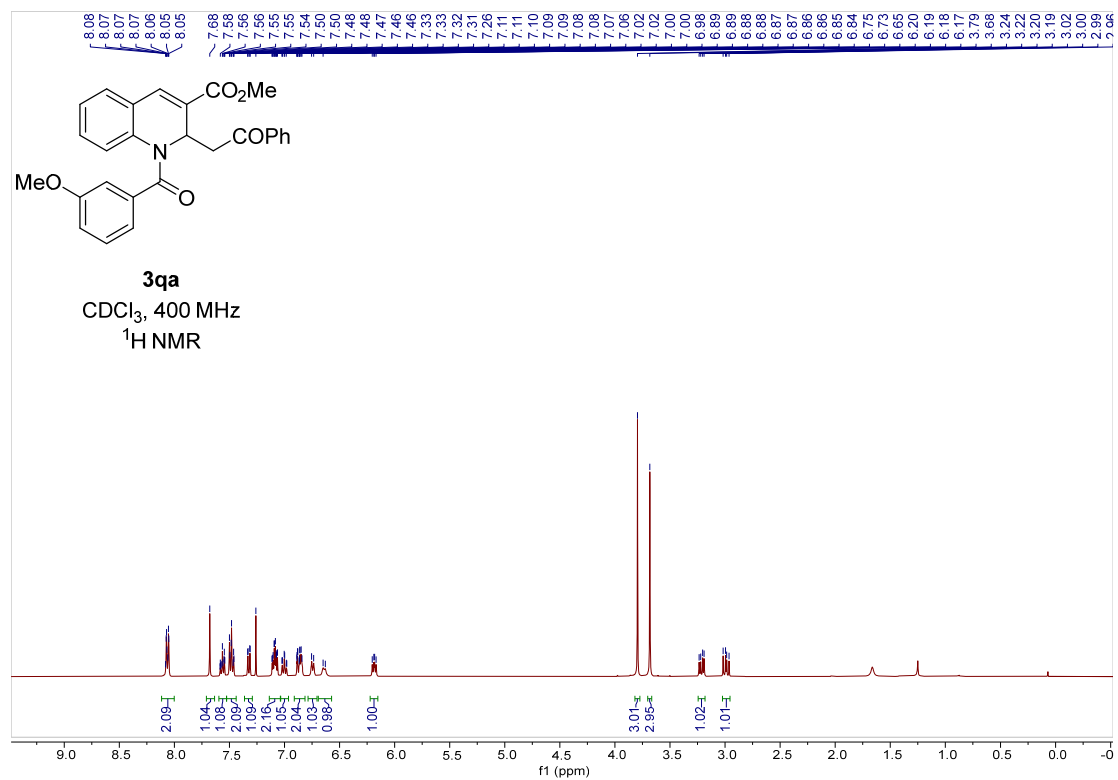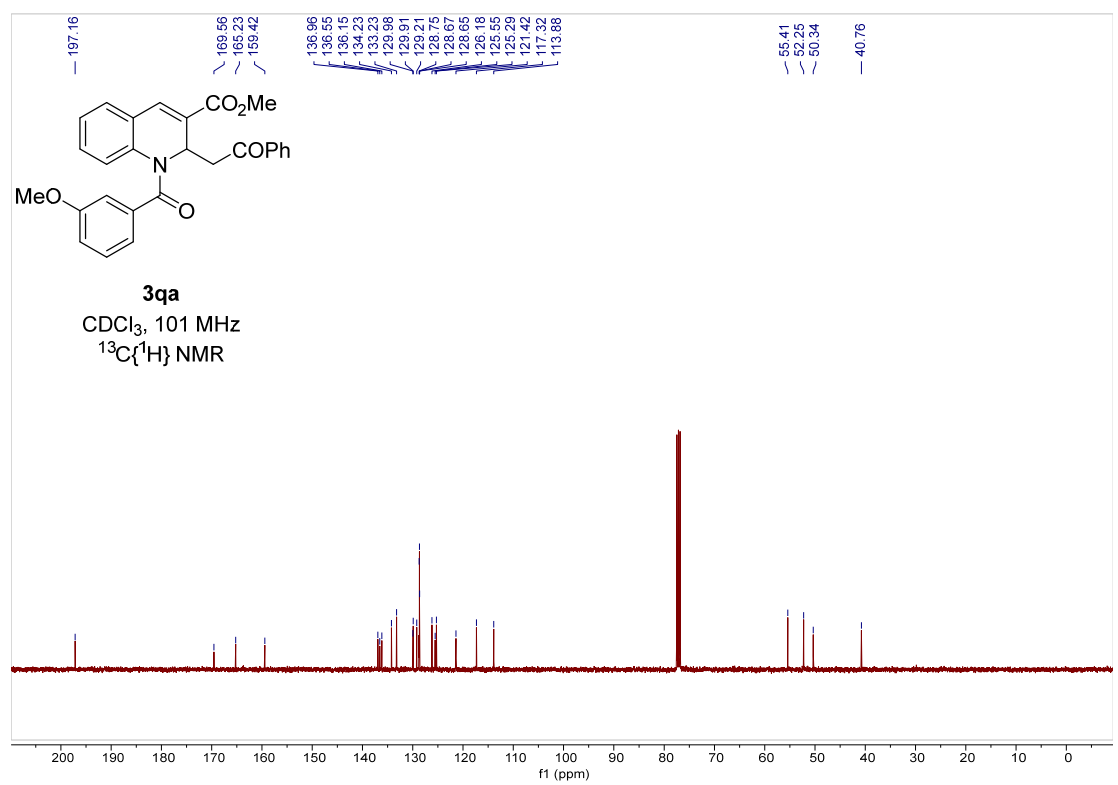

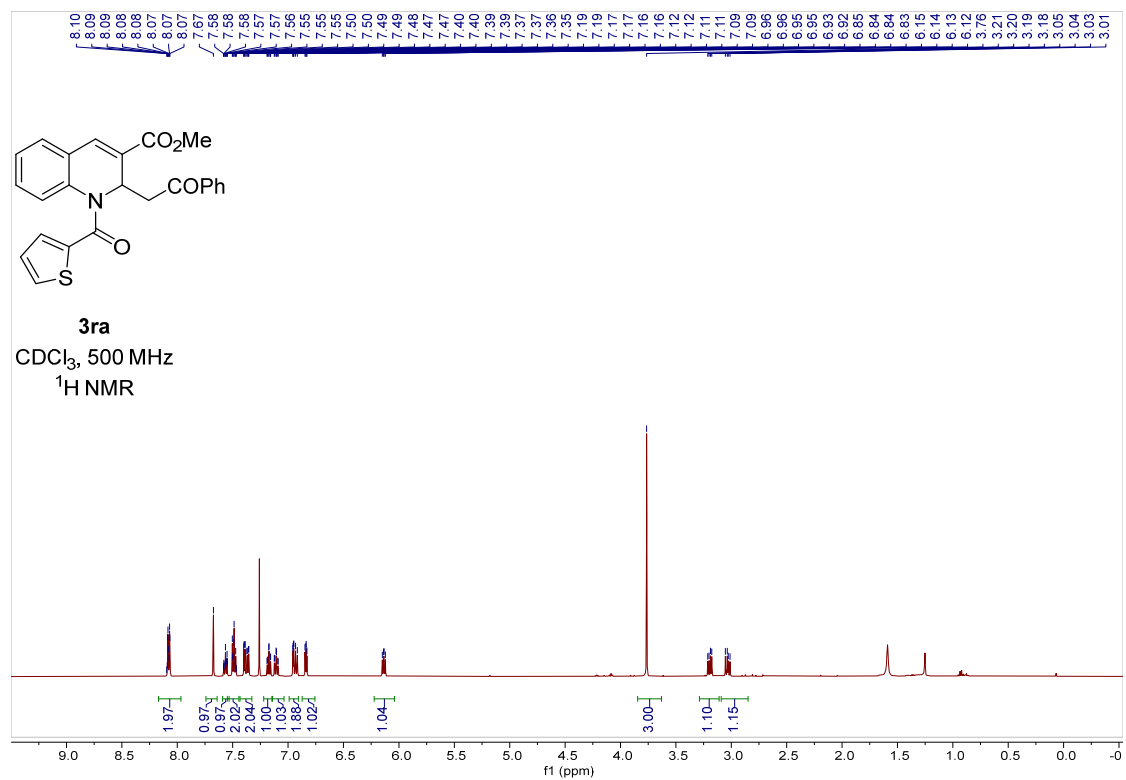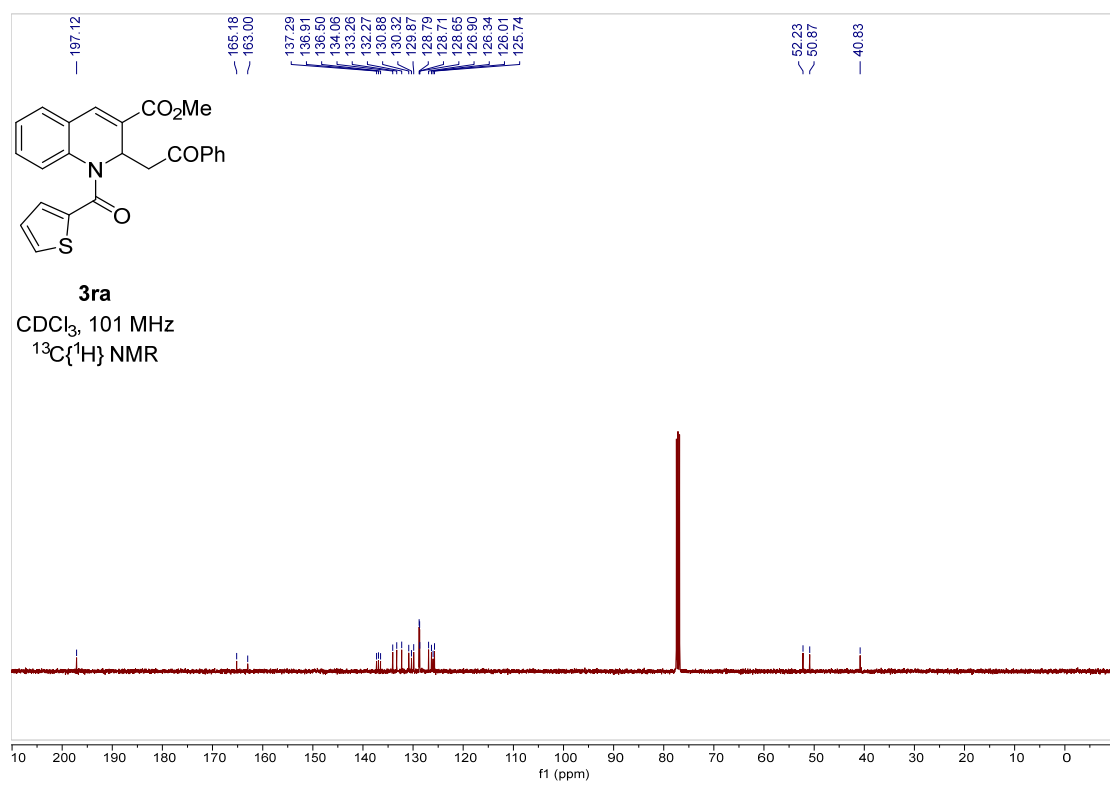

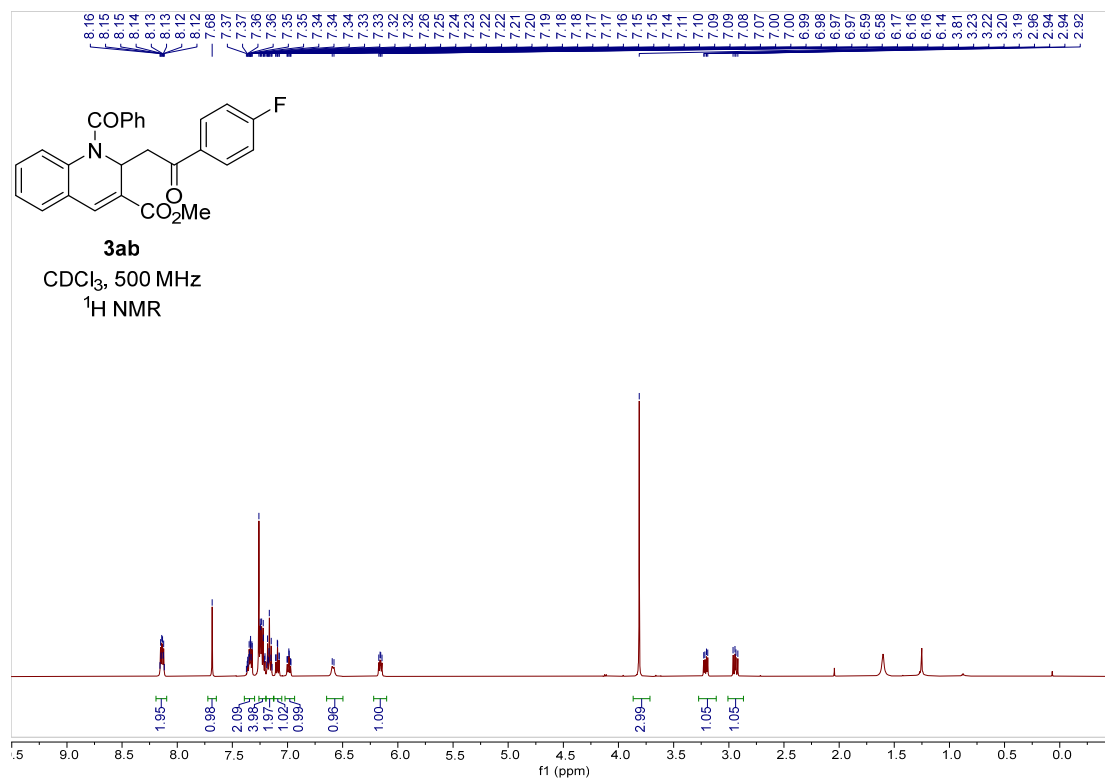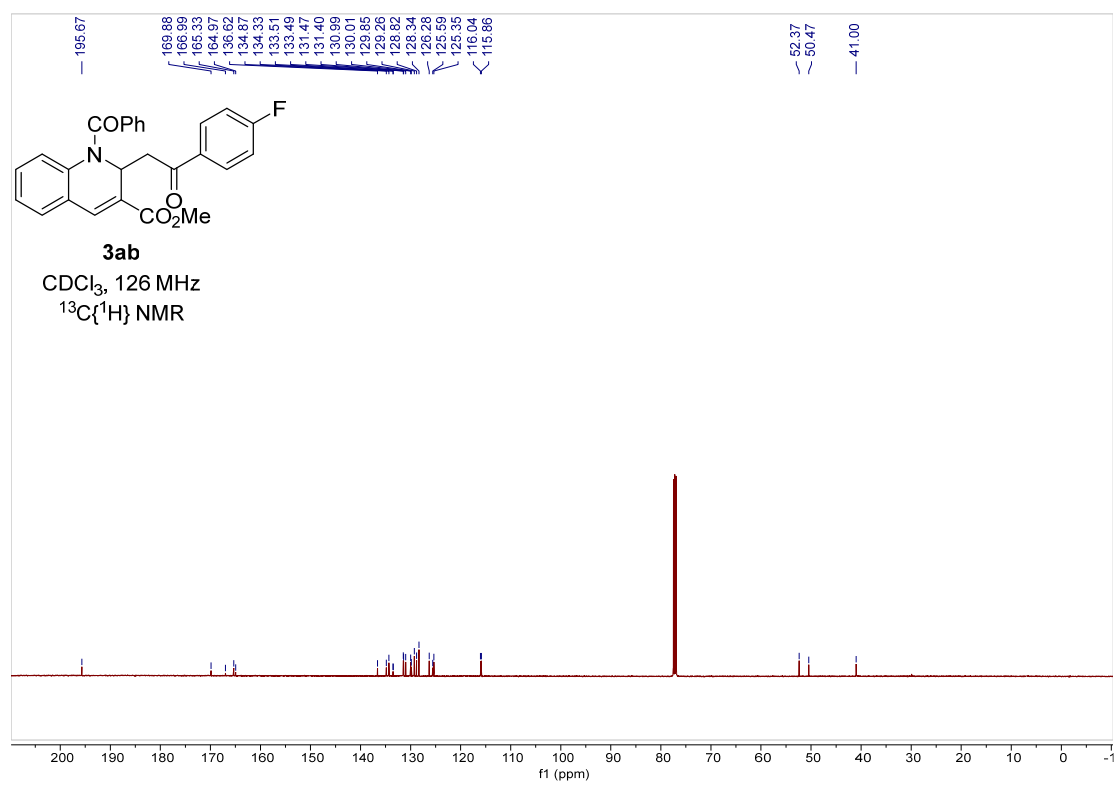

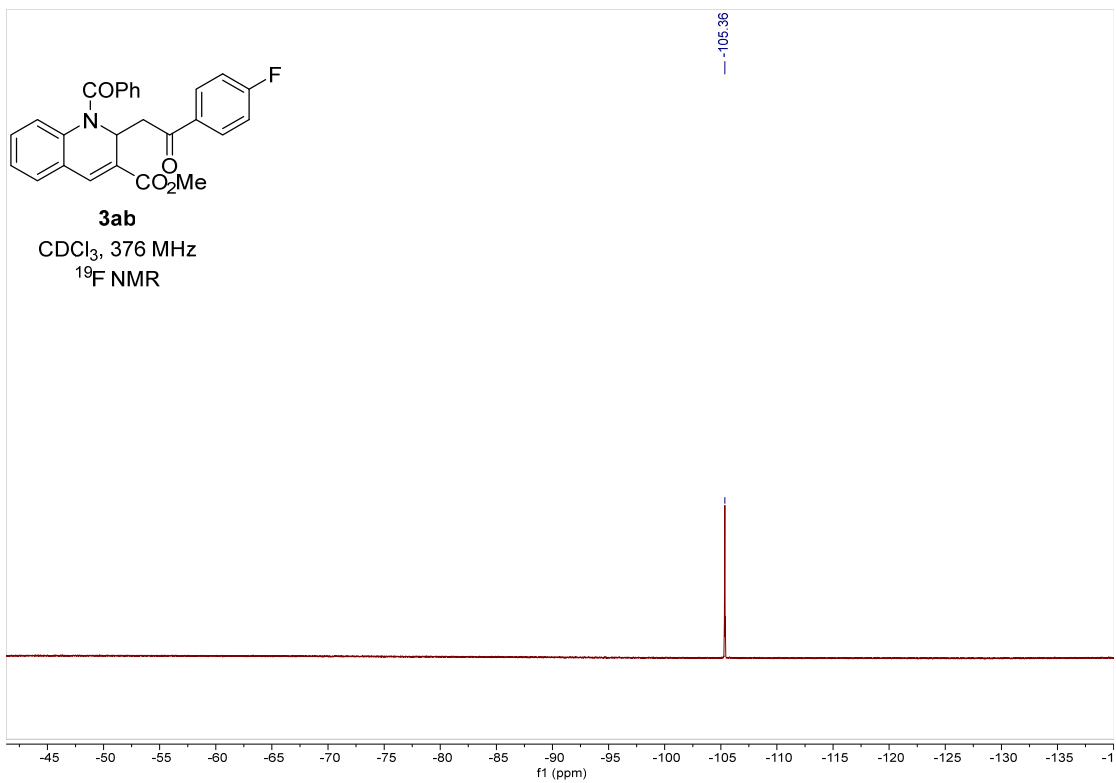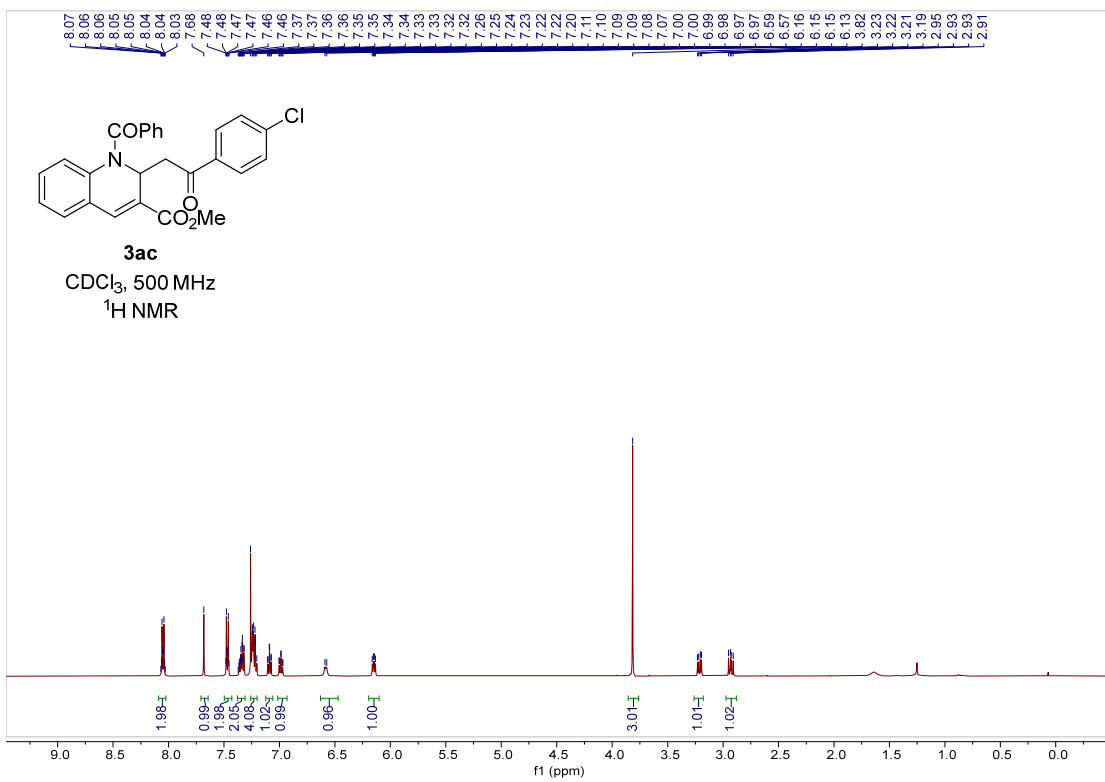



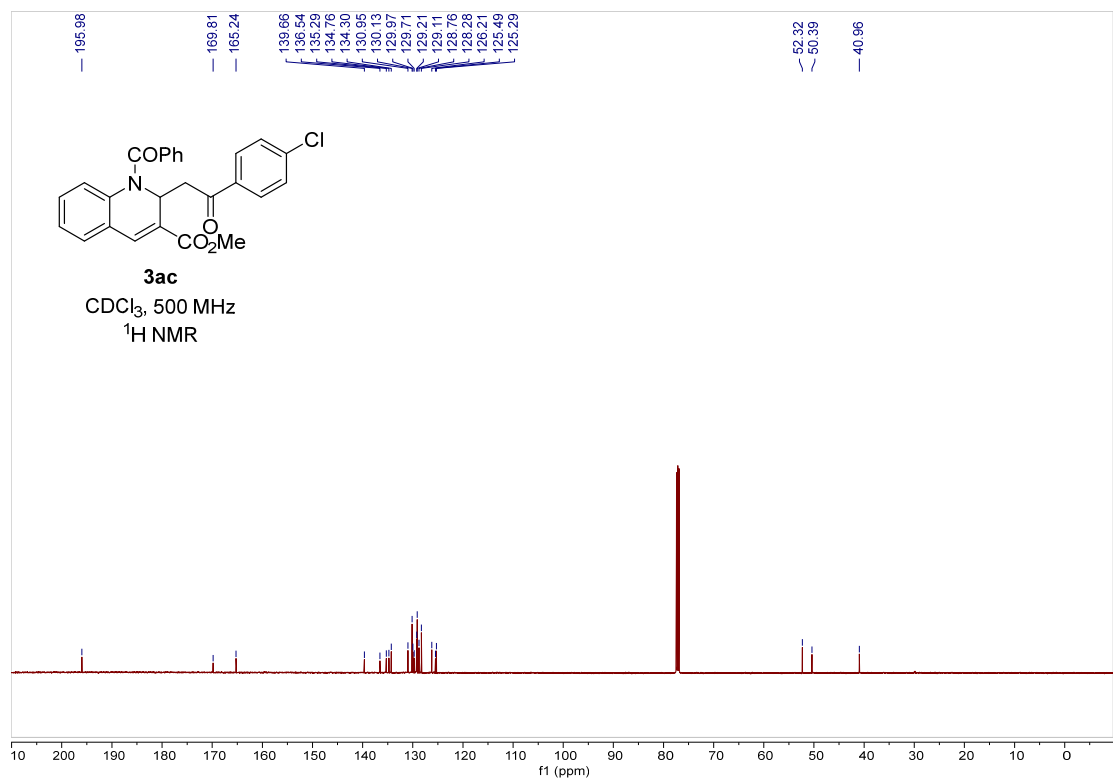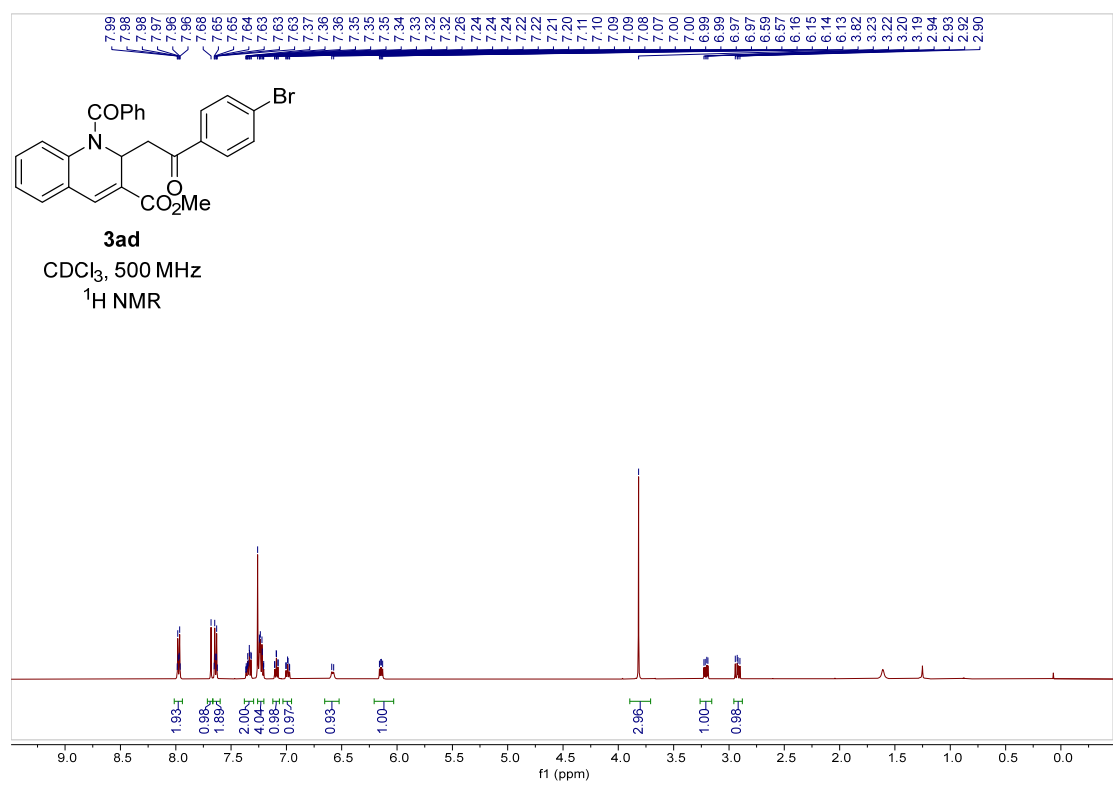

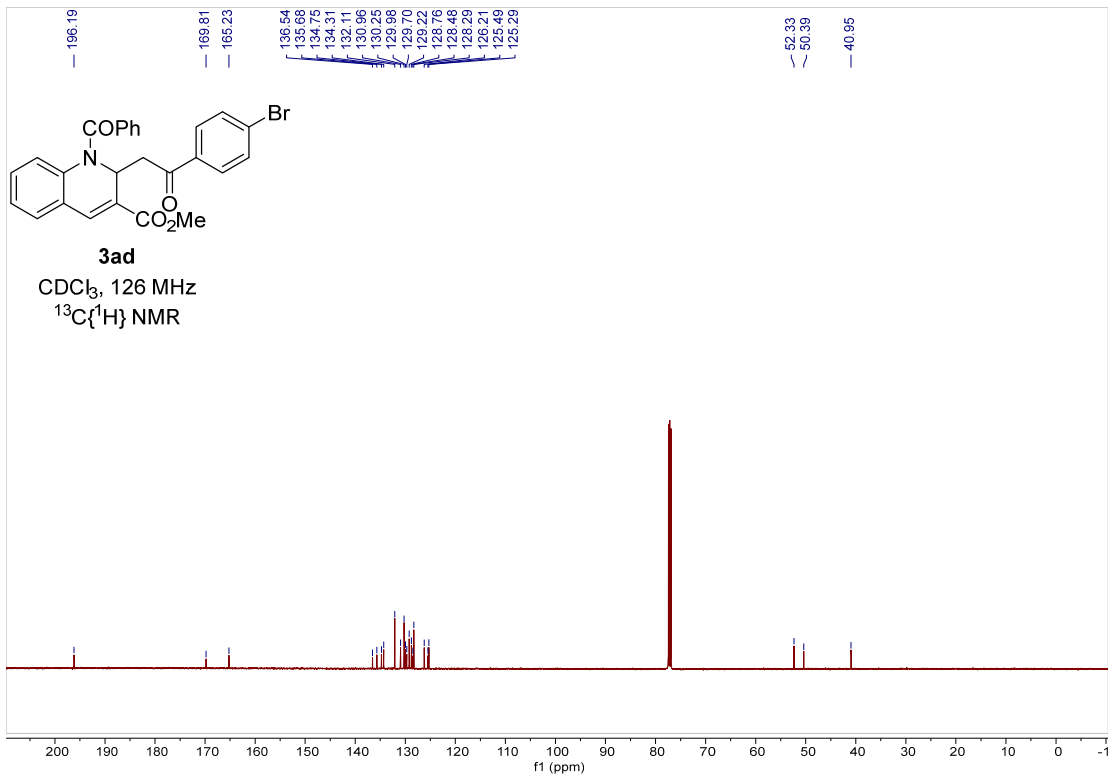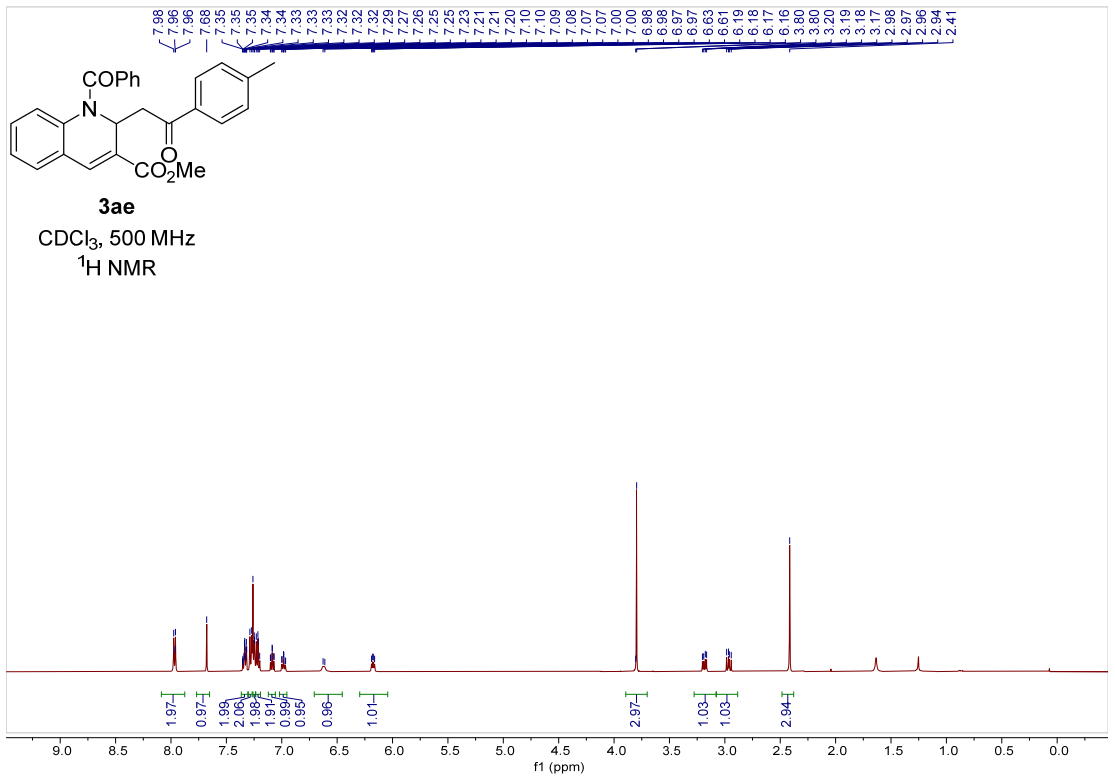

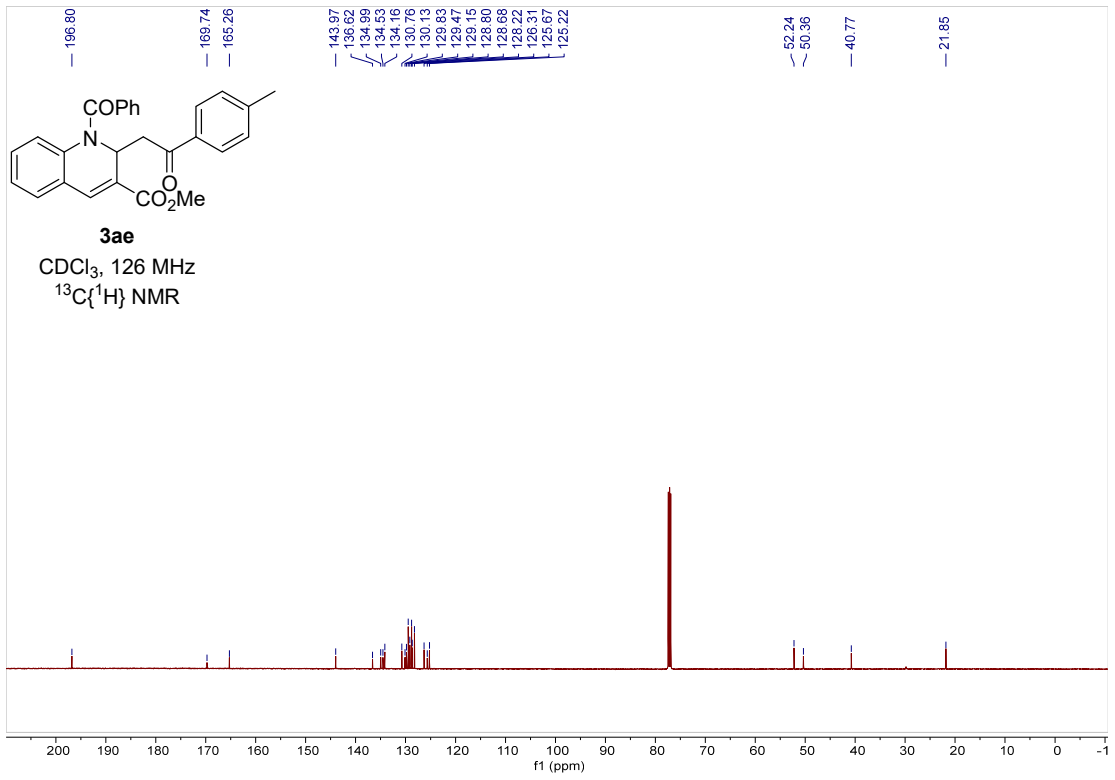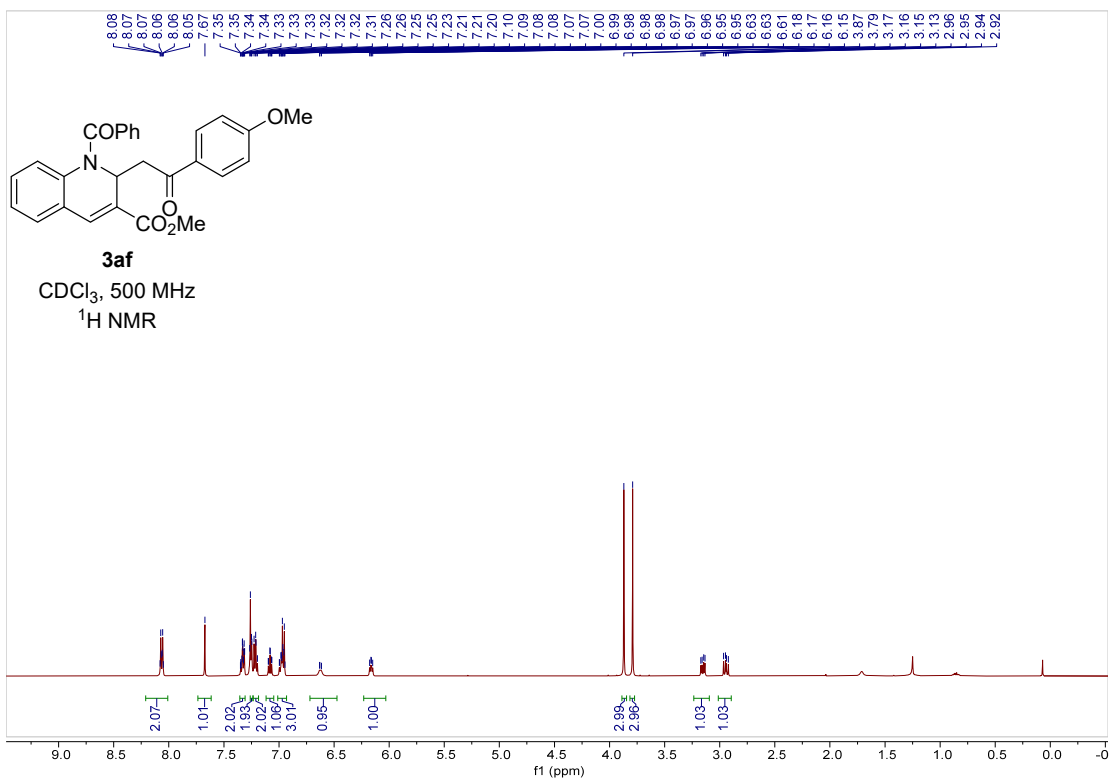

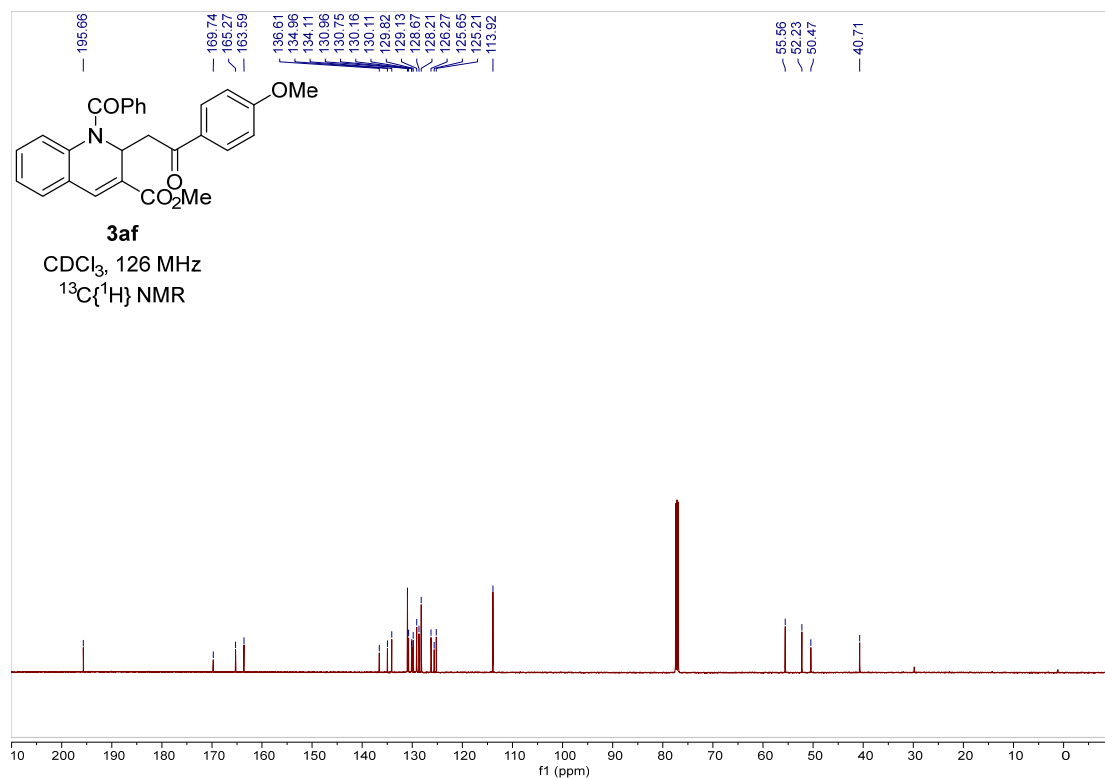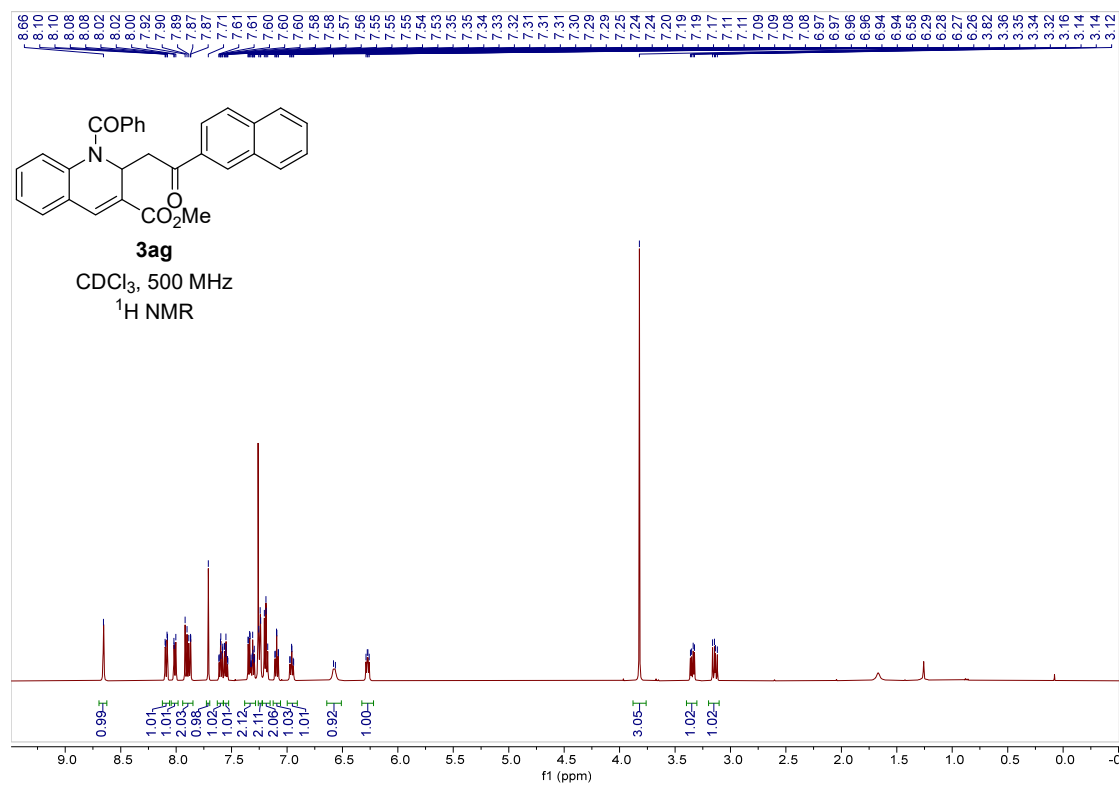

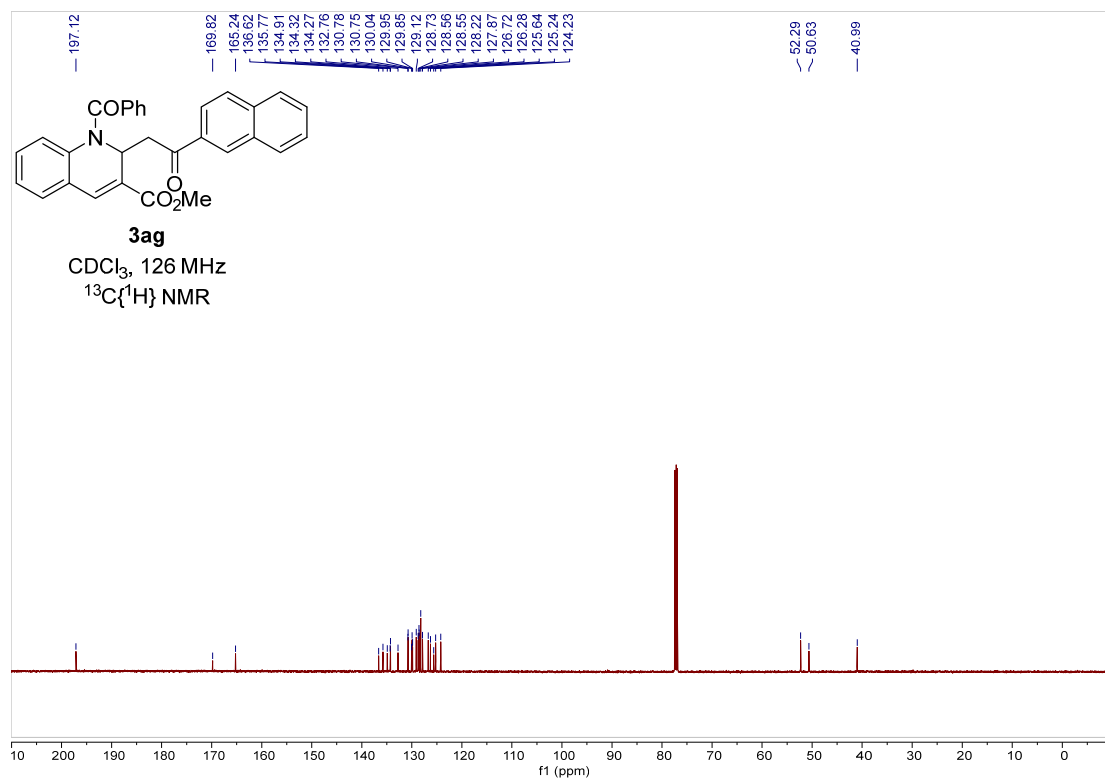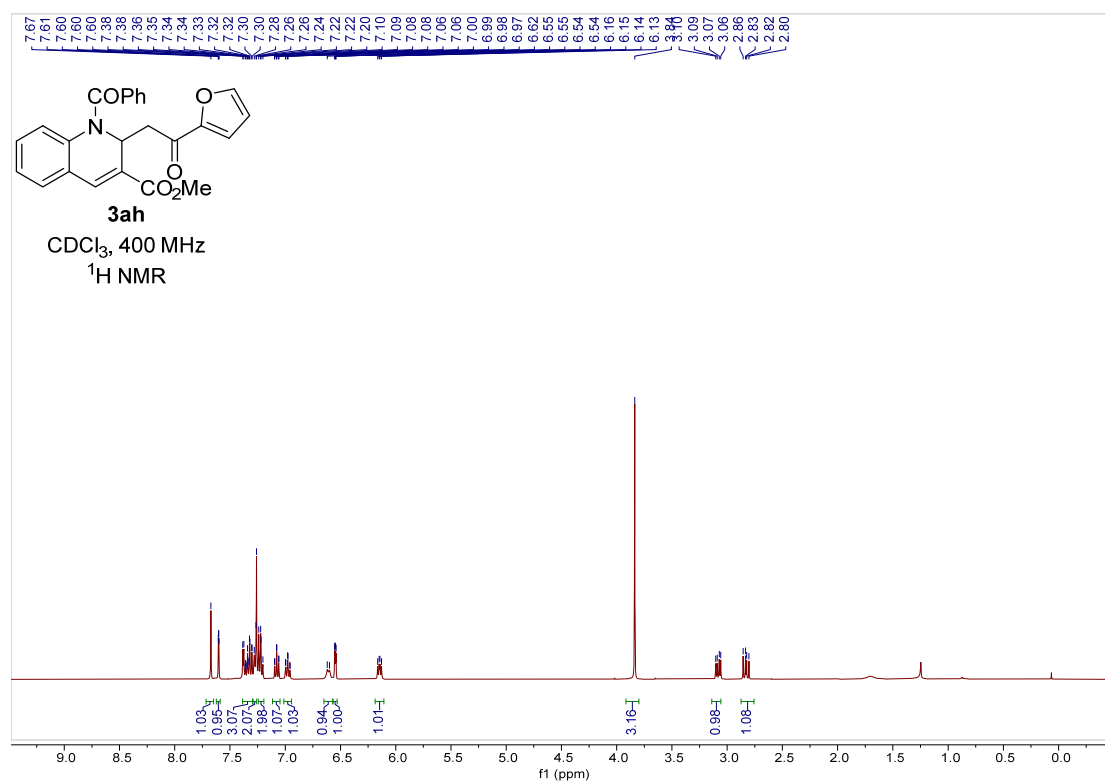

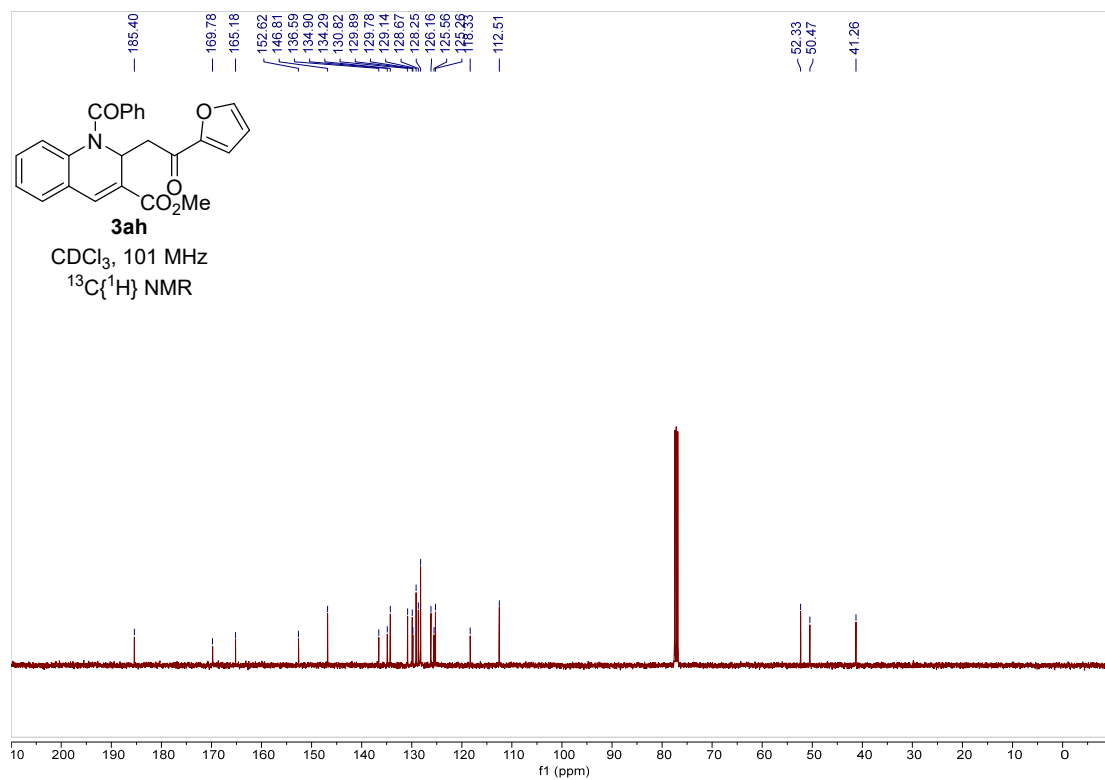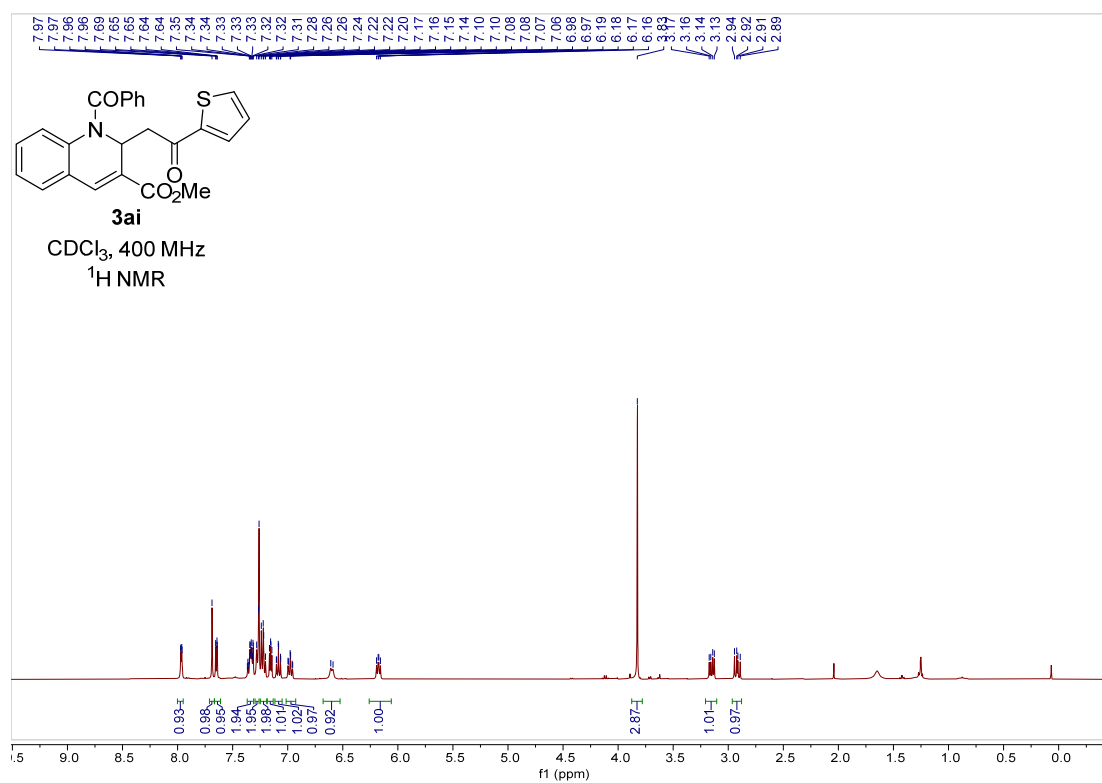

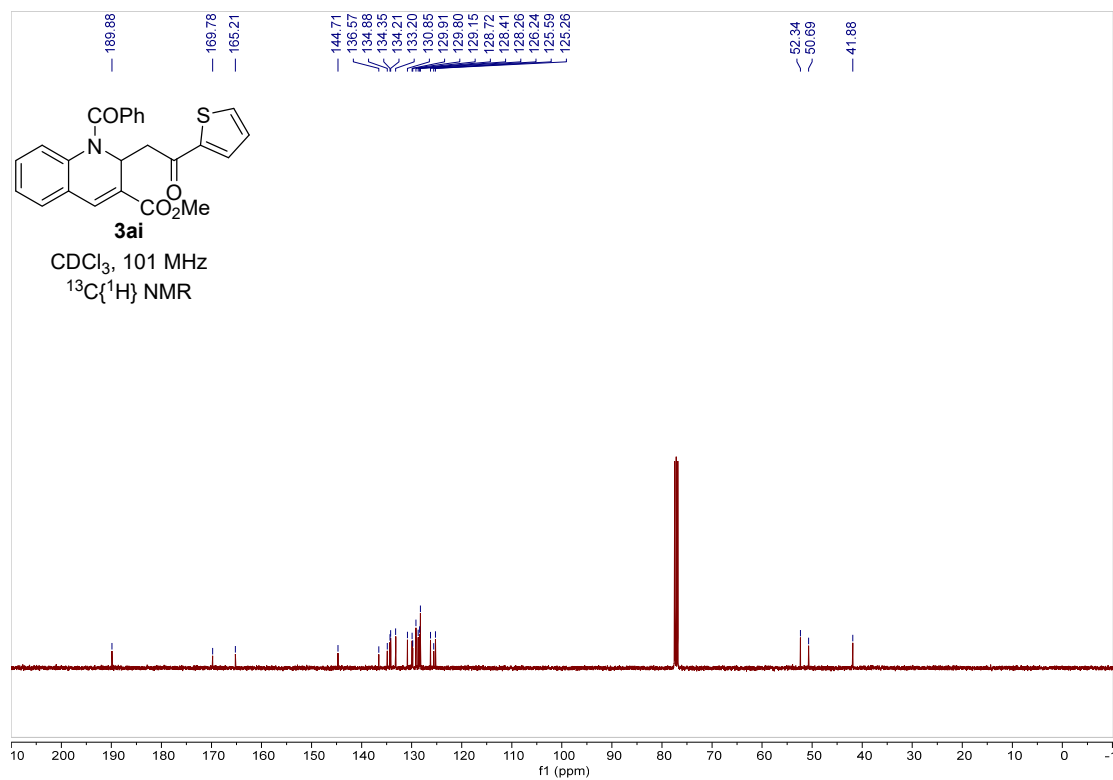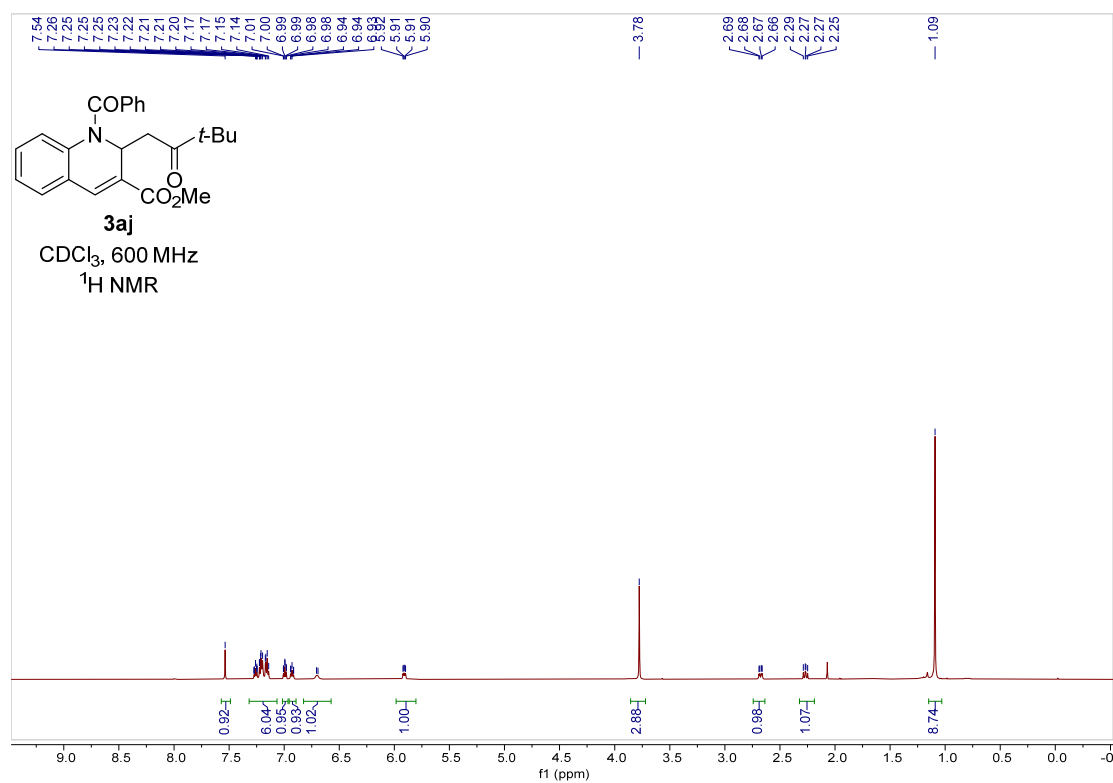

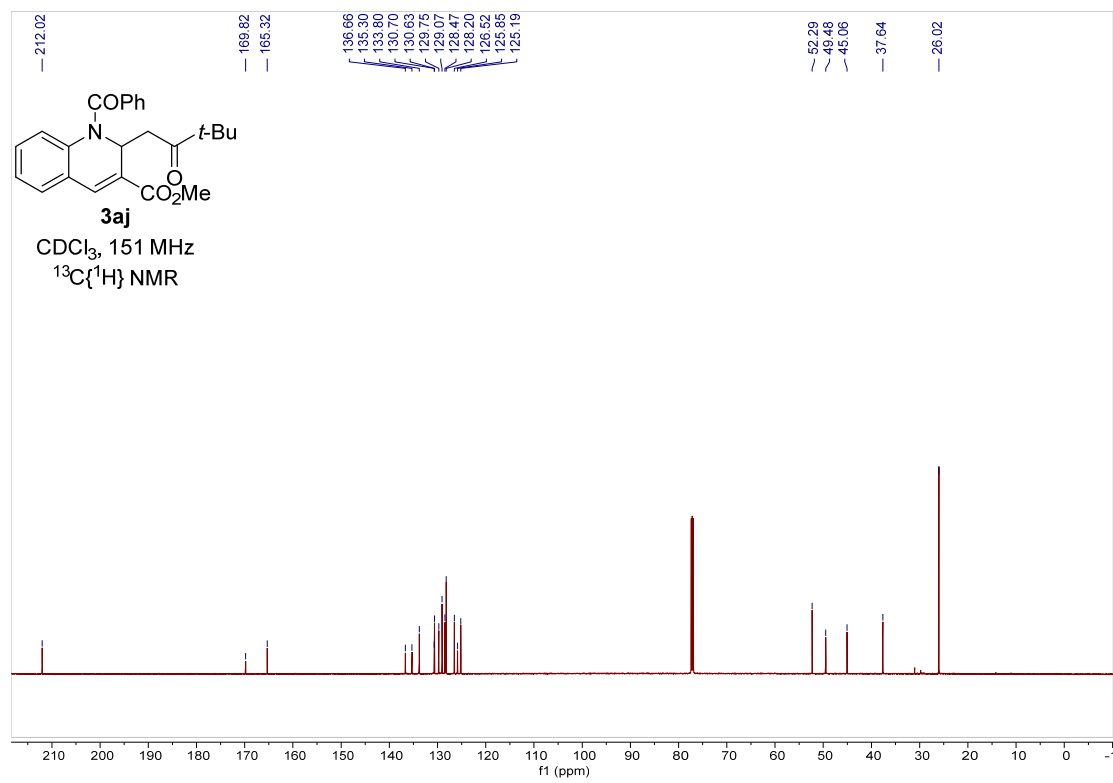



## NMR spectra of compounds 5

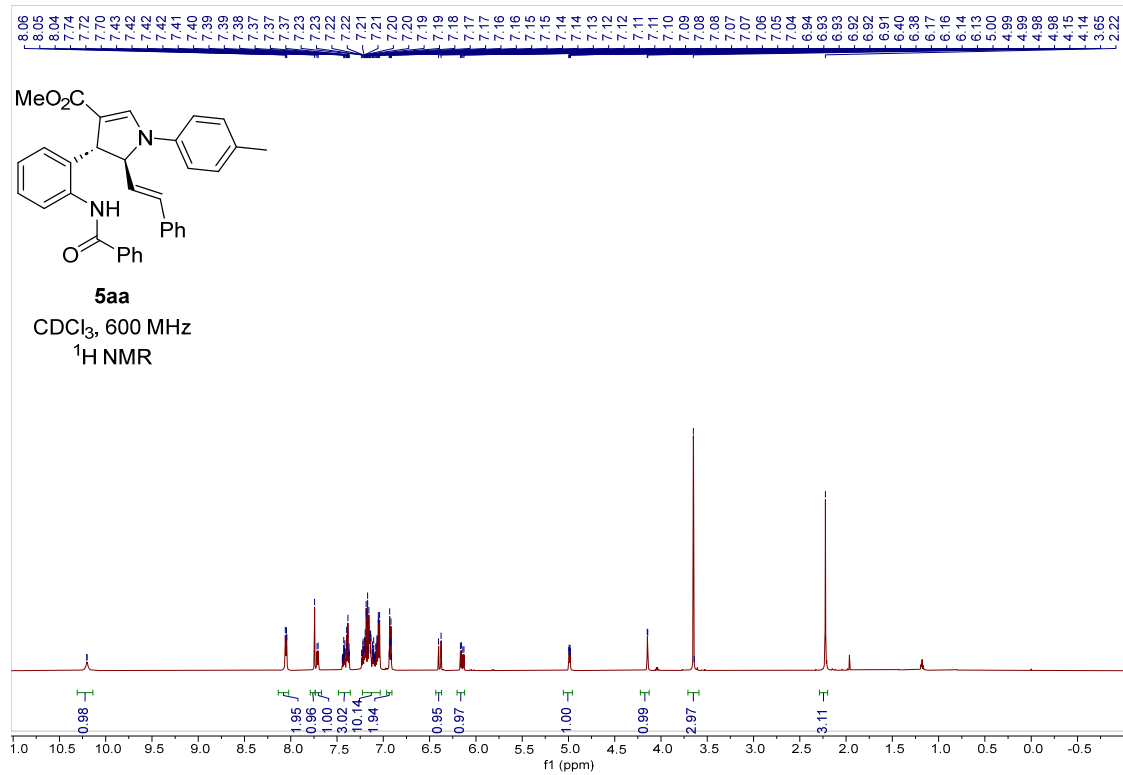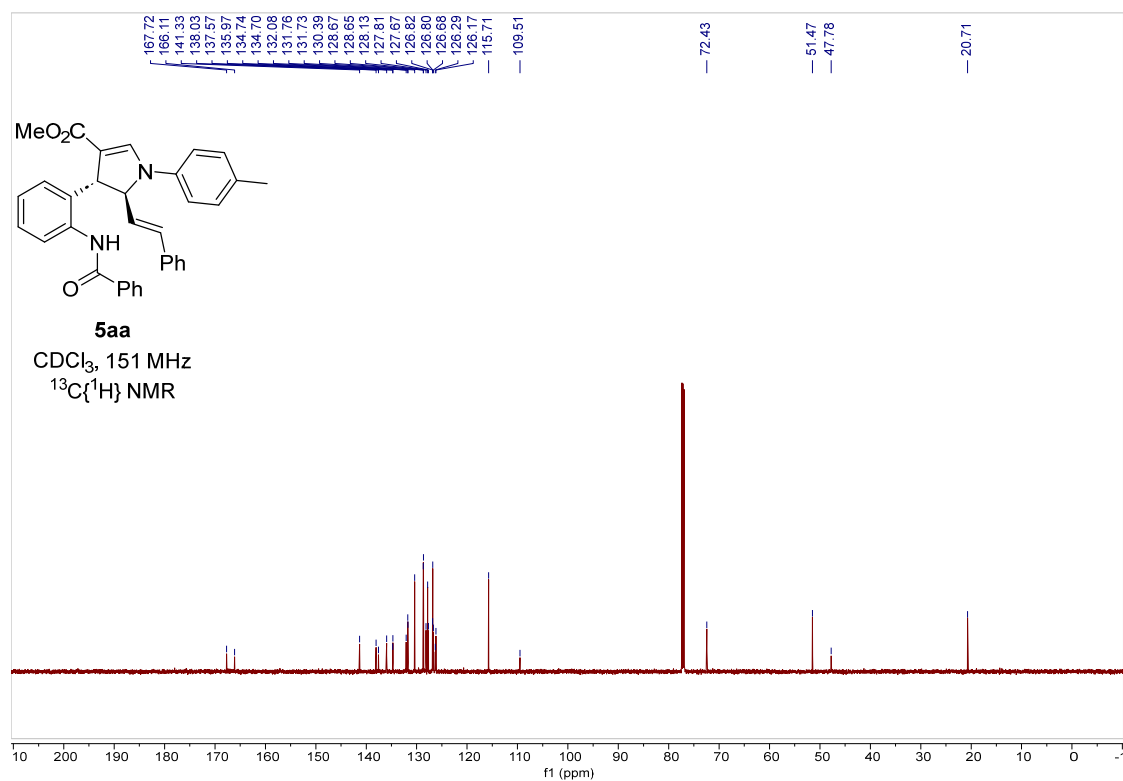

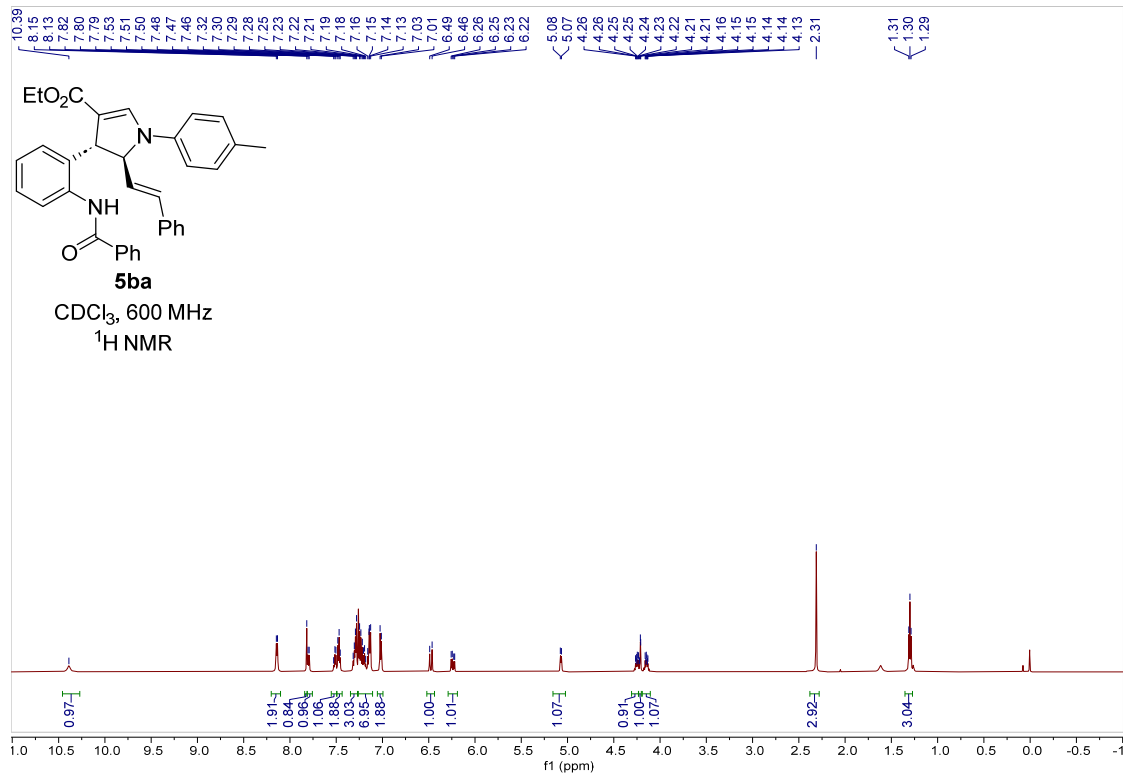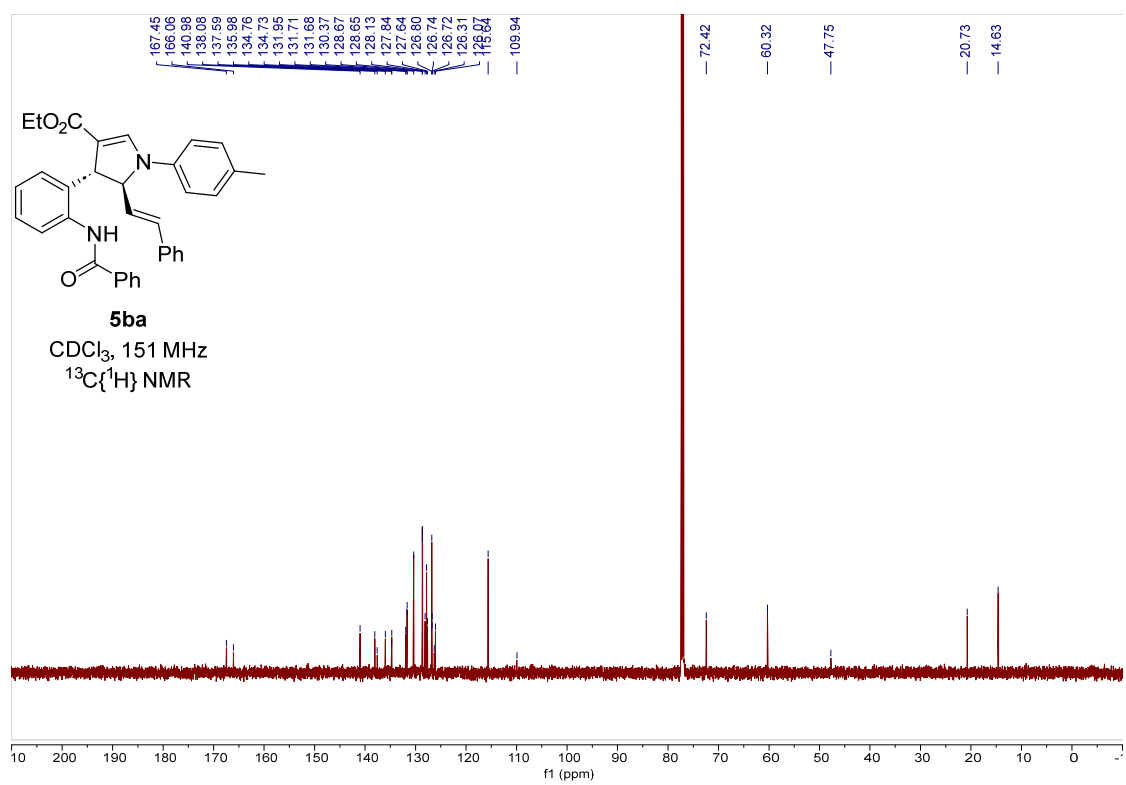

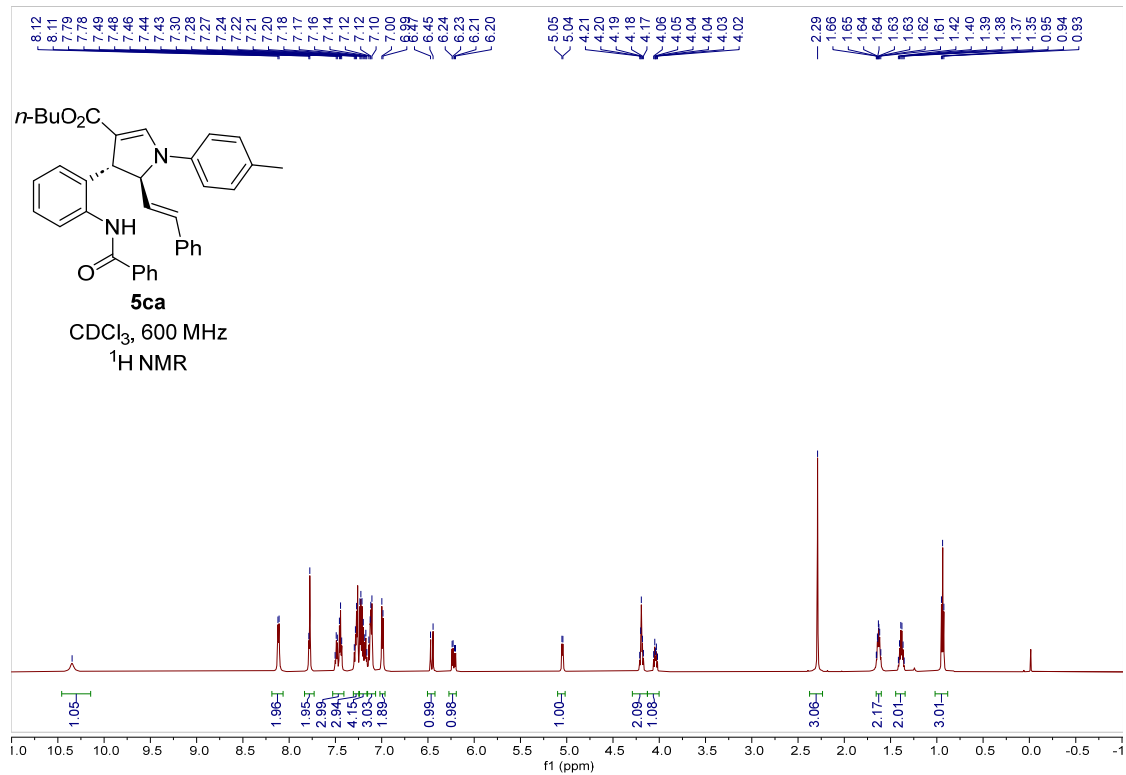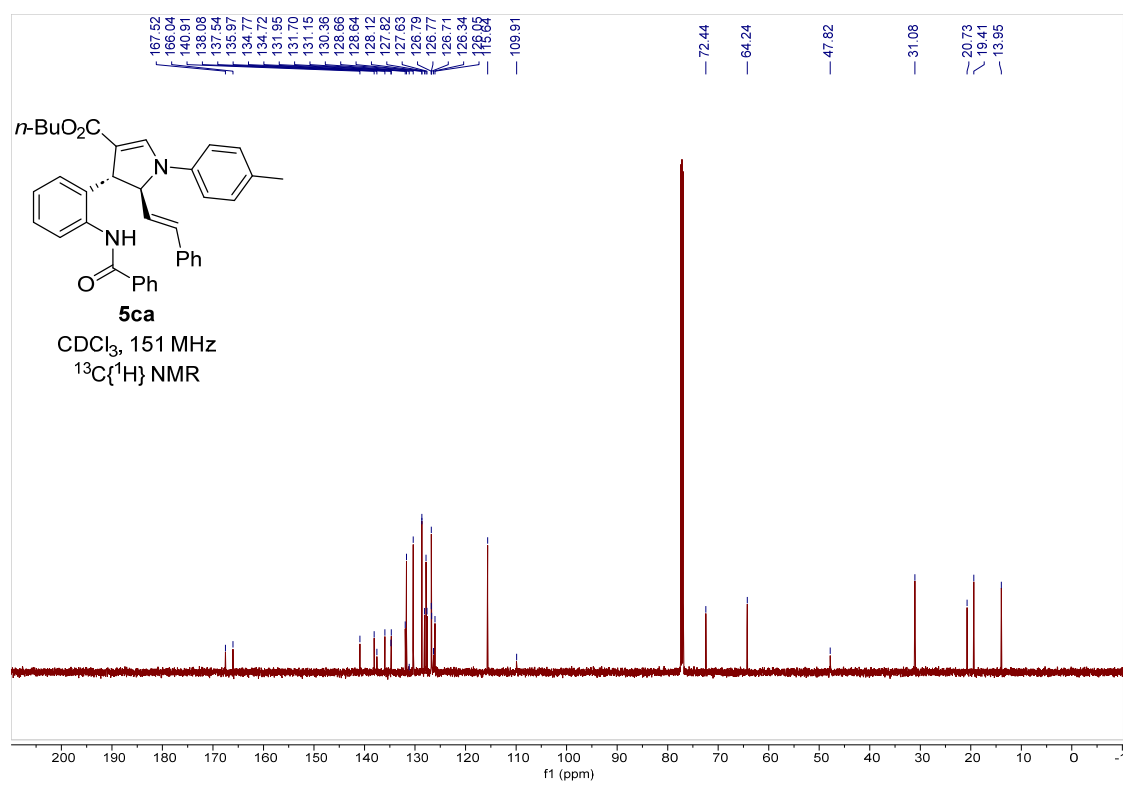

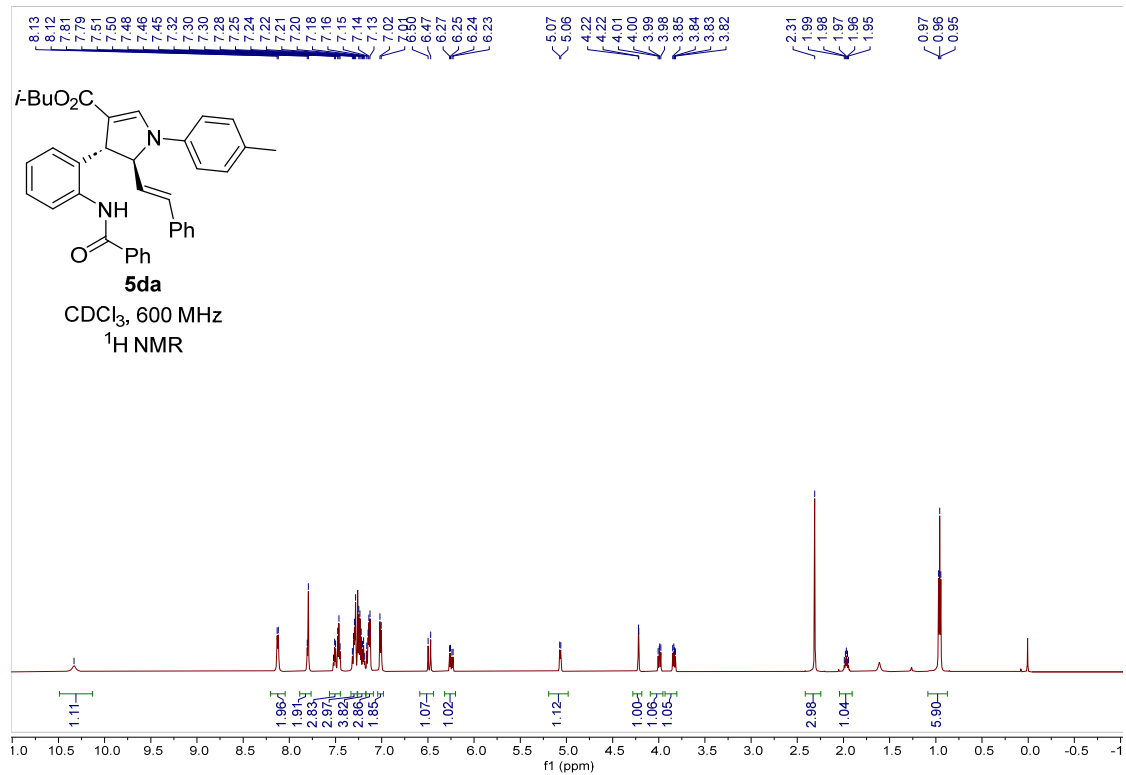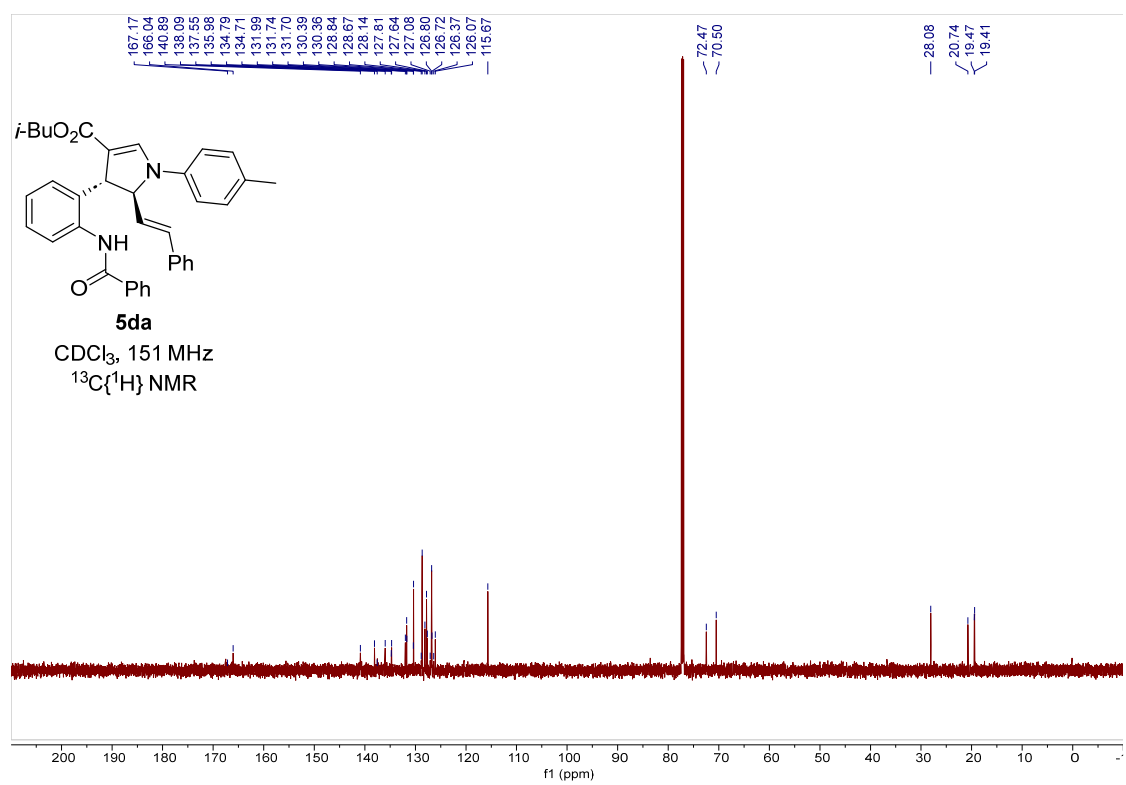

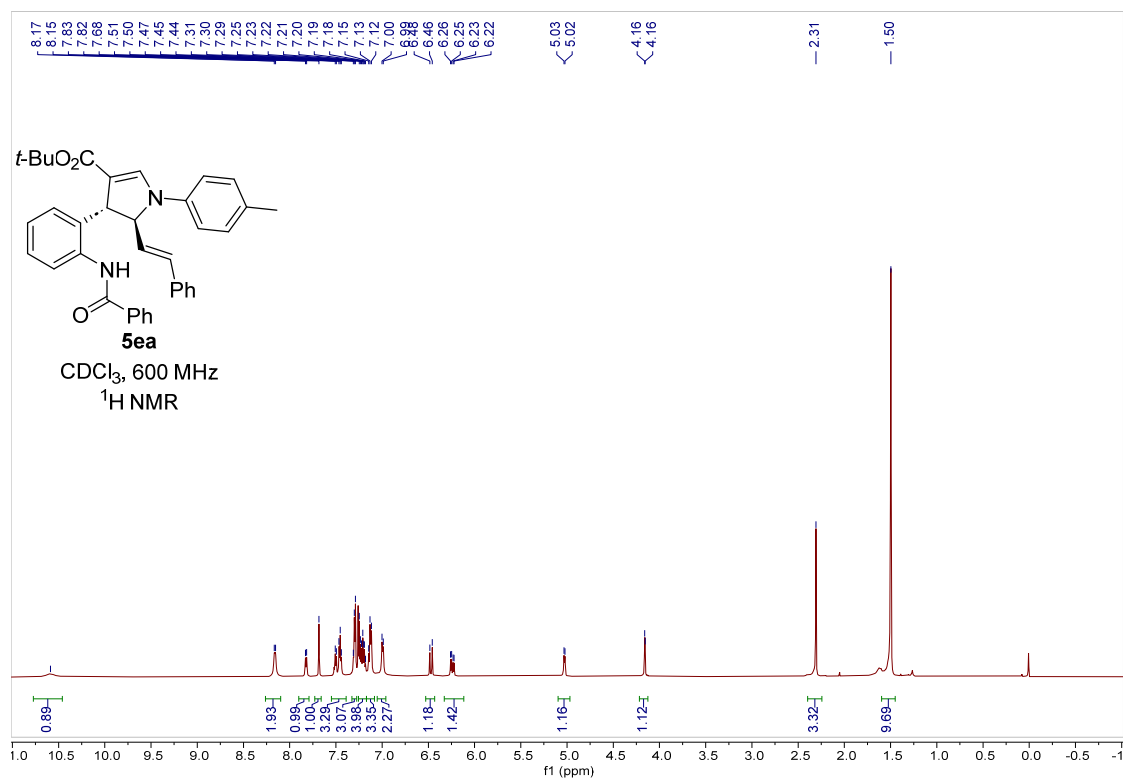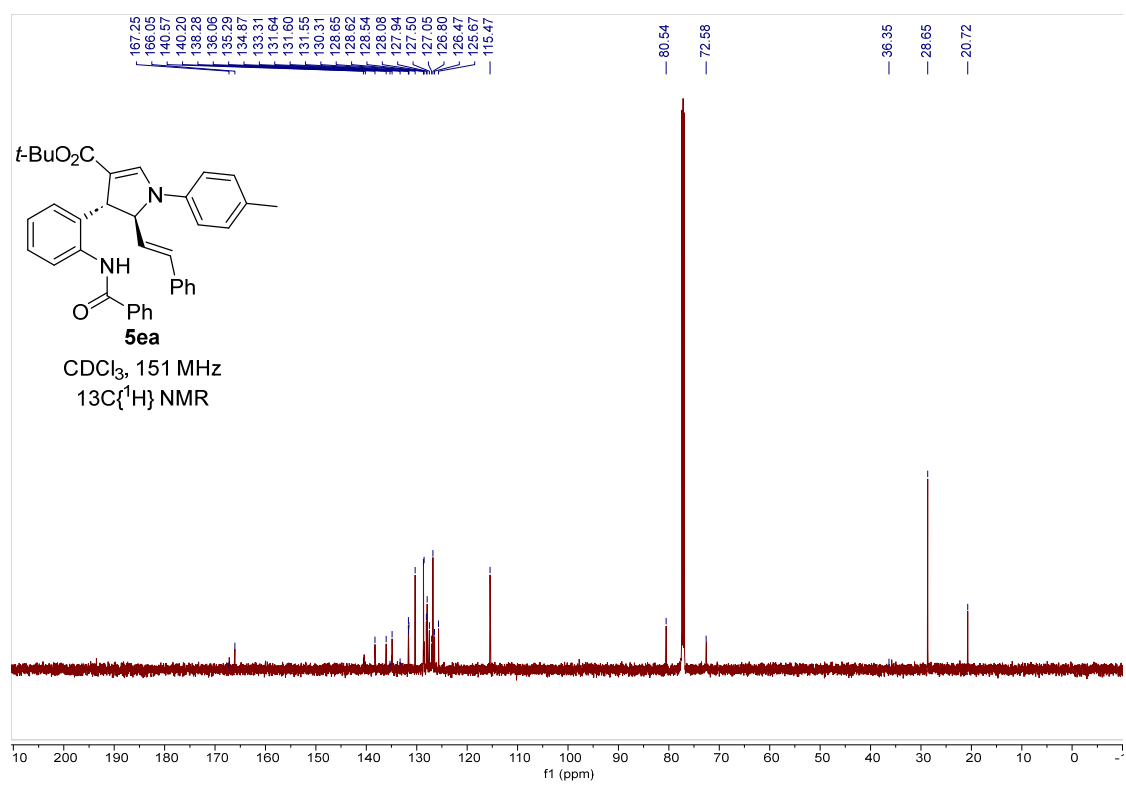

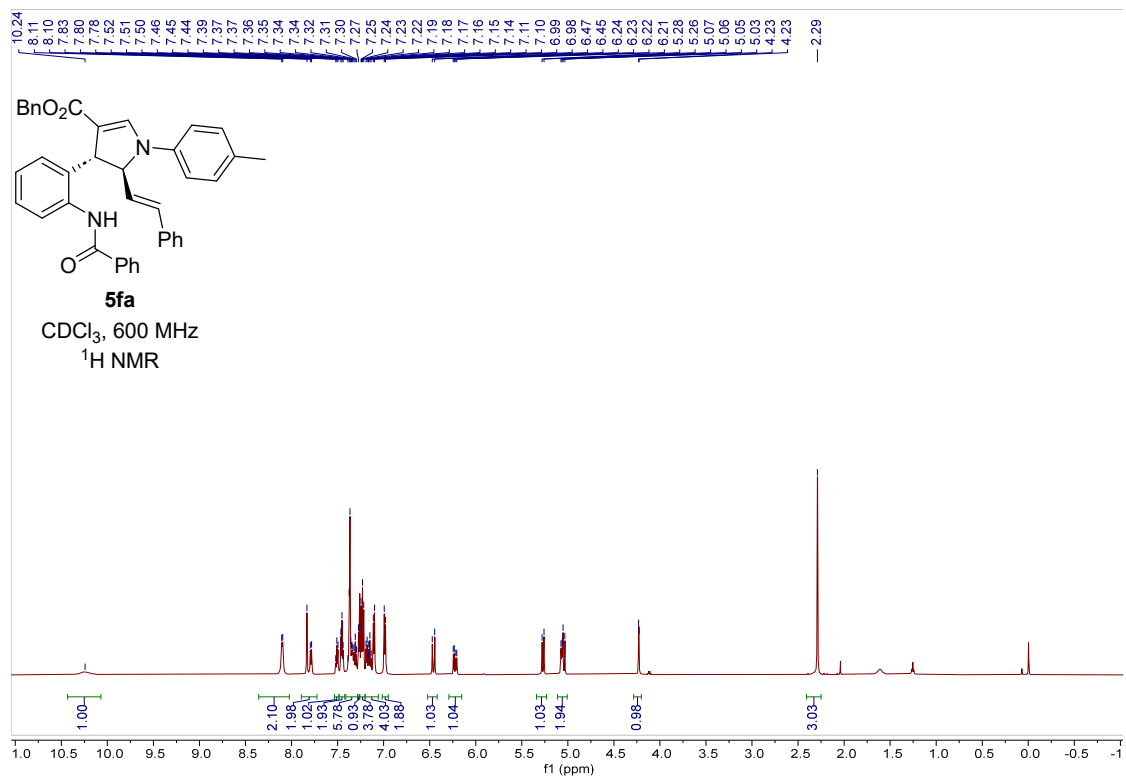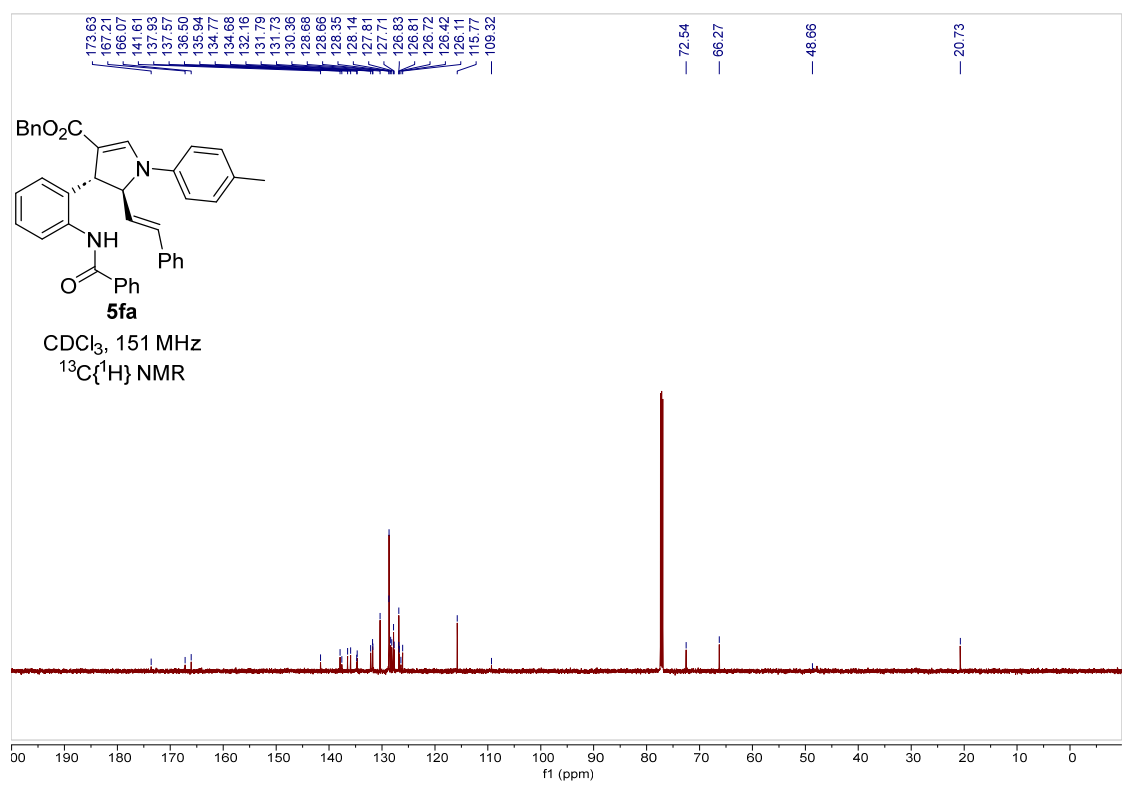

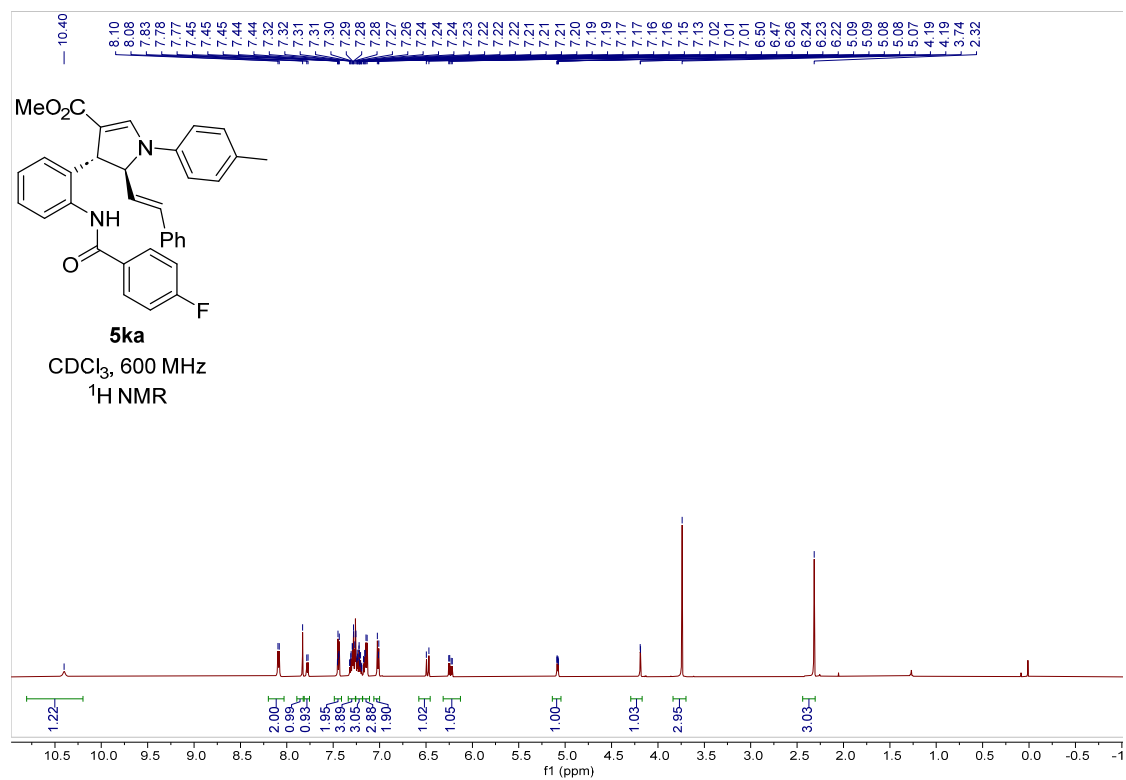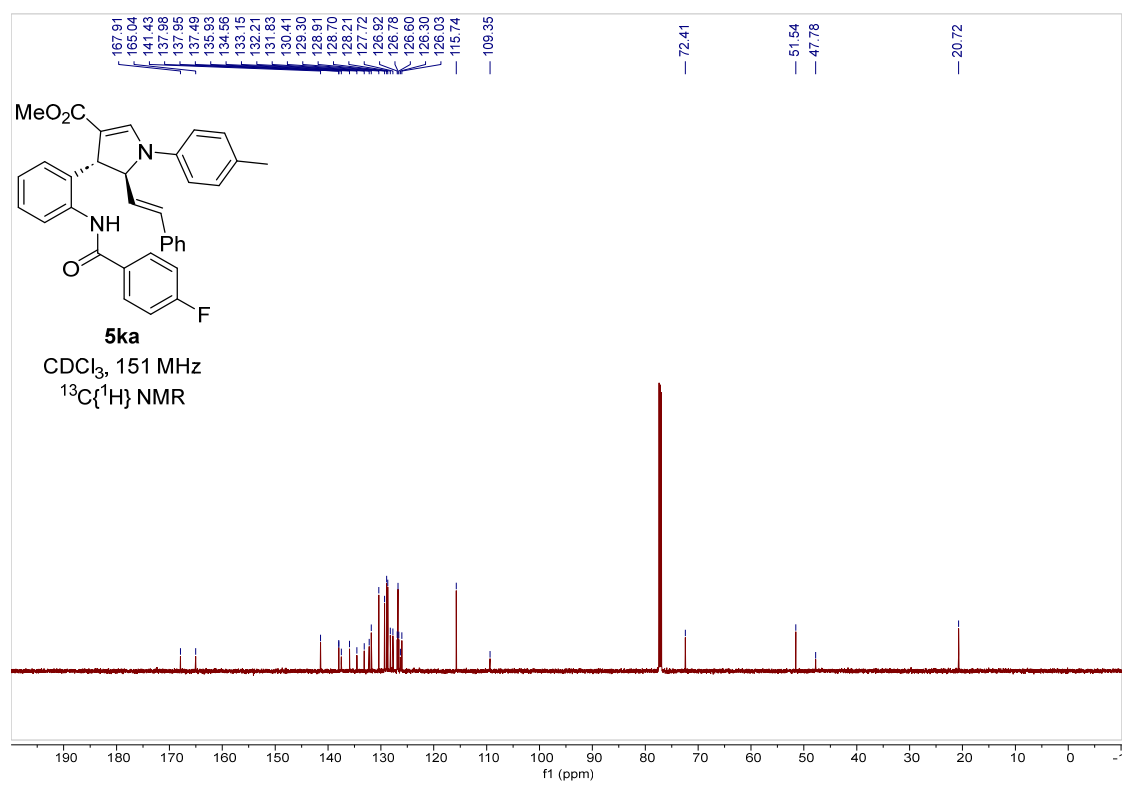

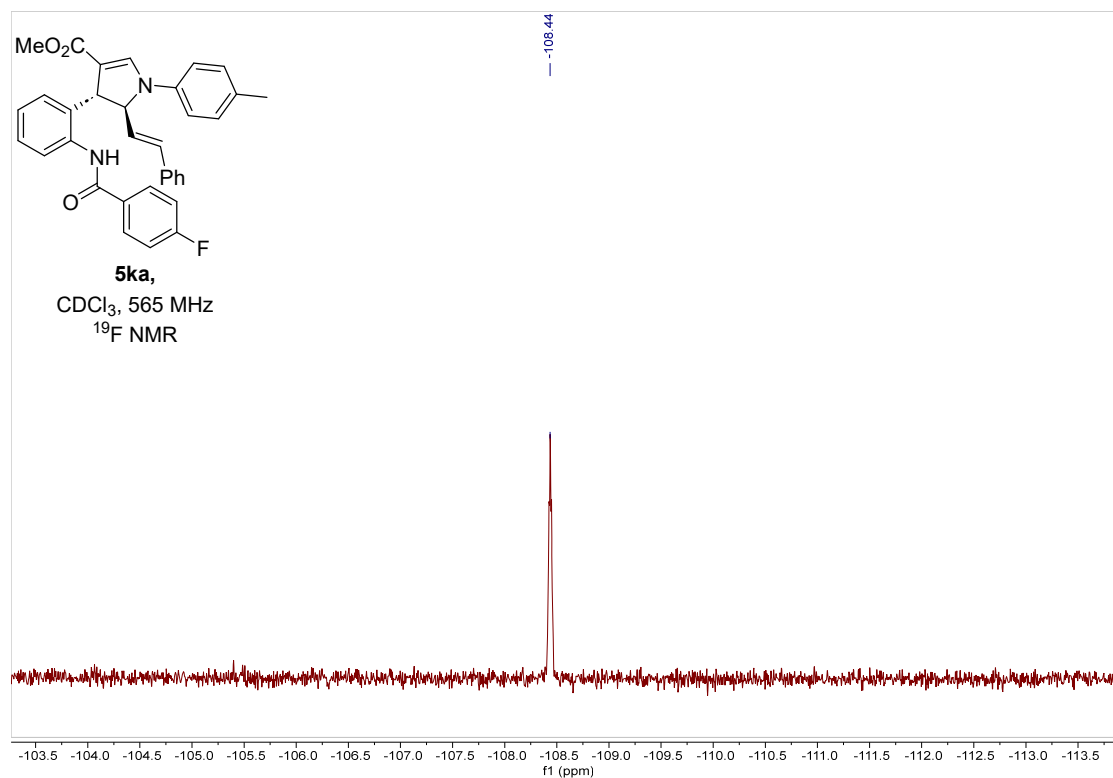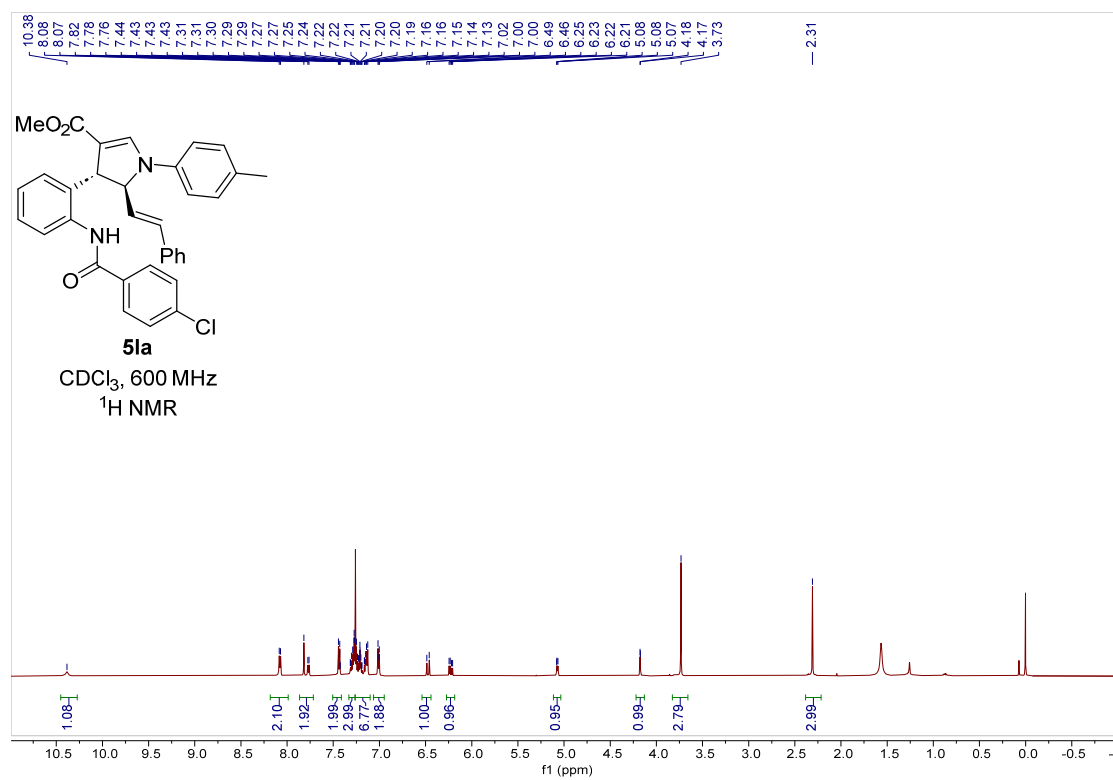



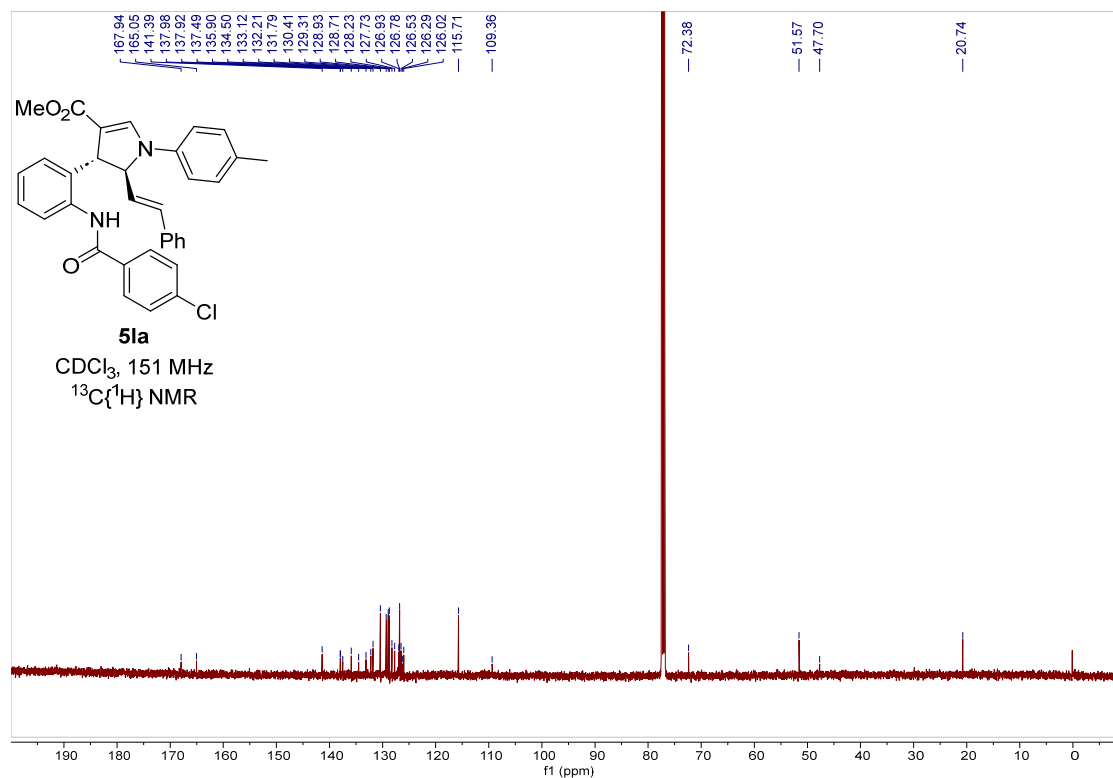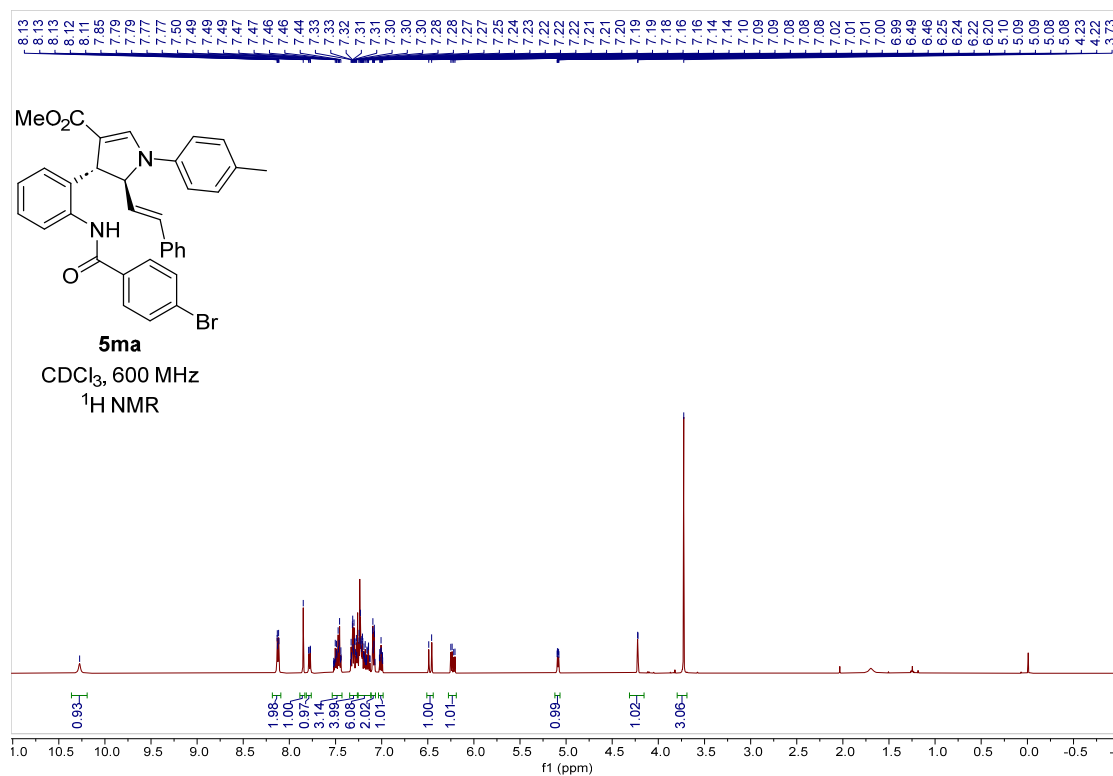

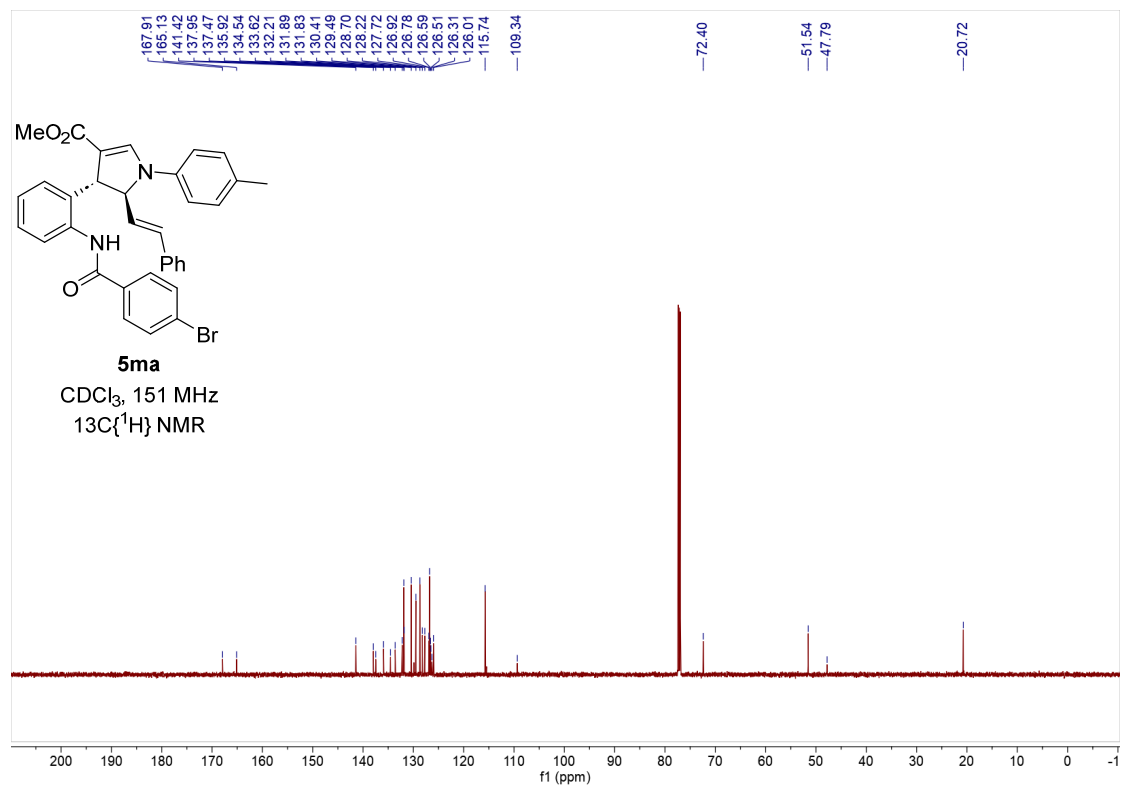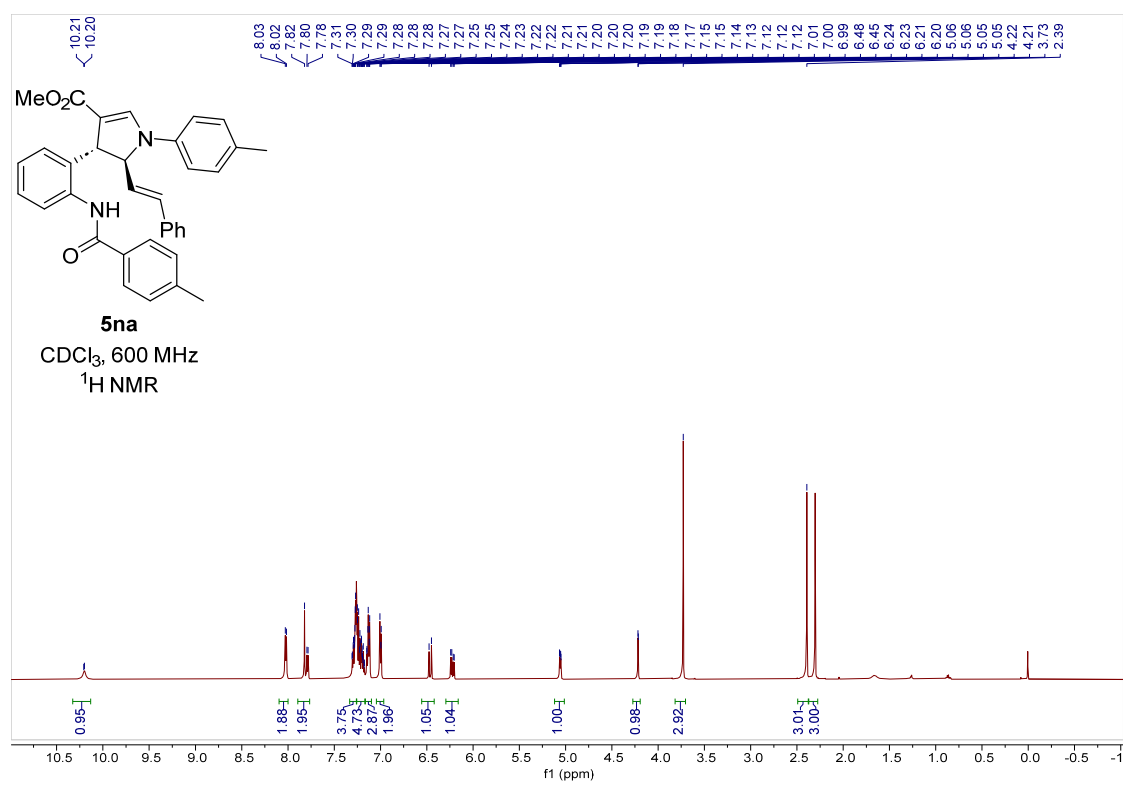

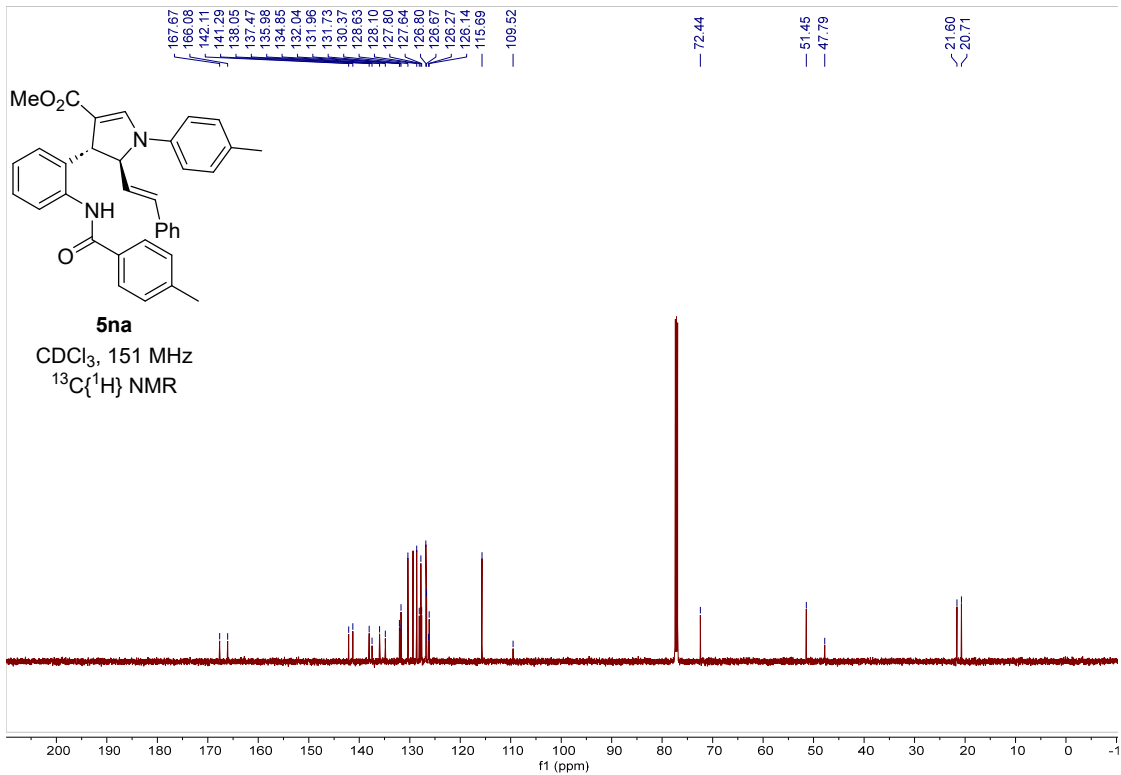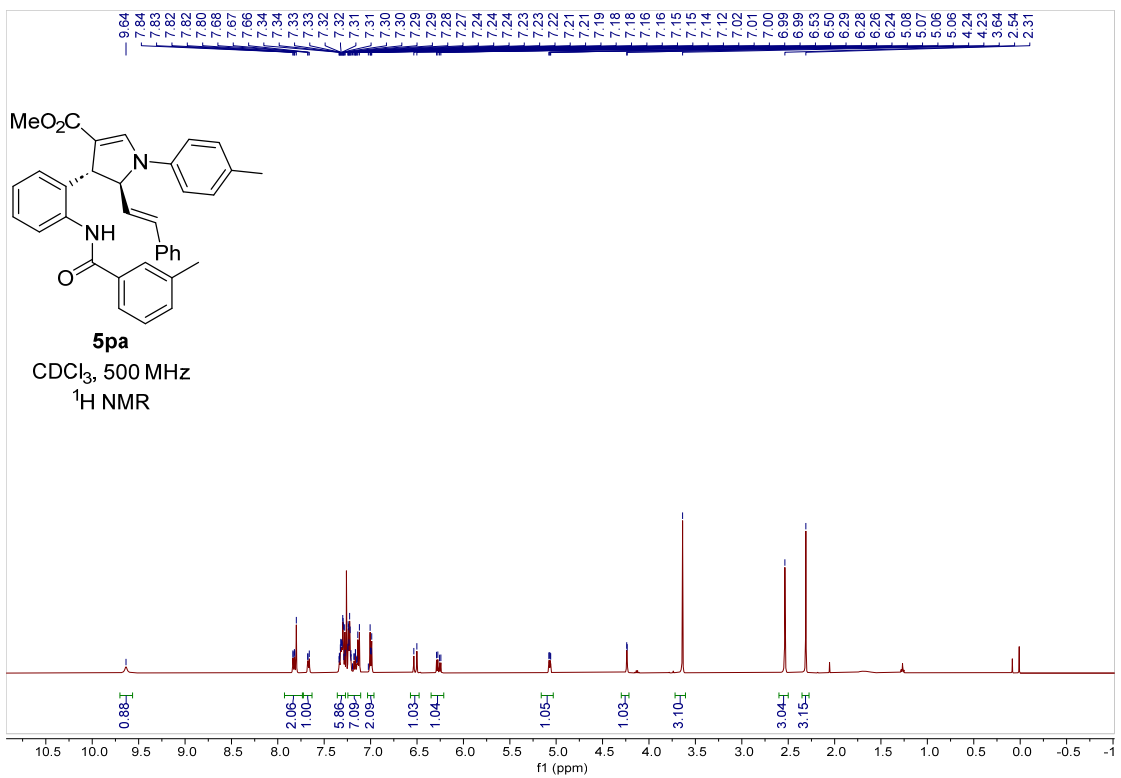

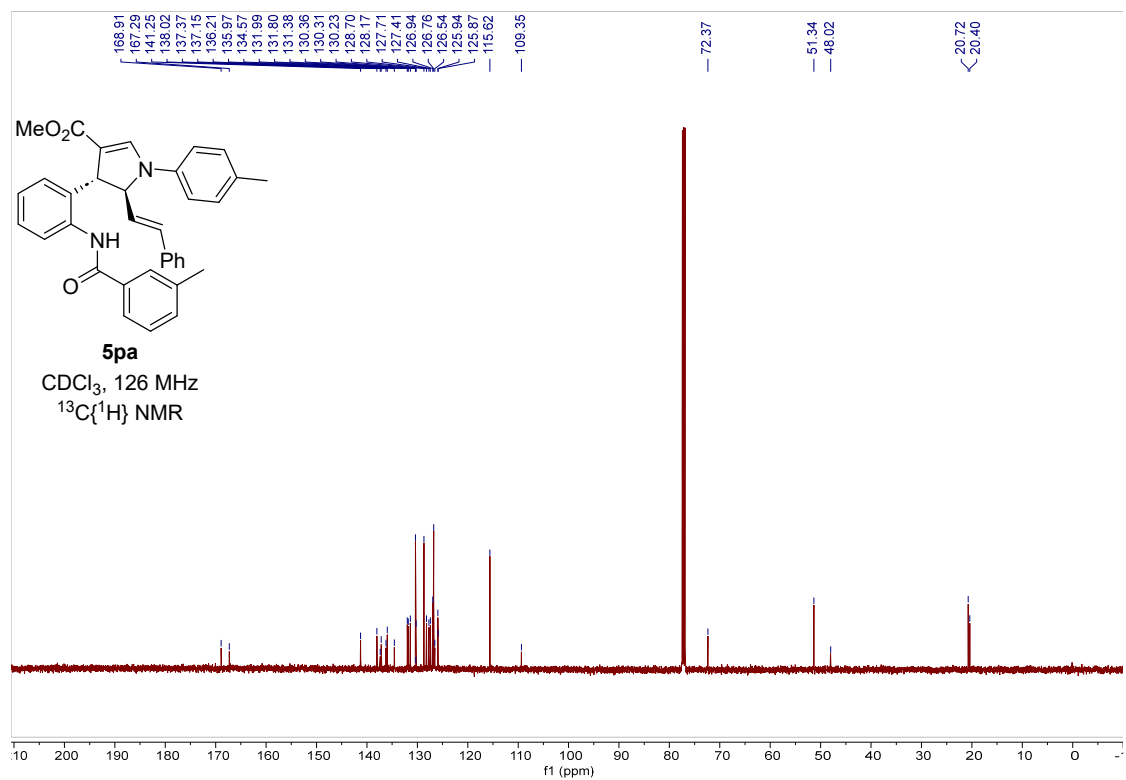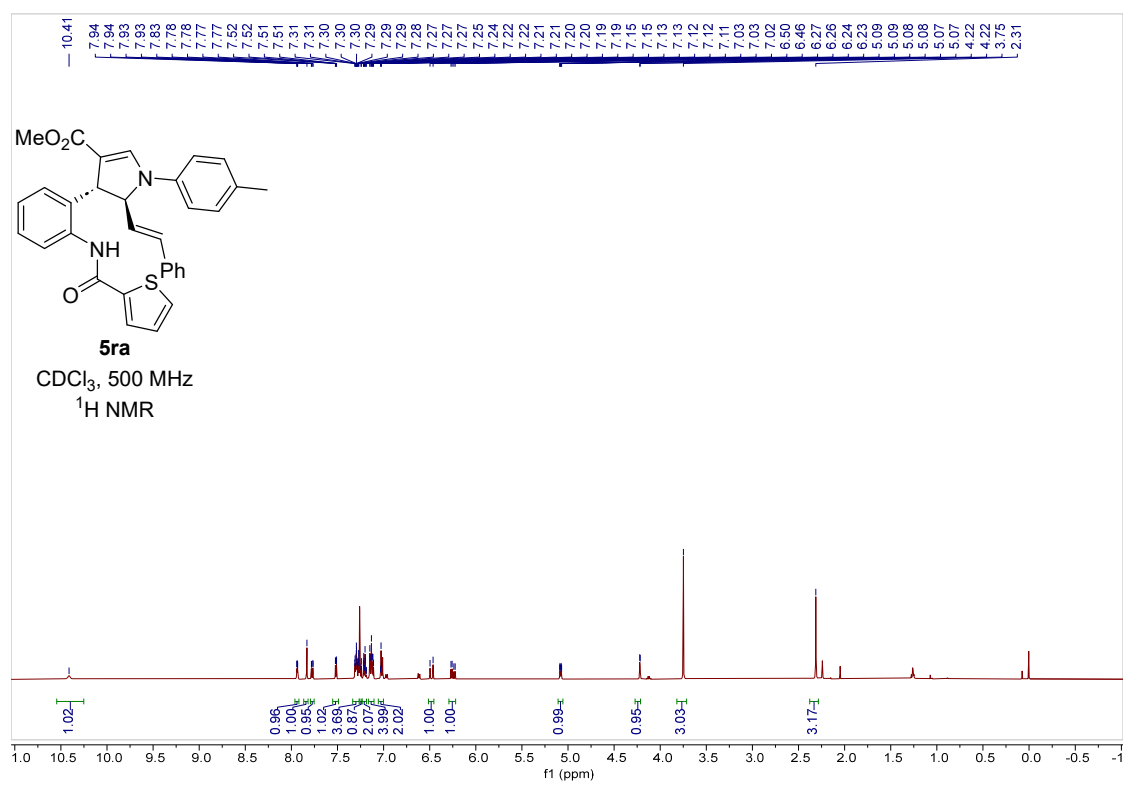

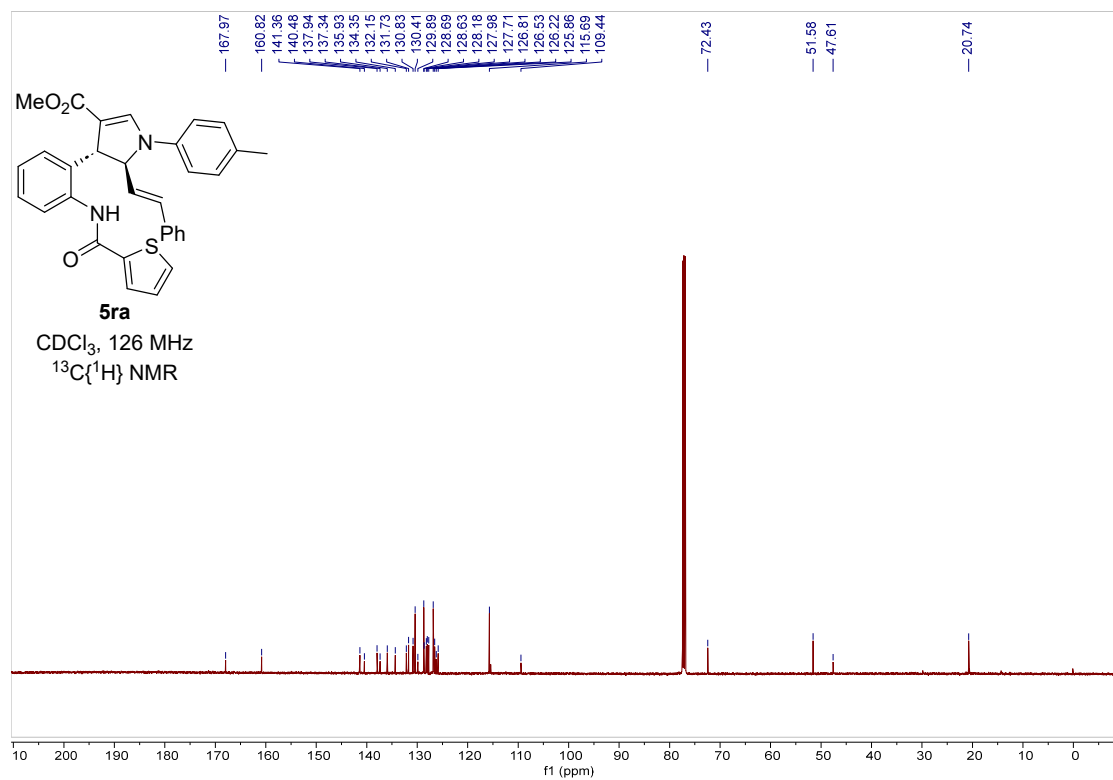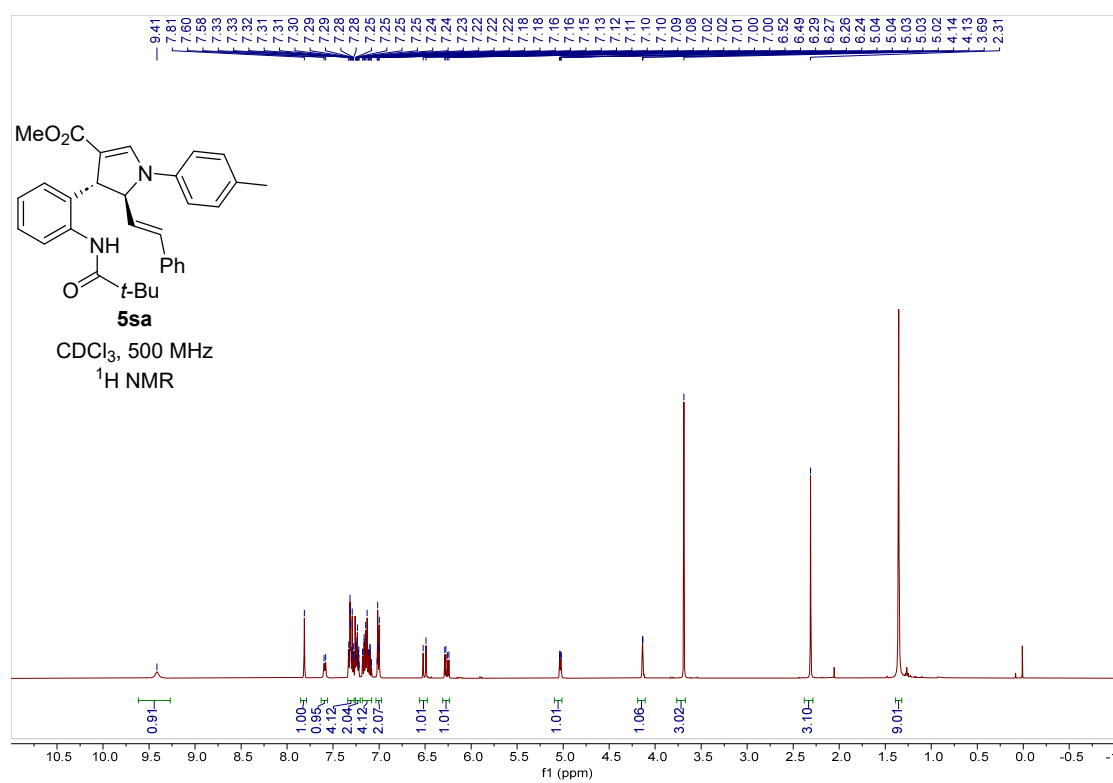

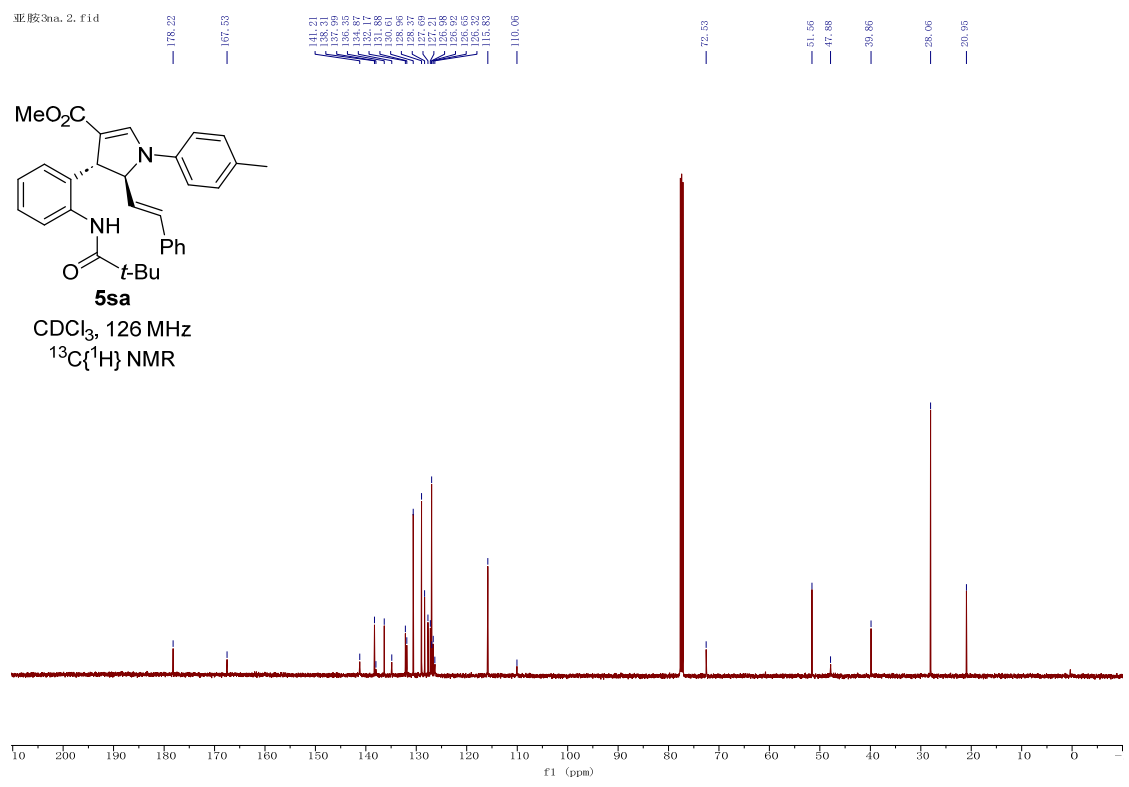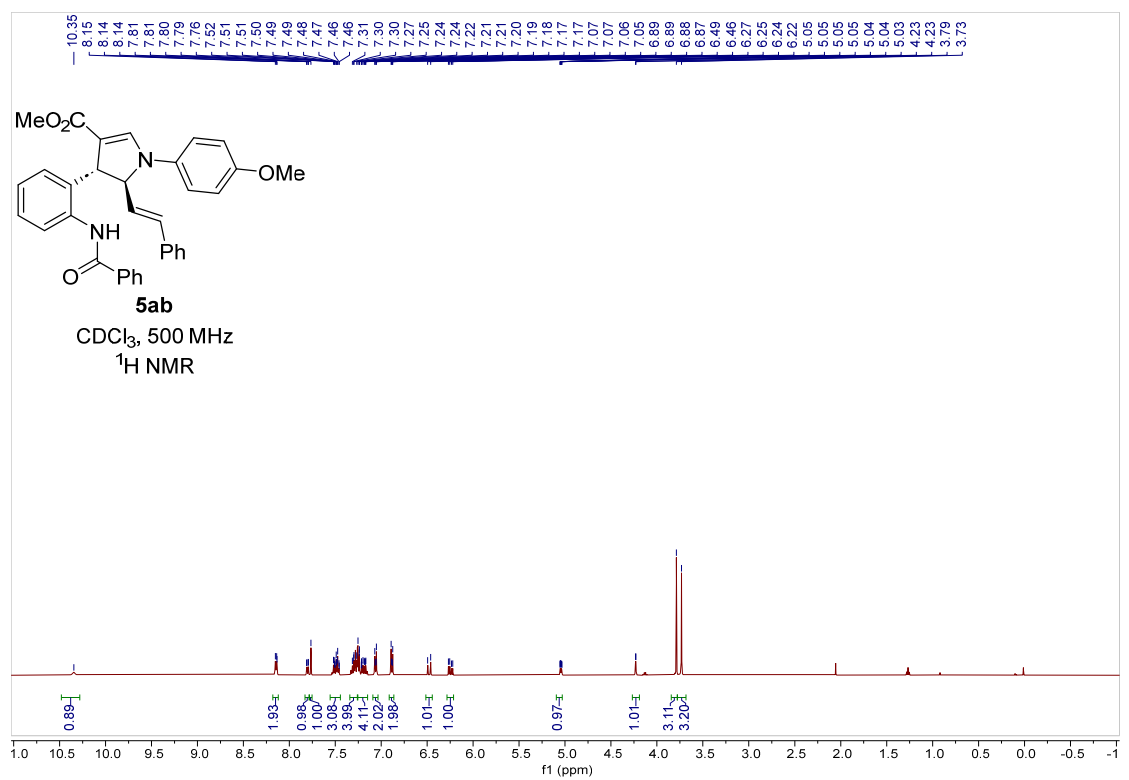

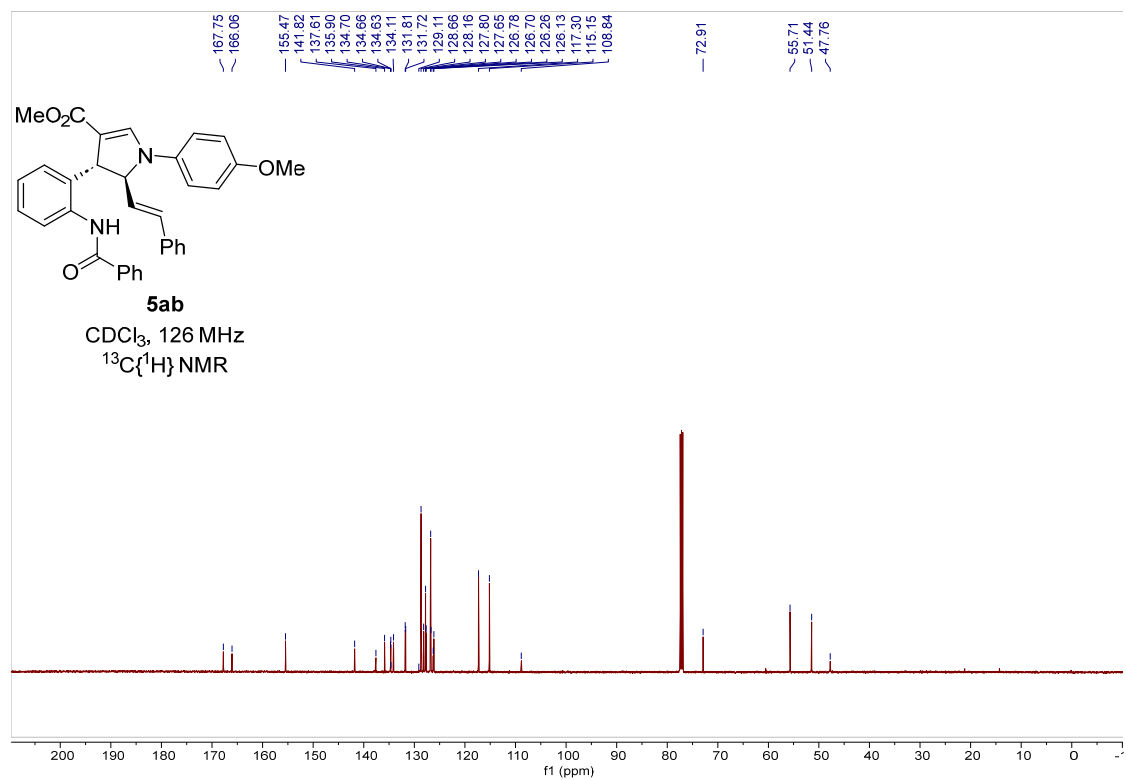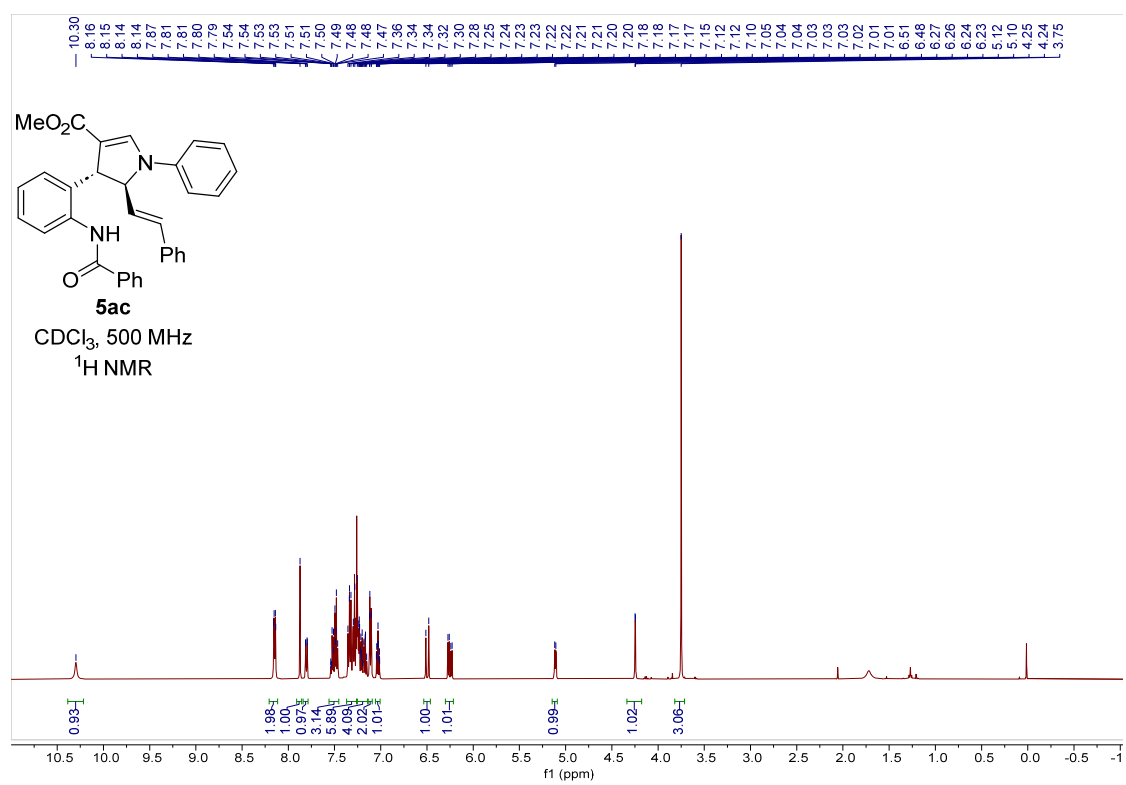









lzy-604-1-re3.2.fid

167.78  
156.05  
156.63  
141.25  
138.54  
137.64  
134.71  
133.70  
133.20  
131.21  
128.67  
128.03  
127.62  
126.77  
124.42  
116.09  
114.43  
106.47  
72.60  
55.43  
51.49  
47.82  
20.73

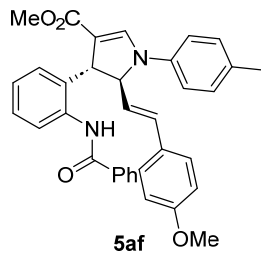

CDCl<sub>3</sub>, 126 MHz  
<sup>13</sup>C{<sup>1</sup>H} NMR

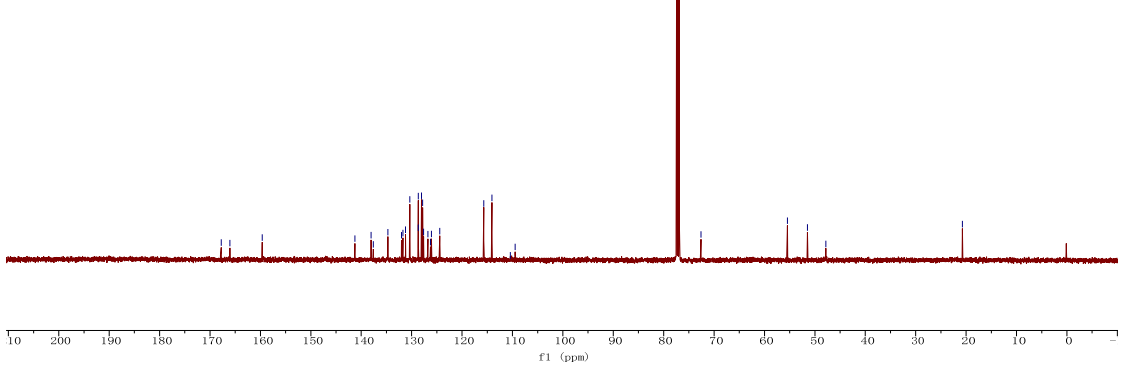

lzy-598-1-re3.1.fid

10.14  
8.14  
7.80  
7.78  
7.50  
7.48  
7.46  
7.21  
7.23  
7.23  
7.18  
7.16  
7.13  
7.04  
7.04  
6.86  
6.42  
6.38  
6.16  
6.06  
6.00  
5.95  
4.21  
4.20  
3.73  
2.21  
2.28

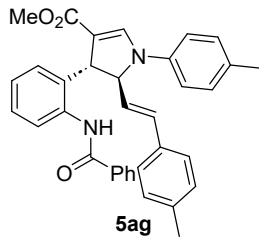

CDCl<sub>3</sub>, 500 MHz  
<sup>1</sup>H NMR

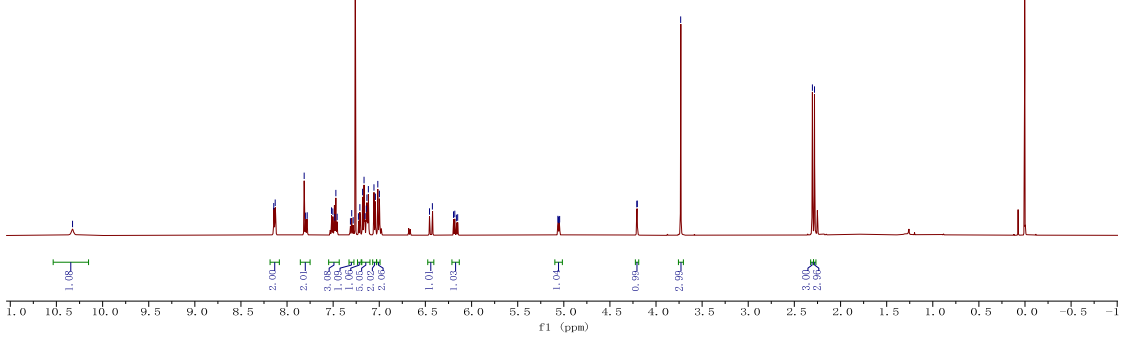

lzy-598-1-re3.2.fid

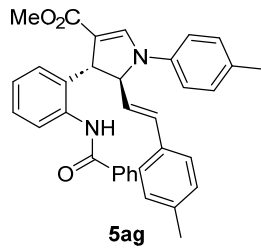

CDCl<sub>3</sub>, 126 MHz  
<sup>13</sup>C{<sup>1</sup>H} NMR

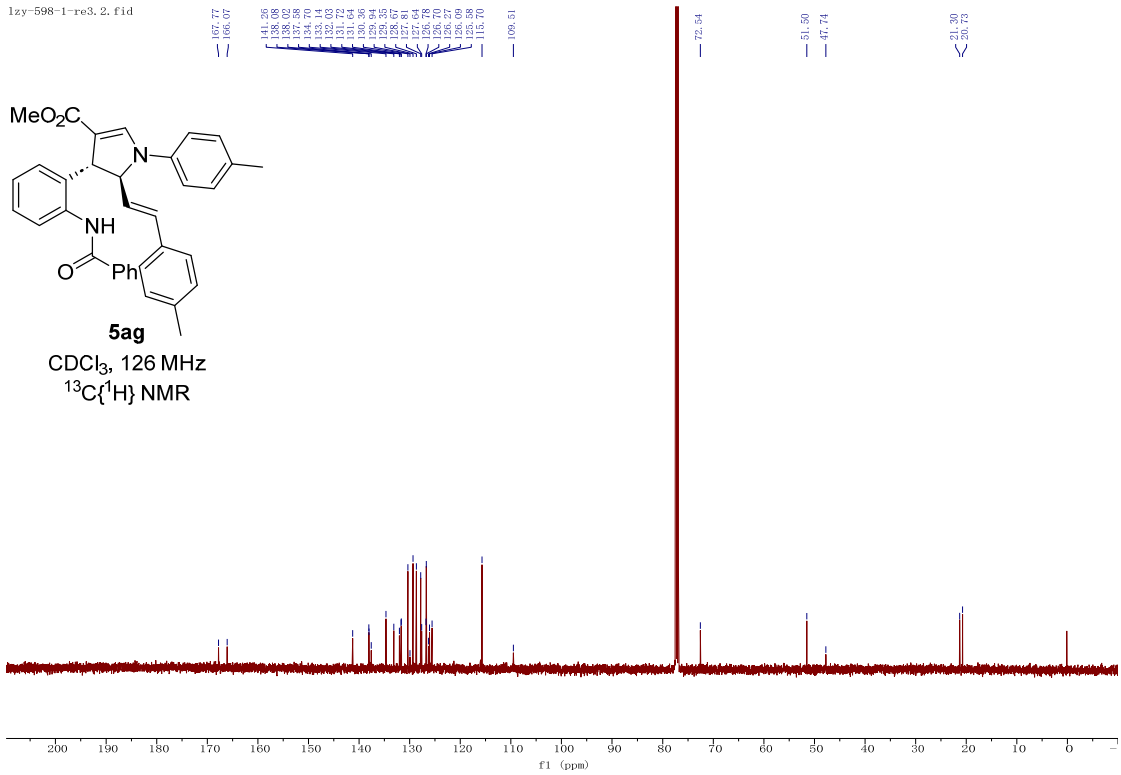

lzy-598-3-re1.5.fid

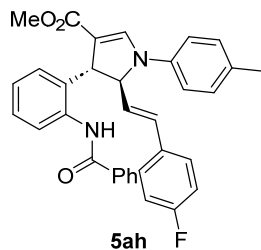

CDCl<sub>3</sub>, 600 MHz  
<sup>1</sup>H NMR

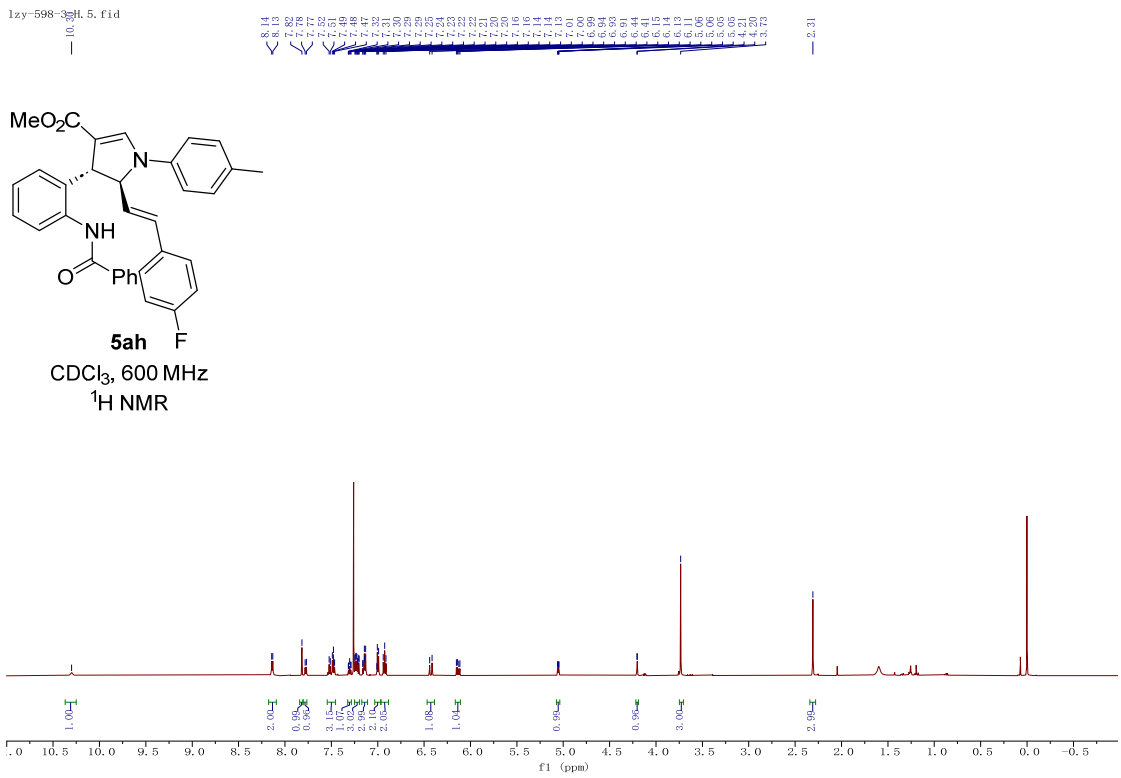

lzy-598-3-C.1.fid

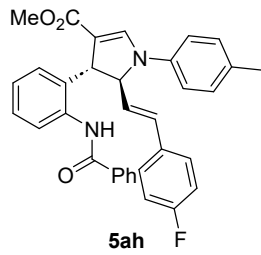

CDCl<sub>3</sub>, 151 MHz  
<sup>13</sup>C{<sup>1</sup>H} NMR

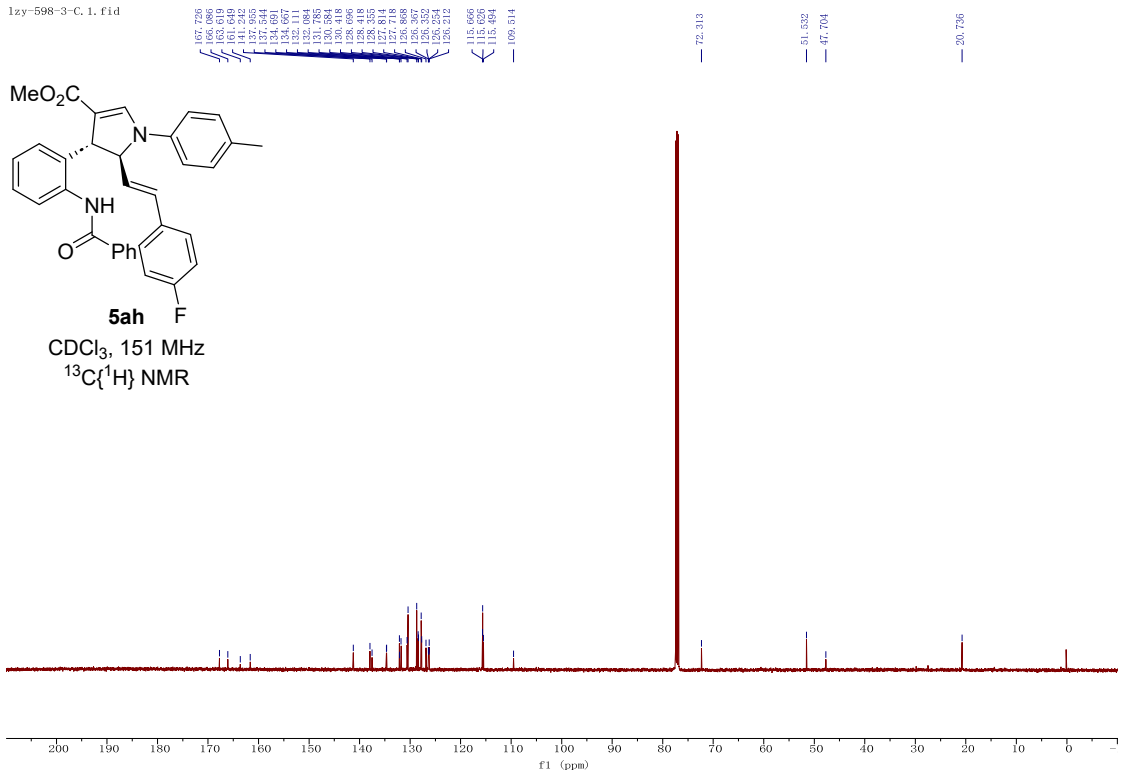

lzy-598-3-F.1.fid

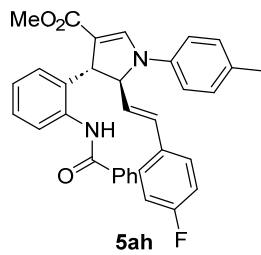

CDCl<sub>3</sub>, 376 MHz  
<sup>19</sup>F NMR

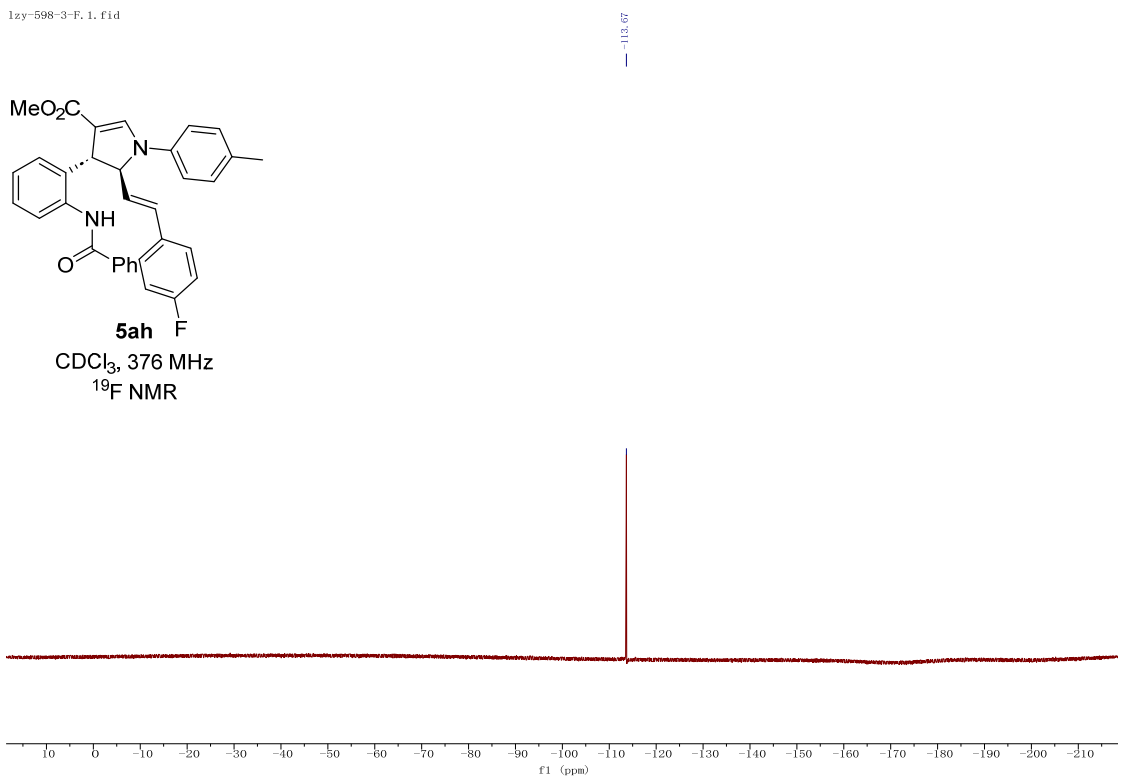



lzy-598-2-re3.1.fid

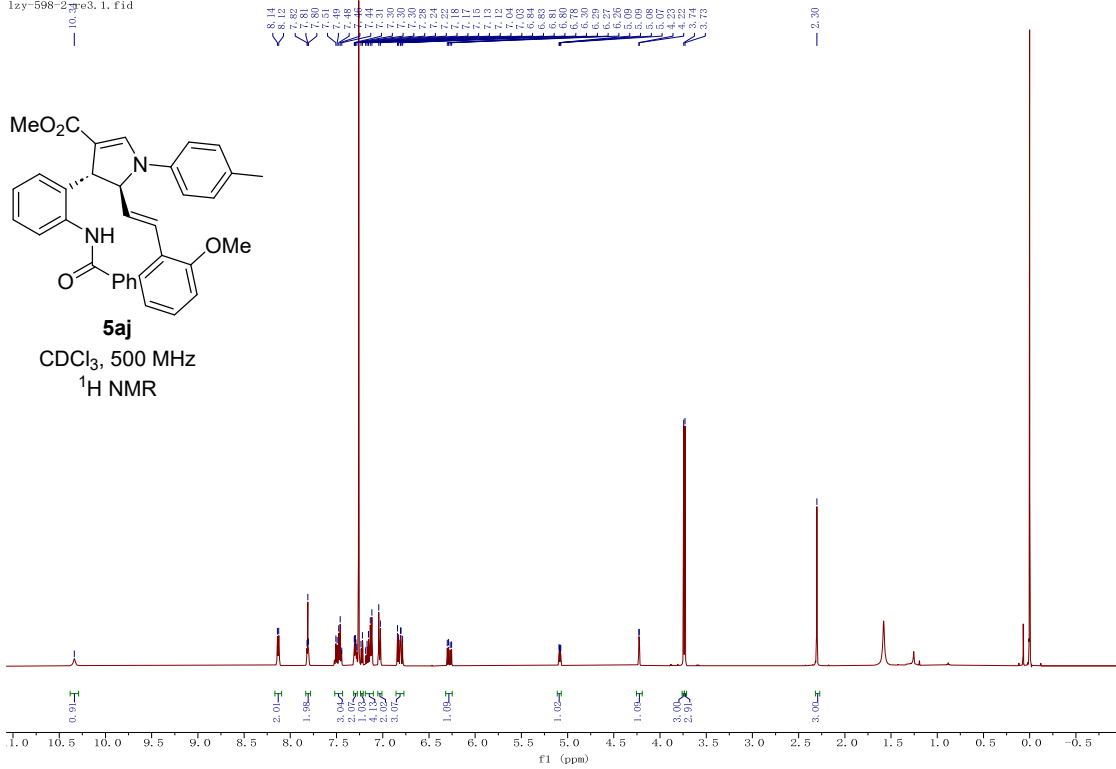

lzy-598-2-re3.2.fid

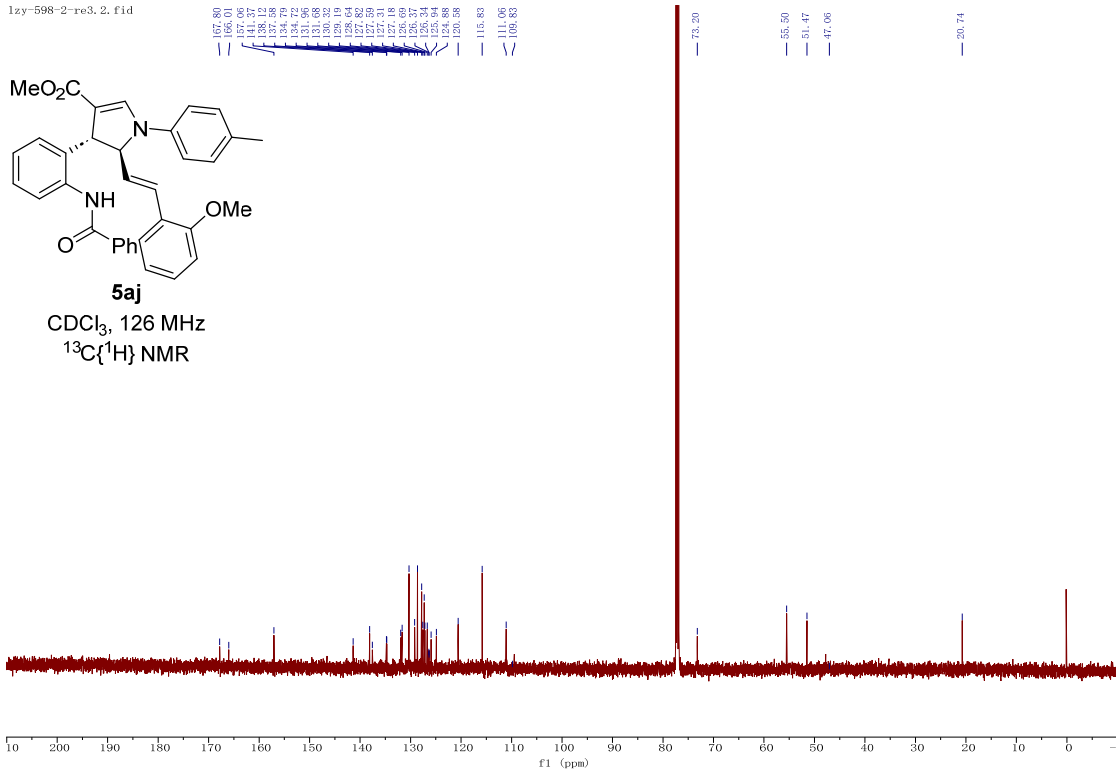

lzy-596-5-re3.1.fid

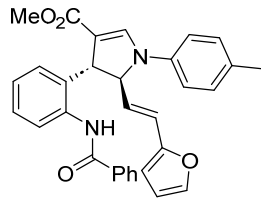

**5ak**

CDCl<sub>3</sub>, 500 MHz  
<sup>1</sup>H NMR

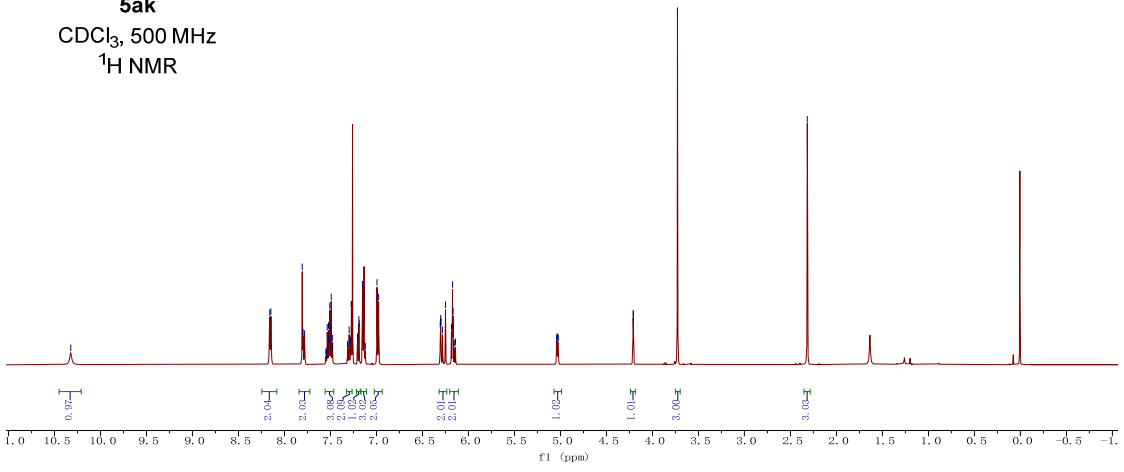

lzy-596-5-re3.2.fid

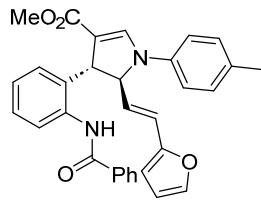

**5ak**

CDCl<sub>3</sub>, 126 MHz  
<sup>13</sup>C{<sup>1</sup>H} NMR

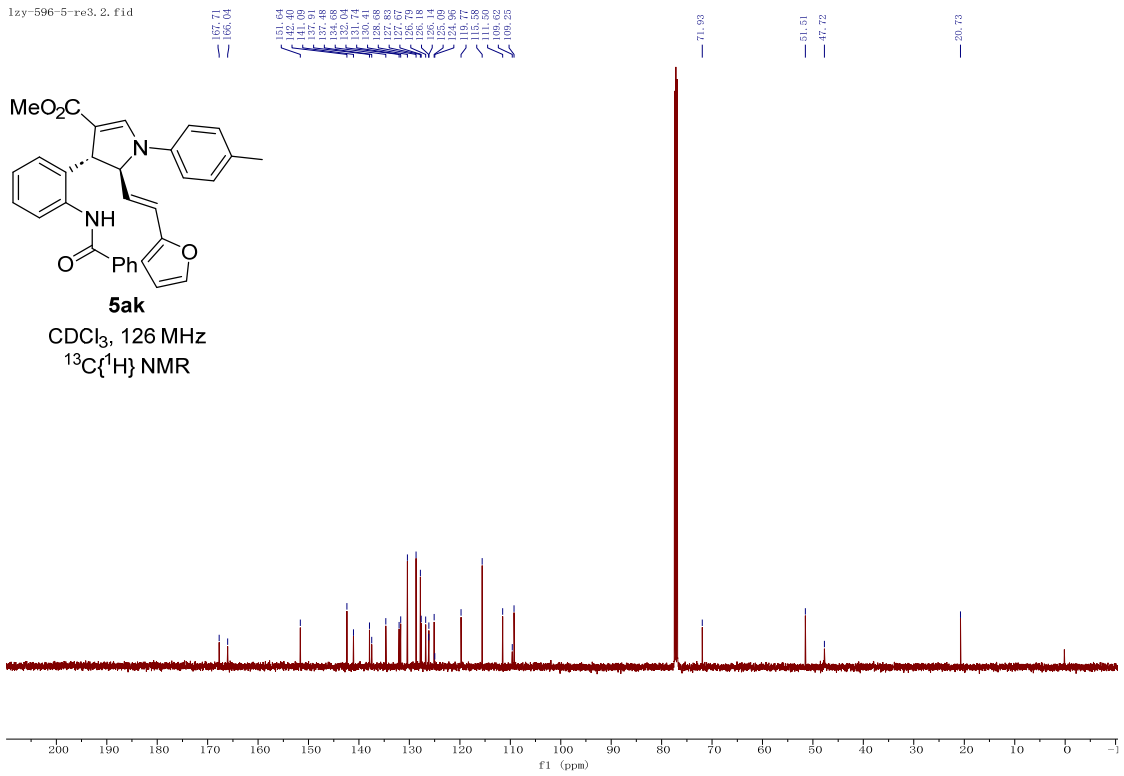



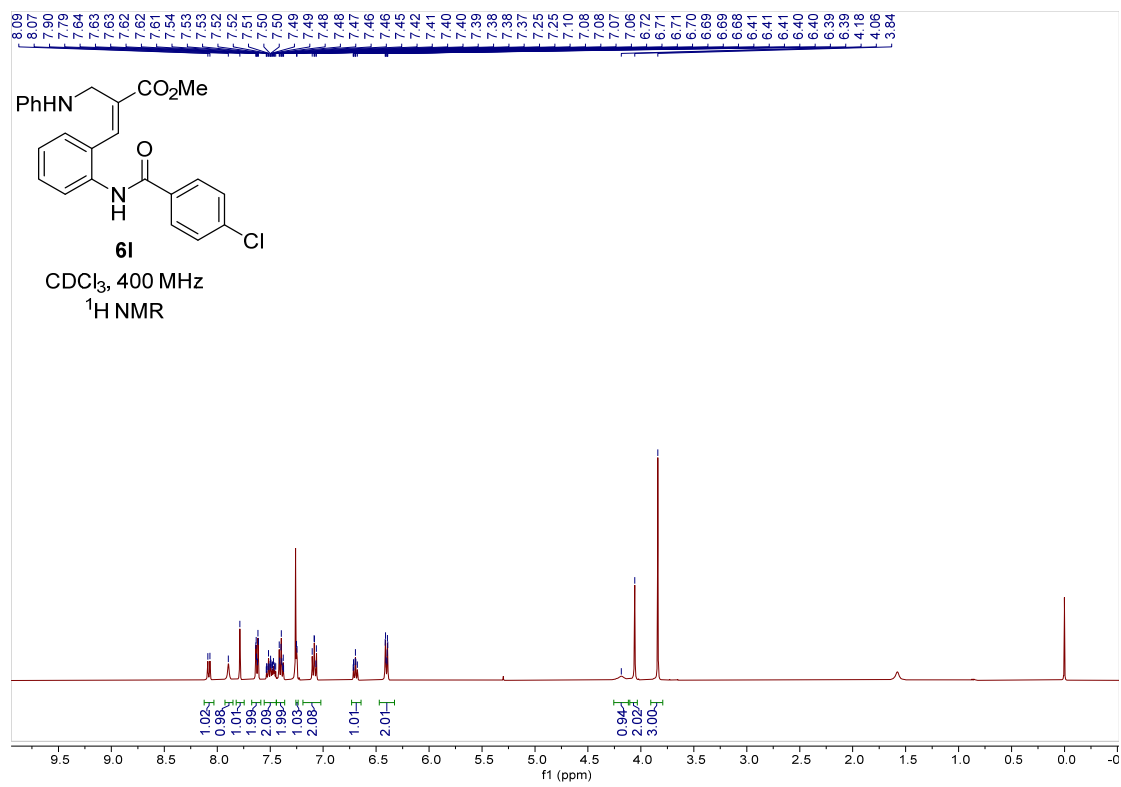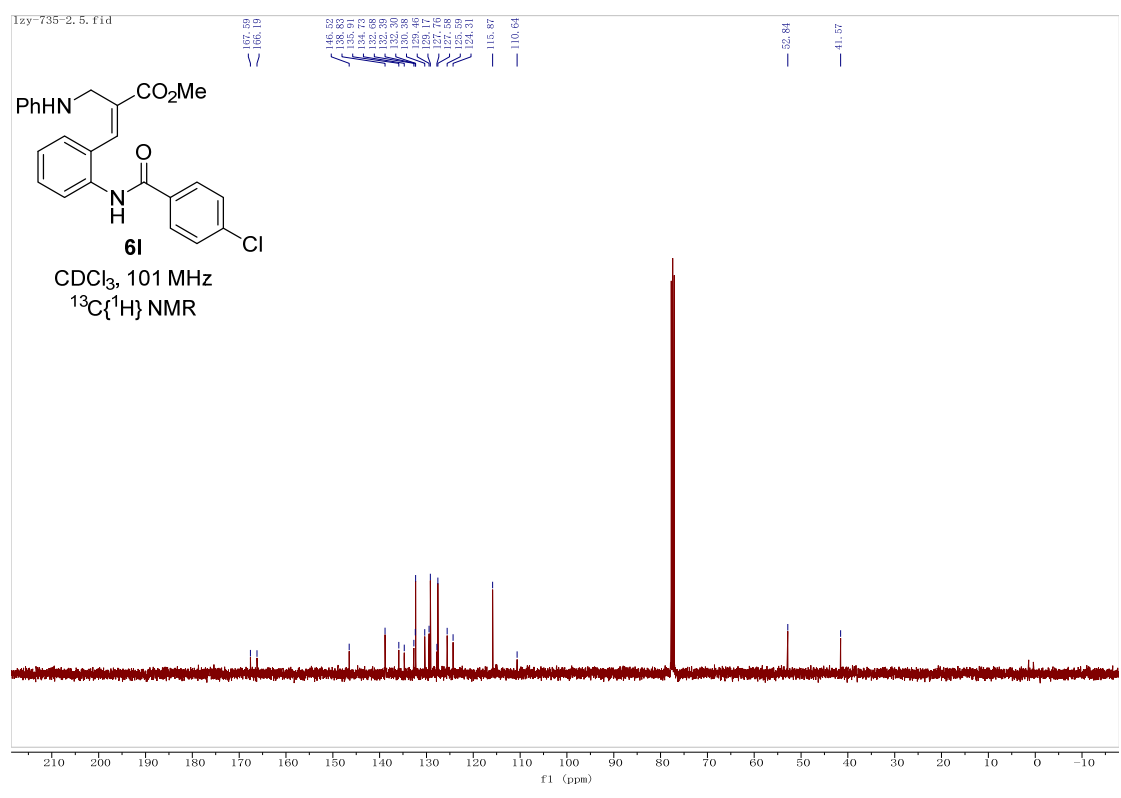

Supplement: d4cc02156h1.pdf [file d4cc02156h1.pdf]
